# Supplementary material
Source: publisher figshare collection journal article supplement (https://acs.figshare.com/ndownloader/files/12302705)
Supplement: Supplementary file 1 [file 12302705]

*Electronic supplementary information (ESI)*

**Marine Natural Products for Drug Discovery: First Discovery of Kealiinines A-C and Their Derivatives as Novel Antiviral and Antiphytopathogenic Fungus Agents**

Gang Li,<sup>†,‡</sup> Jincheng Guo,<sup>‡</sup> Ziwen Wang,<sup>†,\*</sup> Yuxiu Liu,<sup>‡,\*</sup> Haibin Song<sup>‡</sup> and Qingmin Wang<sup>‡,\*</sup>

<sup>†</sup> Tianjin Key Laboratory of Structure and Performance for Functional Molecules, Key Laboratory of Inorganic-Organic Hybrid Functional Materials Chemistry (Tianjin Normal University), Ministry of Education, College of Chemistry, Tianjin Normal University, Tianjin 300387, China

<sup>‡</sup> State Key Laboratory of Elemento-Organic Chemistry, Research Institute of Elemento-Organic Chemistry, Collaborative Innovation Center of Chemical Science and Engineering (Tianjin), Nankai University, Tianjin 300071, China

Ziwen Wang, E-mail: [hxywzw@tjnu.edu.cn](mailto:hxywzw@tjnu.edu.cn); Phone: 0086-22-23766531; Fax: 0086-22-23766531;

Yuxiu Liu, E-mail: [liuyuxiu@nankai.edu.cn](mailto:liuyuxiu@nankai.edu.cn); Phone: 0086-22-23503792; Fax: 0086-22-23503792;

Prof. Qingmin Wang, E-mail: [wangqm@nankai.edu.cn](mailto:wangqm@nankai.edu.cn); Phone: 0086-22-23503952; Fax: 0086-22-23503952.

## Contents

|                                                                                |      |
|--------------------------------------------------------------------------------|------|
| Synthesis of kealiinines A-C .....                                             | S4-8 |
| <sup>1</sup> H NMR and <sup>13</sup> C NMR spectra of <b>1a</b> .....          | S9   |
| <sup>1</sup> H NMR and <sup>13</sup> C NMR spectra of <b>1b</b> .....          | S10  |
| <sup>1</sup> H NMR and <sup>13</sup> C NMR spectra of <b>1c</b> .....          | S11  |
| <sup>1</sup> H NMR and <sup>13</sup> C NMR spectra of <b>2a</b> .....          | S12  |
| HRMS spectrum of <b>2a</b> and <sup>1</sup> H NMR spectrum of <b>2b</b> .....  | S13  |
| <sup>13</sup> C NMR spectrum of <b>2b</b> and HRMS spectrum of <b>2b</b> ..... | S14  |

|                                                                                |     |
|--------------------------------------------------------------------------------|-----|
| <sup>1</sup> H NMR and <sup>13</sup> C NMR spectra of <b>2c</b> .....          | S15 |
| HRMS spectrum of <b>2c</b> and <sup>1</sup> H NMR spectrum of <b>2d</b> .....  | S16 |
| <sup>13</sup> C NMR spectrum of <b>2d</b> and HRMS spectrum of <b>2d</b> ..... | S17 |
| <sup>1</sup> H NMR and <sup>13</sup> C NMR spectra of <b>2e</b> .....          | S18 |
| HRMS spectrum of <b>2e</b> and <sup>1</sup> H NMR spectrum of <b>2f</b> .....  | S19 |
| <sup>13</sup> C NMR spectrum of <b>2f</b> and HRMS spectrum of <b>2f</b> ..... | S20 |
| <sup>1</sup> H NMR and <sup>13</sup> C NMR spectra of <b>2g</b> .....          | S21 |
| HRMS spectrum of <b>2g</b> and <sup>1</sup> H NMR spectrum of <b>2h</b> .....  | S22 |
| <sup>13</sup> C NMR spectrum of <b>2h</b> and HRMS spectrum of <b>2h</b> ..... | S23 |
| <sup>1</sup> H NMR and <sup>13</sup> C NMR spectra of <b>2i</b> .....          | S24 |
| HRMS spectrum of <b>2i</b> and <sup>1</sup> H NMR spectrum of <b>2j</b> .....  | S25 |
| <sup>13</sup> C NMR spectrum of <b>2j</b> and HRMS spectrum of <b>2j</b> ..... | S26 |
| <sup>1</sup> H NMR and <sup>13</sup> C NMR spectra of <b>2k</b> .....          | S27 |
| HRMS spectrum of <b>2k</b> and <sup>1</sup> H NMR spectrum of <b>2l</b> .....  | S28 |
| <sup>13</sup> C NMR spectrum of <b>2l</b> and HRMS spectrum of <b>2l</b> ..... | S29 |
| <sup>1</sup> H NMR and <sup>13</sup> C NMR spectra of <b>2m</b> .....          | S30 |
| <sup>1</sup> H NMR and <sup>13</sup> C NMR spectra of <b>2n</b> .....          | S31 |
| HRMS spectrum of <b>2n</b> and <sup>1</sup> H NMR spectrum of <b>2o</b> .....  | S32 |
| <sup>13</sup> C NMR spectrum of <b>2o</b> and HRMS spectrum of <b>2o</b> ..... | S33 |
| <sup>1</sup> H NMR and <sup>13</sup> C NMR spectra of <b>2p</b> .....          | S34 |
| HRMS spectrum of <b>2p</b> and <sup>1</sup> H NMR spectrum of <b>2q</b> .....  | S35 |
| <sup>13</sup> C NMR spectrum of <b>2q</b> and HRMS spectrum of <b>2q</b> ..... | S36 |
| <sup>1</sup> H NMR and <sup>13</sup> C NMR spectra of <b>2r</b> .....          | S37 |
| HRMS spectrum of <b>2r</b> and <sup>1</sup> H NMR spectrum of <b>2s</b> .....  | S38 |
| <sup>13</sup> C NMR spectrum of <b>2s</b> and HRMS spectrum of <b>2s</b> ..... | S39 |
| <sup>1</sup> H NMR and <sup>13</sup> C NMR spectra of <b>2t</b> .....          | S40 |
| HRMS spectrum of <b>2t</b> and <sup>1</sup> H NMR spectrum of <b>2u</b> .....  | S41 |
| <sup>13</sup> C NMR spectrum of <b>2u</b> and HRMS spectrum of <b>2u</b> ..... | S42 |
| <sup>1</sup> H NMR and <sup>13</sup> C NMR spectra of <b>2v</b> .....          | S43 |
| HRMS spectrum of <b>2v</b> and <sup>1</sup> H NMR spectrum of <b>2w</b> .....  | S44 |

|                                                                                |     |
|--------------------------------------------------------------------------------|-----|
| $^{13}\text{C}$ NMR spectrum of <b>2w</b> and HRMS spectrum of <b>2w</b> ..... | S45 |
| $^1\text{H}$ NMR and $^{13}\text{C}$ NMR spectra of <b>2x</b> .....            | S46 |
| HRMS spectrum of <b>2x</b> and $^1\text{H}$ NMR spectrum of <b>2y</b> .....    | S47 |
| $^{13}\text{C}$ NMR spectrum of <b>2y</b> and HRMS spectrum of <b>2y</b> ..... | S48 |
| $^1\text{H}$ NMR and $^{13}\text{C}$ NMR spectra of <b>2z</b> .....            | S49 |
| HRMS spectrum of <b>2z</b> and $^1\text{H}$ NMR spectrum of <b>9b</b> .....    | S50 |
| $^{13}\text{C}$ NMR spectra of <b>9b</b> .....                                 | S51 |
| The X-ray crystal data of <b>2d</b> .....                                      | S52 |

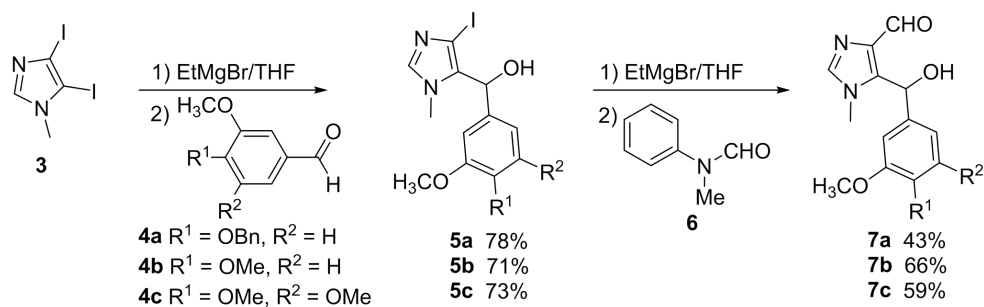

## General Procedures for the Preparation of (substituted phenyl)(4-iodo-1-methyl-1H-imidazol-5-yl)methanols (**5**).

To a solution of 4,5-diiodo-1-methyl-1H-imidazole (**3**) (10 mmol) in anhydrous tetrahydrofuran (THF) (100 mL) was added C<sub>2</sub>H<sub>5</sub>MgBr (3 M in ether, 3.5 mL, 10.5 mmol) dropwise under argon at 0 °C. After completing addition of C<sub>2</sub>H<sub>5</sub>MgBr, the reaction mixture was allowed to be stirred at room temperature for 2 h. Then a solution of substituted benzaldehyde (**4**) (11 mmol) in anhydrous THF (7 mL) was added. The reaction mixture was stirred at room temperature for 16 h and quenched with aqueous saturated ammonium chloride (80 mL). After separation, the aqueous phase was extracted with ethyl acetate (EA) (100 mL×3). The combined organic phase was washed with brine (150 mL), dried over anhydrous Na<sub>2</sub>SO<sub>4</sub> and concentrated. The residue was washed with a little ethyl acetate and filtered to give **5** as a pale yellow or white solid.

For **5a**: pale yellow solid; mp. 161–163 °C; yield 78%; <sup>1</sup>H NMR (400 MHz, DMSO-*d*<sub>6</sub>) δ 7.59 (s, 1H), 7.44–7.31 (m, 5H), 7.00 (d, *J* = 8.4 Hz), 6.98 (d, *J* = 1.6 Hz, 1H), 6.66–6.63 (m, 1H), 6.24 (d, *J* = 4.0 Hz, 1H), 5.80 (d, *J* = 4.0 Hz, 1H), 5.04 (s, 2H), 3.74 (s, 3H), 3.41 (s, 3H); <sup>13</sup>C NMR (100 MHz, DMSO-*d*<sub>6</sub>) δ 149.4, 147.2, 141.8, 137.5, 135.3, 135.2, 128.8, 128.3, 117.7, 113.9, 109.8, 85.6, 70.4, 66.5, 55.9, 33.1.

For **5b**: white solid; mp. 189–191 °C; yield 71%; <sup>1</sup>H NMR (400 MHz, DMSO-*d*<sub>6</sub>) δ 7.59 (s, 1H), 6.95 (d, *J* = 1.6 Hz, 1H), 6.91 (d, *J* = 8.4 Hz, 1H), 6.67 (d, *J* = 8.4 Hz, 1H), 6.23 (d, *J* = 4.0 Hz, 1H), 5.79 (d, *J* = 4.0 Hz, 1H), 3.72 (s, 3H), 3.71 (s, 3H), 3.40 (s, 3H); <sup>13</sup>C NMR (100 MHz, DMSO-*d*<sub>6</sub>) δ 148.5, 147.7, 141.3, 134.8, 134.3, 117.2, 111.6, 109.0, 85.1, 66.0, 55.4, 55.3, 32.6.

For **5c**: pale yellow solid; mp. 178–179 °C; yield 73%; <sup>1</sup>H NMR (400 MHz, DMSO-*d*<sub>6</sub>) δ 7.59 (s, 1H), 6.58 (s, 2H), 6.32 (s, 1H), 5.79 (s, 1H), 3.72 (s, 6H), 3.63 (s, 3H), 3.45 (s, 3H); <sup>13</sup>C NMR (100 MHz, DMSO-*d*<sub>6</sub>) δ 152.7, 141.3, 137.6, 136.3, 134.5, 102.4, 85.2, 66.2, 60.0, 55.7, 32.7.



**General Procedures for the Preparation of 5-((substituted phenyl)(hydroxy)methyl)-1-methyl-1H-imidazole-4-carbaldehydes (7).** To a solution of (substituted phenyl)(4-iodo-1-methyl-1H-imidazol-5-yl)methanol (**5**) (6.7 mmol) in anhydrous tetrahydrofuran (THF) (120 mL) was added  $\text{C}_2\text{H}_5\text{MgBr}$  (3 M in ether, 5.6 mL, 16.8 mmol) dropwise under argon at 0 °C. After completing addition of  $\text{C}_2\text{H}_5\text{MgBr}$ , the reaction mixture was warmed slowly to room temperature and stirred for 3–4 h. The anhydrous *N*-methyl-*N*-phenylformamide (**6**) (1.36 g, 10.0 mmol) was added by syringe and stirred at room temperature for 16 h. The mixture was quenched with aqueous saturated  $\text{NH}_4\text{Cl}$  (80 mL) and extracted with ethyl acetate (100 mL $\times$ 3). The combined organic phase was washed with brine (150 mL), dried over anhydrous  $\text{Na}_2\text{SO}_4$  and concentrated. The residue was purified by column chromatography on silica gel with petroleum ether/ethyl acetate as eluent to give **7** as a yellow solid.

For **7a**: yellow solid; mp. 145–147 °C; yield 43%;  $^1\text{H}$  NMR (400 MHz,  $\text{CDCl}_3$ )  $\delta$  9.88 (s, 1H), 7.43 (s, 1H), 7.42–7.28 (m, 5H), 6.97 (d,  $J$  = 1.6 Hz, 1H), 6.77 (d,  $J$  = 8.0 Hz, 1H), 6.58 (dd,  $J$  = 8.0, 1.6 Hz, 1H), 6.01 (s, 2H), 5.12 (s, 2H), 3.84 (s, 3H), 3.53 (s, 3H);  $^{13}\text{C}$  NMR (100 MHz,  $\text{CDCl}_3$ )  $\delta$  189.3, 150.0, 148.2, 142.0, 139.2, 138.2, 136.9, 133.4, 128.6, 127.9, 127.2, 118.2, 113.6, 110.1, 71.0, 67.5, 56.0, 32.7.

For **7b**: yellow solid; mp. 141–143 °C; yield 66%;  $^1\text{H}$  NMR (400 MHz,  $\text{CDCl}_3$ )  $\delta$  9.91 (s, 1H), 7.48 (s, 1H), 6.95 (d,  $J$  = 2.0 Hz, 1H), 6.77 (d,  $J$  = 8.0 Hz, 1H), 6.64 (dd,  $J$  = 8.0, 2.0 Hz, 1H), 5.94 (s, 2H), 3.86 (s, 3H), 3.85 (s, 3H), 3.58 (s, 3H);  $^{13}\text{C}$  NMR (100 MHz,  $\text{CDCl}_3$ )  $\delta$  189.5, 149.6, 149.2, 142.2, 139.2, 138.5, 133.1, 118.4, 111.1, 109.7, 67.8, 56.0, 32.5.

For **7c**: yellow solid; mp. 149–151 °C; yield 59%;  $^1\text{H}$  NMR (400 MHz,  $\text{CDCl}_3$ )  $\delta$  9.92 (s, 1H), 7.48 (s, 1H), 6.51 (s, 2H), 6.02 (s, 1H), 5.87 (s, 1H), 3.82 (s, 3H), 3.80 (s, 6H), 3.60 (s, 3H);  $^{13}\text{C}$  NMR (100 MHz,  $\text{CDCl}_3$ )  $\delta$  189.5, 153.6, 141.6, 139.2, 138.4, 138.0, 136.0, 103.3, 68.0, 60.8, 56.2, 32.8.

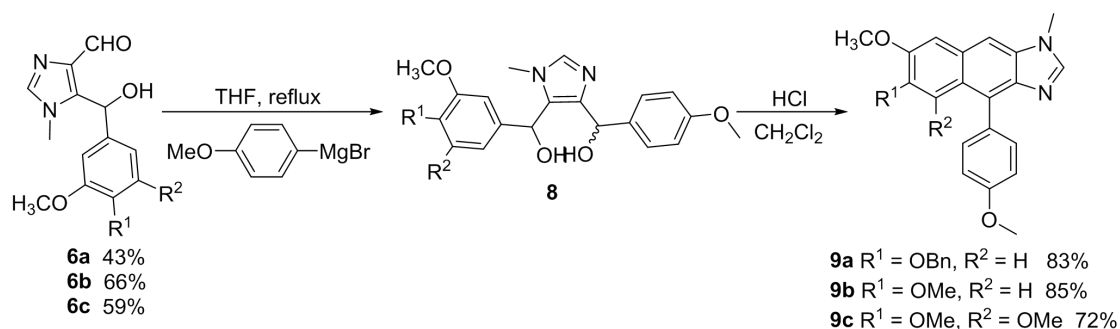

**General Procedures for the Preparation of Intermediates (8).** To a suspension of magnesium chips (18 mmol) and anhydrous THF (80 mL) was added 1-bromo-4-methoxybenzene (12 mmol) dropwise over ca. 30 mins under argon to maintain a controlled reflux. Then, the reaction mixture was refluxed for another 2–3 h and cooled to room temperature. A solution of 5-((substituted phenyl)(hydroxy)methyl)-1-methyl-1H-imidazole-4-carbaldehydes (**7**) (2 mmol) in anhydrous THF (18 mL) was added, followed by heating the reaction mixture at reflux for 16 h. The reaction was quenched with aqueous saturated  $\text{NH}_4\text{Cl}$  (80 mL), filtered and the filtrate was extracted with ethyl acetate (80 mL $\times$ 3). The combined organic phase was washed with brine (100 mL), dried over anhydrous  $\text{Na}_2\text{SO}_4$  and concentrated. The residue was used for next step without further purification.

**General Procedures for the Preparation of 4-(4-methoxyphenyl)-1-methyl-1H-naphtho[2,3-d]imidazole (9).** To a solution of the crude product (**8**) (nearly 2 mmol) in  $\text{CH}_2\text{Cl}_2$  (30 mL) was added concentrated  $\text{HCl}$  (2 mL, 24 mmol) dropwise and stirred at room temperature for 3–4 h. To the mixture was added water (30 mL) and aqueous saturated  $\text{NaHCO}_3$  to pH 7, and the resulting mixture was extracted with  $\text{CH}_2\text{Cl}_2$  (50 mL $\times$ 3). The combined organic phase was washed with brine (50 mL), dried over anhydrous  $\text{Na}_2\text{SO}_4$  and concentrated. The residue was purified by column chromatography on silica gel with  $\text{CH}_2\text{Cl}_2/\text{MeOH}$  as eluent to give **9** as a light brown solid.

For **9a**: light brown solid; mp. 221–223 °C; yield 83%;  $^1\text{H}$  NMR (400 MHz,  $\text{CDCl}_3$ )  $\delta$  7.93 (s, 1H), 7.64 (s, 1H), 7.42 (d,  $J$  = 8.4 Hz, 2H), 7.41–7.30 (m, 6H), 7.08 (d,  $J$  = 8.4 Hz, 2H), 5.16 (s, 2H), 4.07 (s, 3H), 3.95 (s, 3H), 3.88 (s, 3H);  $^{13}\text{C}$  NMR (100 MHz,  $\text{CDCl}_3$ )  $\delta$  158.8, 149.2, 146.8, 146.0, 141.1, 136.9, 133.8, 132.0, 129.1, 128.5, 127.9, 127.8, 127.5, 127.3, 123.9, 114.0, 107.1, 105.8, 103.0, 70.4, 55.9, 55.4, 31.1.

For **9b**: light brown solid; mp. 212–214 °C; yield 85%;  $^1\text{H}$  NMR (400 MHz,  $\text{CDCl}_3$ )  $\delta$  7.93 (s, 1H), 7.64 (s, 1H), 7.58 (d,  $J$  = 8.8 Hz, 2H), 7.34 (s, 1H), 7.25 (s, 1H), 7.12 (d,  $J$  = 8.8 Hz, 2H), 4.04 (s, 3H), 3.91 (s, 3H,  $\text{OCH}_3$ ), 3.89 (s, 3H), 3.84 (s, 3H);  $^{13}\text{C}$  NMR (100 MHz,  $\text{CDCl}_3$ )  $\delta$  158.9, 148.9, 148.1, 146.0, 141.3, 133.8, 132.0, 129.2, 128.0, 127.2, 124.0, 114.0, 105.6, 104.4, 103.2, 55.8, 55.7, 55.4, 31.1.

For **9c**: light brown solid; mp. 224–226 °C; yield 72%;  $^1\text{H}$  NMR (400 MHz,  $\text{CDCl}_3$ )  $\delta$  7.92 (s, 1H), 7.65 (s, 1H), 7.40 (d,  $J$  = 8.8 Hz, 2H), 7.10 (s, 1H), 7.02 (d,  $J$  = 8.8 Hz, 2H), 4.01 (s, 3H), 3.92 (s, 3H), 3.89 (s, 3H), 3.87 (s, 3H), 3.33 (s, 3H);  $^{13}\text{C}$  NMR (100 MHz,  $\text{CDCl}_3$ )  $\delta$  158.1, 151.9, 150.1,

146.4, 142.7, 140.8, 134.3, 132.3, 130.6, 129.4, 127.9, 119.6, 112.6, 103.8, 102.0, 61.2, 60.6, 55.7, 55.3, 31.1.

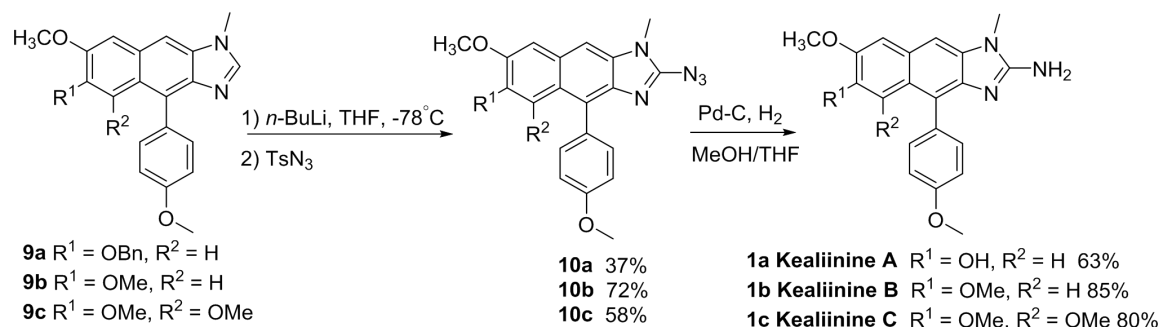

## General Procedures for the Preparation of

**2-Azido-4-(4-methoxyphenyl)-1-methyl-1H-naphtho[2,3-d]imidazole (10).** To a solution of 4-(4-methoxyphenyl)-1-methyl-1H-naphtho[2,3-d]imidazole (**9**) (0.47 mmol) in anhydrous THF (10 mL) was added *n*-BuLi (1.6 M in hexane, 0.59 mL, 0.90 mmol) dropwise at -78 °C under argon and was stirred at -78 °C for 3 h. The tosyl azide ( $\text{TsN}_3$ ) (0.71 mmol) was added by syringe and the resulting mixture was stirred at room temperature for 2 h. The reaction mixture was quenched with aqueous saturated  $\text{NH}_4\text{Cl}$  (4 mL) and extracted with ethyl acetate (20 mL $\times$ 3). The combined organic phase was washed with brine (20 mL), dried over anhydrous  $\text{Na}_2\text{SO}_4$  and concentrated. The crude product was purified quickly by column chromatography on silica gel with petroleum ether/ethyl acetate as eluent to give **10** as a yellow solid. (The products were not stable!)

For **10a**: yellow solid; yield 37%;  $^1\text{H}$  NMR (400 MHz,  $\text{CDCl}_3$ )  $\delta$  7.43–7.27 (m, 9H), 7.20 (s, 1H), 7.03 (d,  $J = 8.8$  Hz, 2H), 5.12 (s, 2H), 4.02 (s, 3H), 3.92 (s, 3H), 3.57 (s, 3H);  $^{13}\text{C}$  NMR (100 MHz,  $\text{CDCl}_3$ )  $\delta$  158.7, 149.9, 148.9, 146.7, 138.8, 136.9, 134.8, 132.2, 128.8, 128.5, 127.7, 127.4, 126.5, 125.6, 124.2, 113.8, 107.2, 105.9, 102.6, 70.4, 55.8, 55.3, 29.0.

For **10b**: yellow solid; yield 72%;  $^1\text{H}$  NMR (400 MHz,  $\text{CDCl}_3$ )  $\delta$  7.58 (d,  $J = 8.8$  Hz, 2H), 7.44 (s, 1H), 7.31 (s, 1H), 7.21 (s, 1H), 7.10 (d,  $J = 8.8$  Hz, 2H), 4.02 (s, 3H), 3.92 (s, 3H), 3.83 (s, 3H), 3.63 (s, 3H);  $^{13}\text{C}$  NMR (100 MHz,  $\text{CDCl}_3$ )  $\delta$  158.9, 150.0, 148.6, 148.1, 139.1, 134.9, 132.4, 129.0, 126.5, 125.9, 124.4, 113.9, 105.8, 104.7, 102.8, 55.9, 55.7, 55.4, 29.1.

For **10c**: yellow solid; yield 58%;  $^1\text{H}$  NMR (400 MHz,  $\text{CDCl}_3$ )  $\delta$  7.44 (s, 1H), 7.40 (d,  $J = 8.8$  Hz, 2H), 7.04 (s, 1H), 7.00 (d,  $J = 8.8$  Hz, 2H), 3.99 (s, 3H), 3.91 (s, 3H), 3.90 (s, 3H), 3.59 (s, 3H), 3.29 (s, 3H,  $\text{NCH}_3$ );  $^{13}\text{C}$  NMR (100 MHz,  $\text{CDCl}_3$ )  $\delta$  158.0, 151.6, 150.4, 150.1, 140.8, 140.4, 135.3, 131.8, 131.1, 128.7, 125.6, 119.7, 112.4, 103.3, 102.2, 61.2, 60.6, 55.7, 55.3, 29.0.

**General Procedures for the Preparation of Kealiinines A-C (1).** To a solution of 2-azido-4-(4-methoxyphenyl)-1-methyl-1H-naphtho[2,3-d]imidazole (**10**) (0.32 mmol) in THF (20 mL) and MeOH (20 mL) was added 10% Pd/C (50 mg). A balloon containing hydrogen was connected with the reaction vessel and the reaction mixture was stirred under hydrogen atmosphere at room temperature for 10 h. The mixture was filtered through celite and the filter cake was washed with MeOH (10 mL×3), and the filtrate was concentrated to give a grey-green or pale brown solid which could be further purified by column chromatography on silica gel with CH<sub>2</sub>Cl<sub>2</sub>/MeOH as eluent.

For **kealiinine A**: grey-green solid; mp. 277–278 °C; yield 63%; <sup>1</sup>H NMR (400 MHz, DMSO-*d*<sub>6</sub>) δ 8.88 (s, 1H), 7.35 (d, *J* = 8.0 Hz, 2H), 7.34 (s, 1H), 7.25 (s, 1H), 7.05 (d, *J* = 8.0 Hz, 2H), 7.04 (s, 1H), 6.70 (s, 2H), 3.86 (s, 3H), 3.83 (s, 3H), 3.54 (s, 3H); <sup>13</sup>C NMR (100 MHz, DMSO-*d*<sub>6</sub>) δ 158.4, 157.4, 147.1, 145.1, 134.8, 132.6, 130.6, 124.4, 124.2, 120.3, 113.8, 107.6, 107.1, 101.6, 55.8, 55.6, 28.9.

For **kealiinine B**: pale brown solid; mp. 278–280 °C; yield 85%; <sup>1</sup>H NMR (400 MHz, DMSO-*d*<sub>6</sub>) δ 7.43 (d, *J* = 8.0 Hz, 2H), 7.38 (s, 1H), 7.29 (s, 1H), 7.11 (s, 1H), 7.05 (d, *J* = 8.0 Hz, 2H), 6.69 (s, 2H), 3.86 (s, 3H), 3.83 (s, 3H), 3.63 (s, 3H), 3.55 (s, 3H); <sup>13</sup>C NMR (100 MHz, DMSO-*d*<sub>6</sub>) δ 157.8, 157.2, 146.9, 146.8, 140.4, 135.0, 132.1, 129.8, 124.0, 123.0, 120.6, 113.3, 106.7, 104.0, 101.1, 55.2, 55.0, 55.0, 28.4.

For **kealiinine C**: pale brown solid; mp. 302–304 °C; yield 80%; <sup>1</sup>H NMR (400 MHz, DMSO-*d*<sub>6</sub>) δ 7.40 (s, 1H), 7.17 (d, *J* = 8.8 Hz, 2H), 7.15 (s, 1H), 6.89 (d, *J* = 8.8 Hz, 2H), 6.72 (s, 2H), 3.88 (s, 3H), 3.80 (s, 3H), 3.72 (s, 3H), 3.53 (s, 3H), 3.10 (s, 3H); <sup>13</sup>C NMR (100 MHz, DMSO-*d*<sub>6</sub>) δ 157.3, 157.0, 149.5, 148.9, 139.4, 135.7, 133.2, 130.9, 126.4, 120.1, 118.3, 111.8, 102.9, 101.6, 60.5, 60.0, 55.4, 55.0, 28.4.

LG-3-74-2  
PROTON

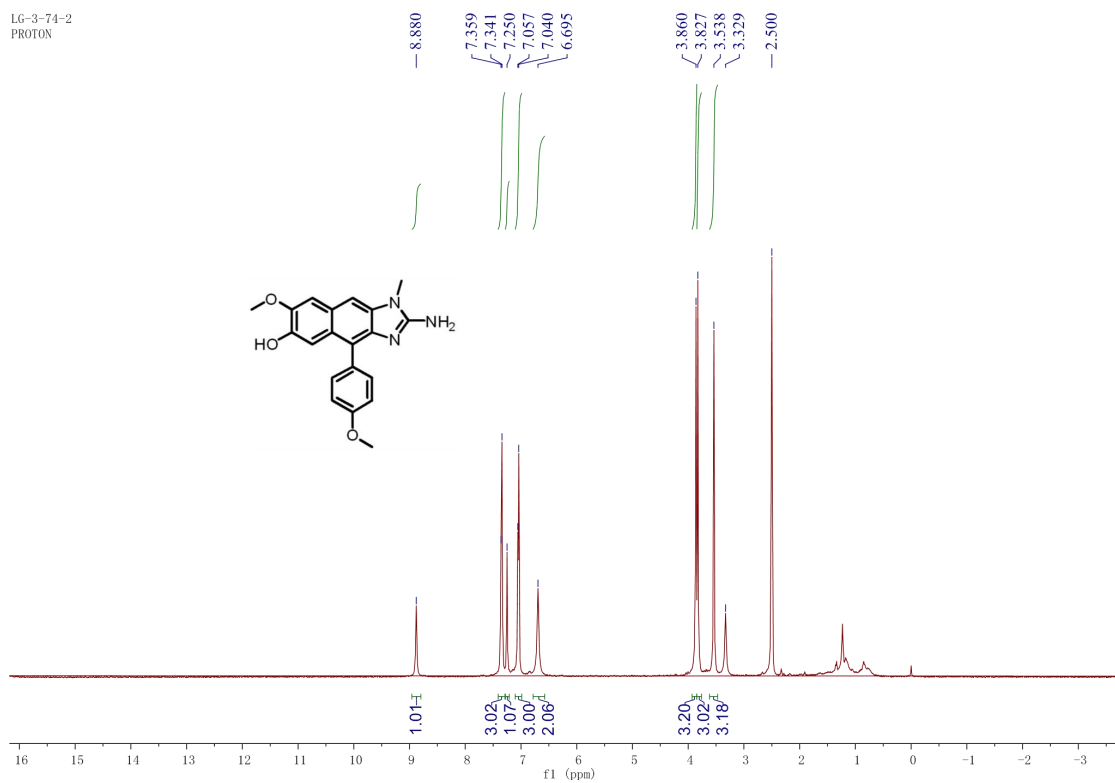

LG-3-74-2  
C13CPD

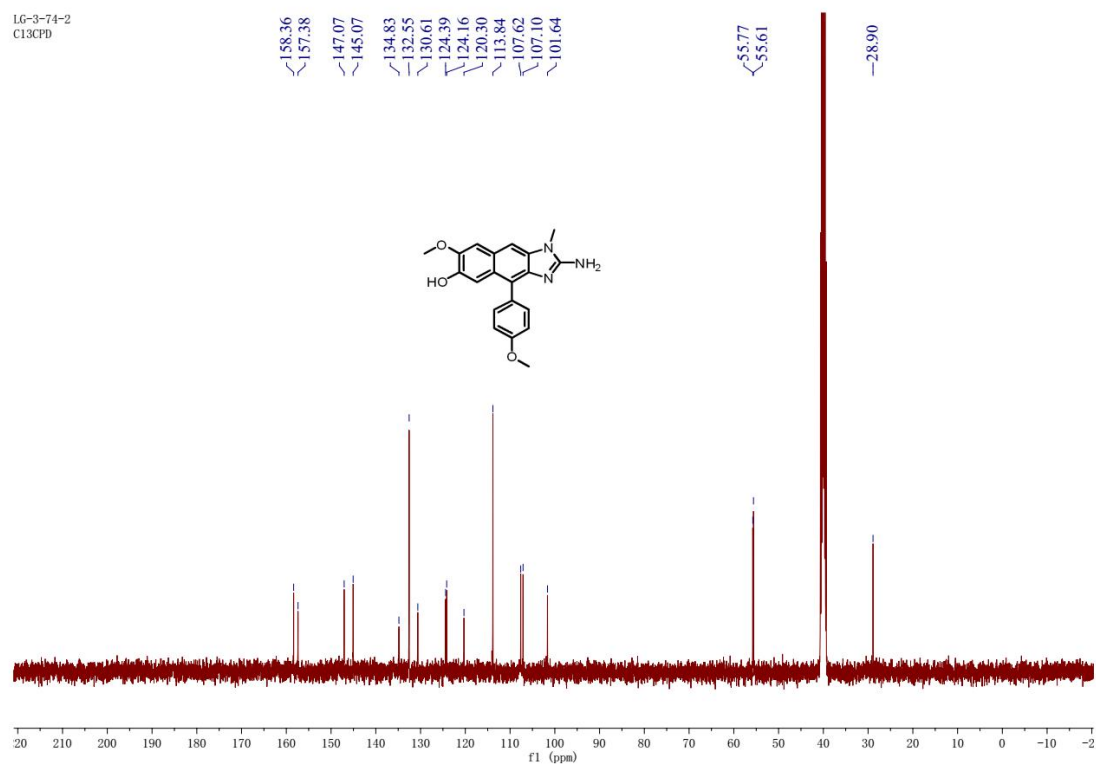

LG-2-78  
PROTON

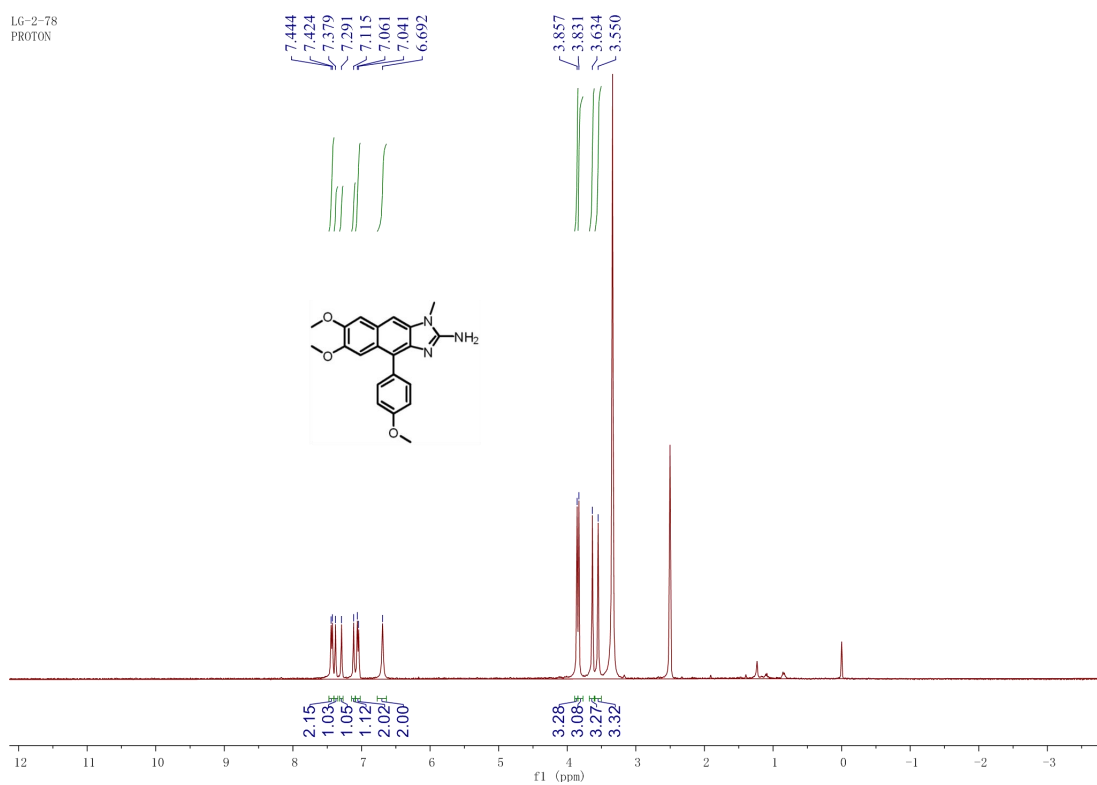

LG-2-78  
C13CPD

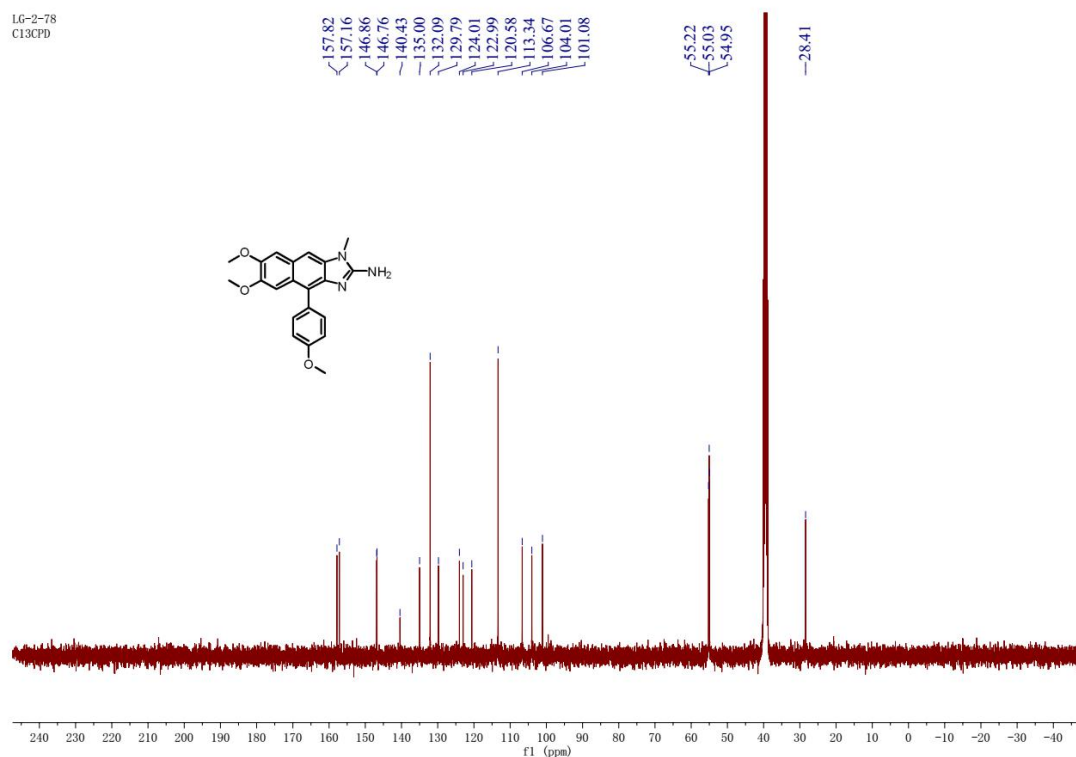

LG-2-92  
PROTON

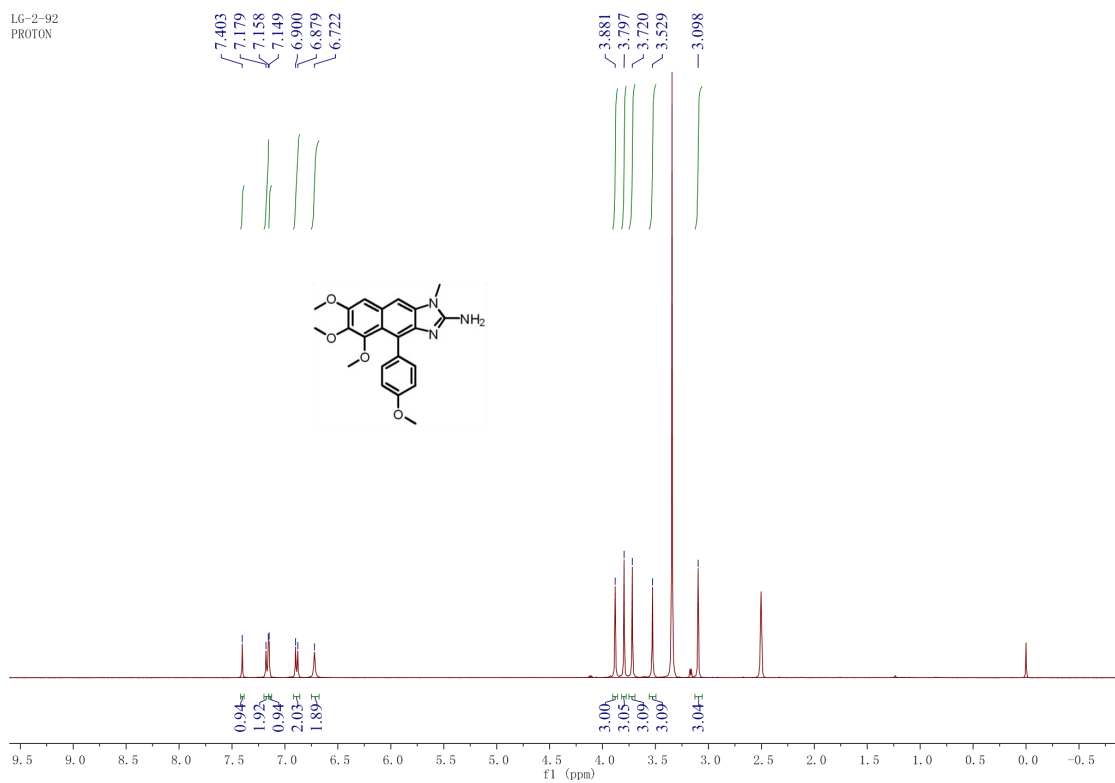

LG-2-92  
C13CPD

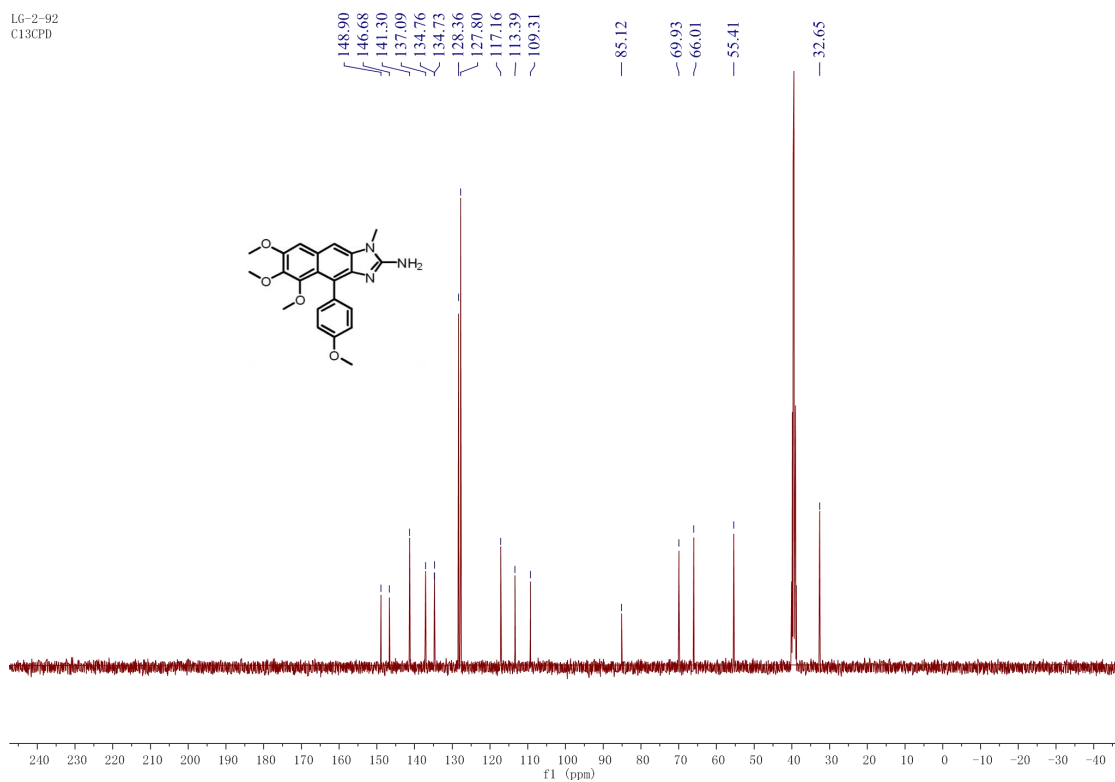

LG-2-109 (2)  
test

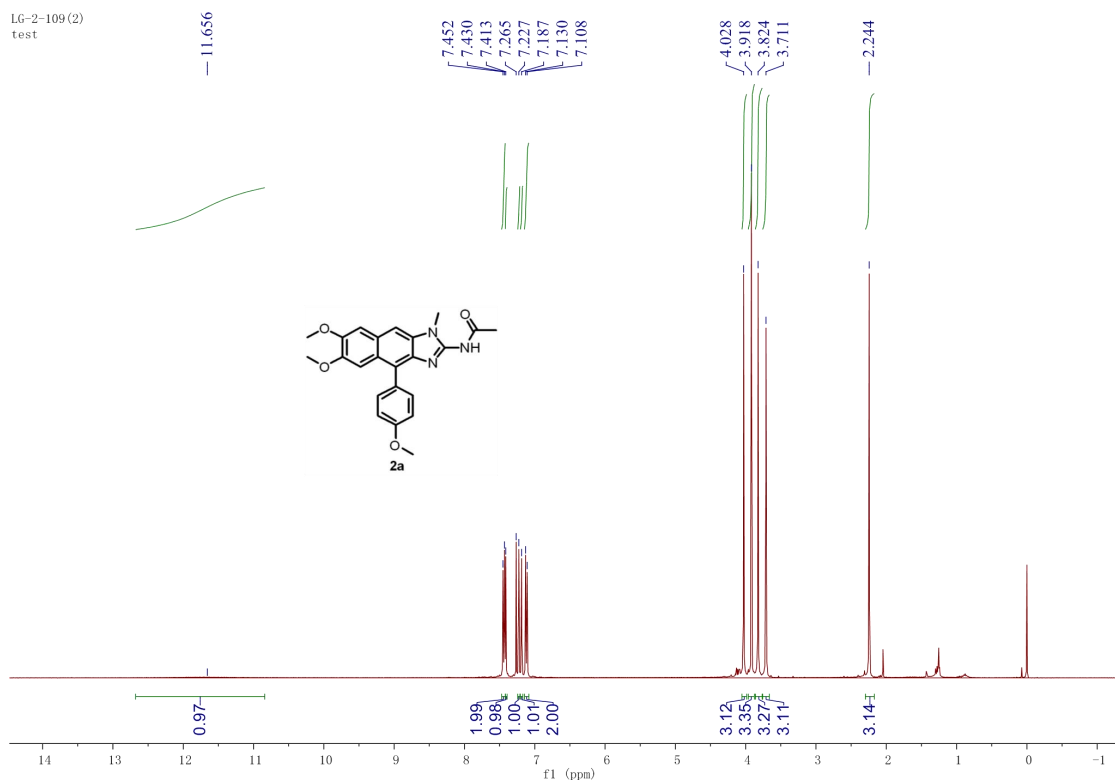

LG-2-109 (2)  
test

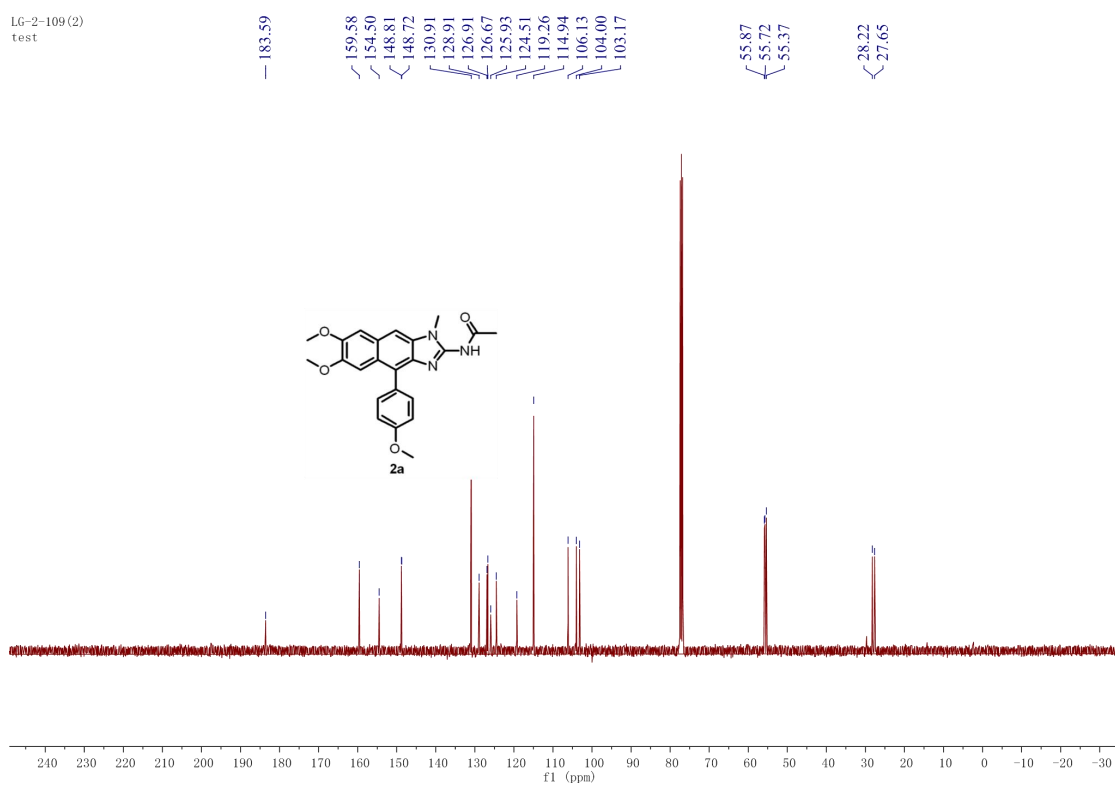



| Sample Name   | Sample37     | Position    | P2-E1     | Instrument Name | Instrument 1 | User Name              |                      |
|---------------|--------------|-------------|-----------|-----------------|--------------|------------------------|----------------------|
| Inj Vol       | -1           | InjPosition |           | SampleType      | Sample       | IRM Calibration Status | Some Ions Missed     |
| Data Filename | LG-2-109-1.d | ACQ Method  | chen-ms.m | Comment         |              | Acquired Time          | 9/14/2016 7:46:05 AM |

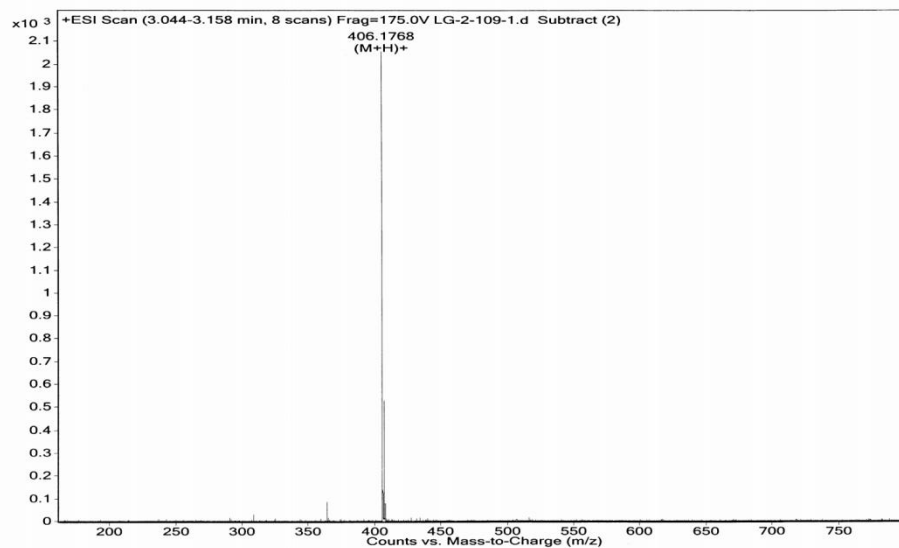

lg-2-188  
test

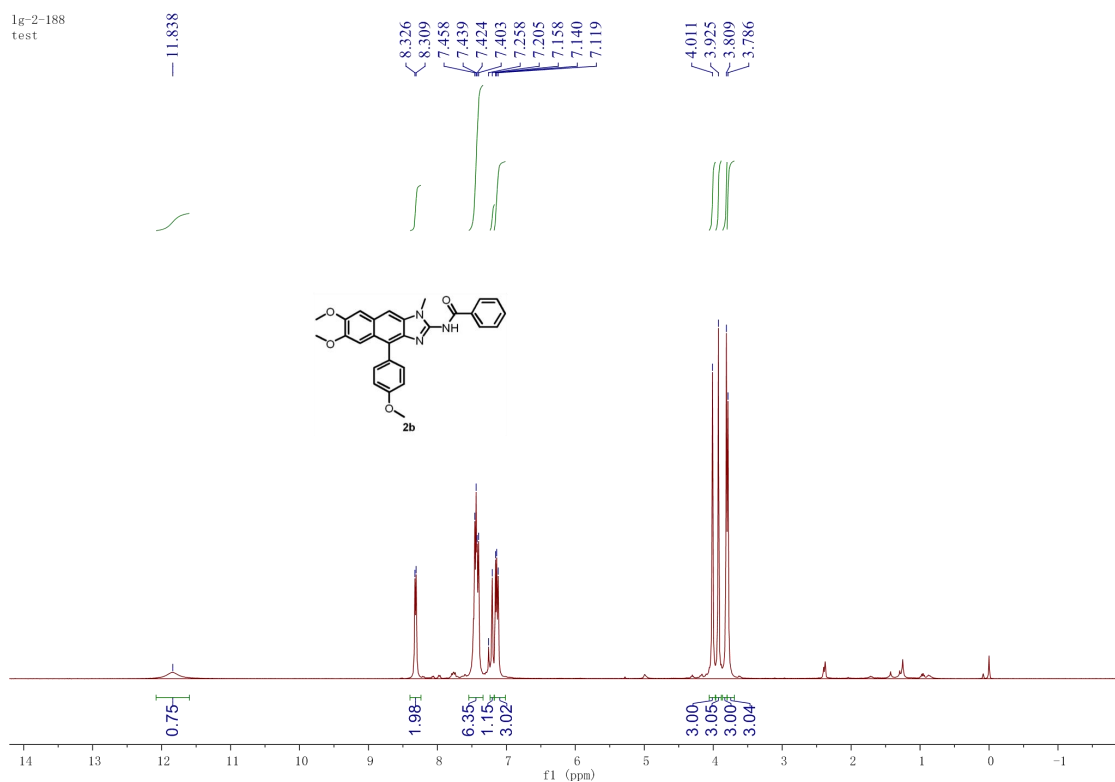

lg-2-188  
test

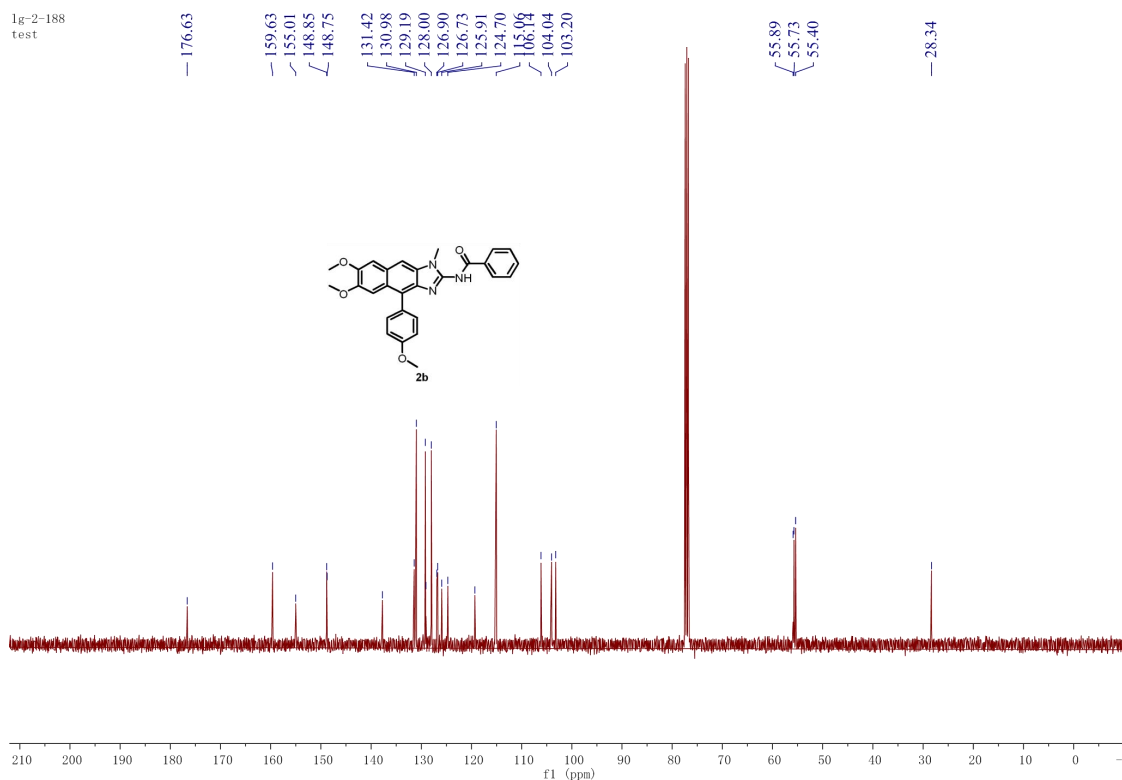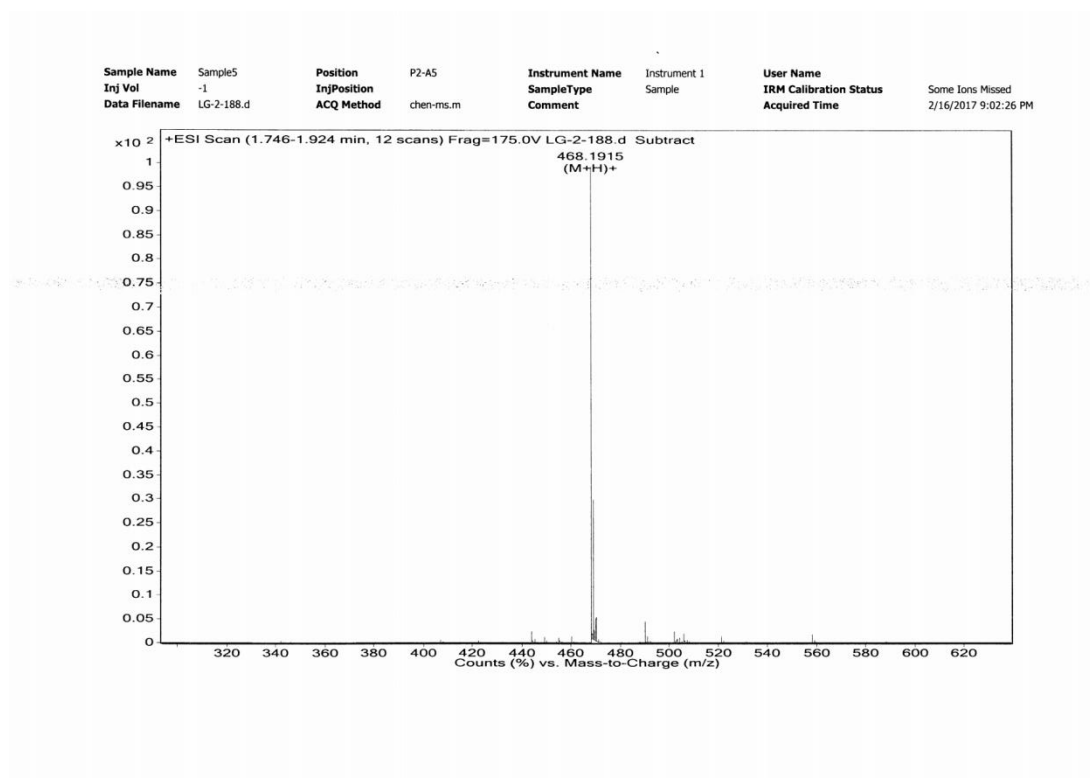

LG-3-3  
PROTON

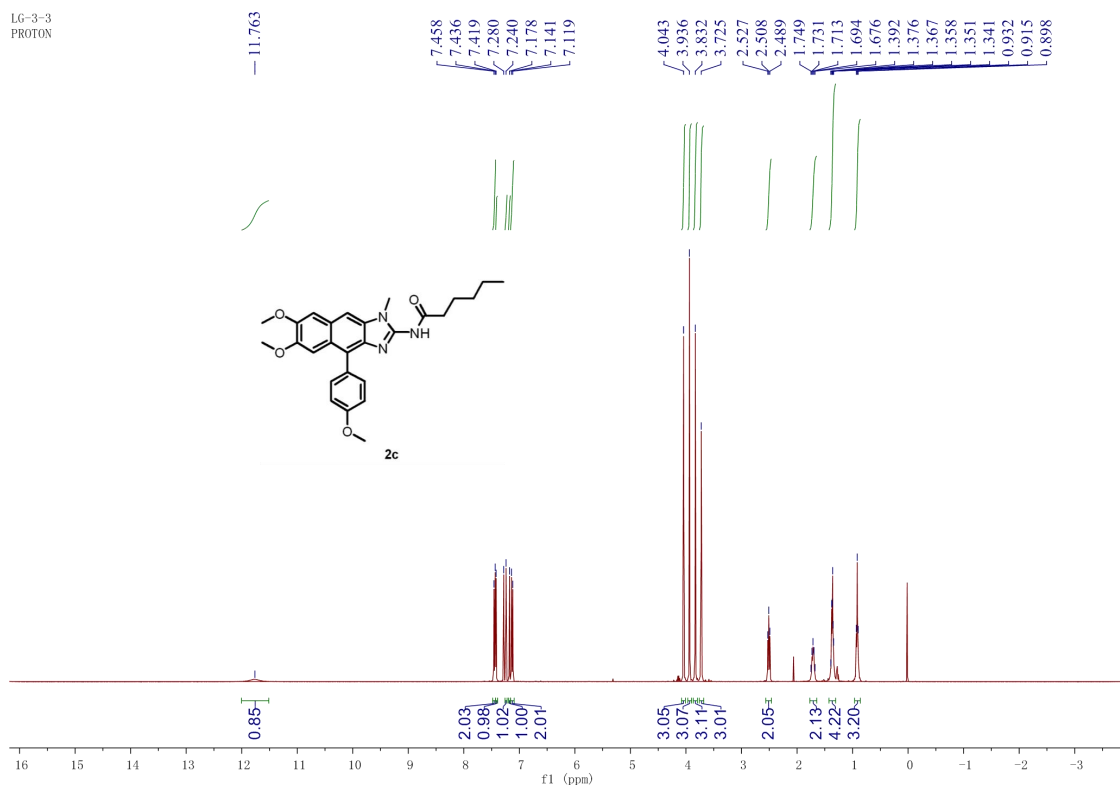

LG-3-3-C  
test

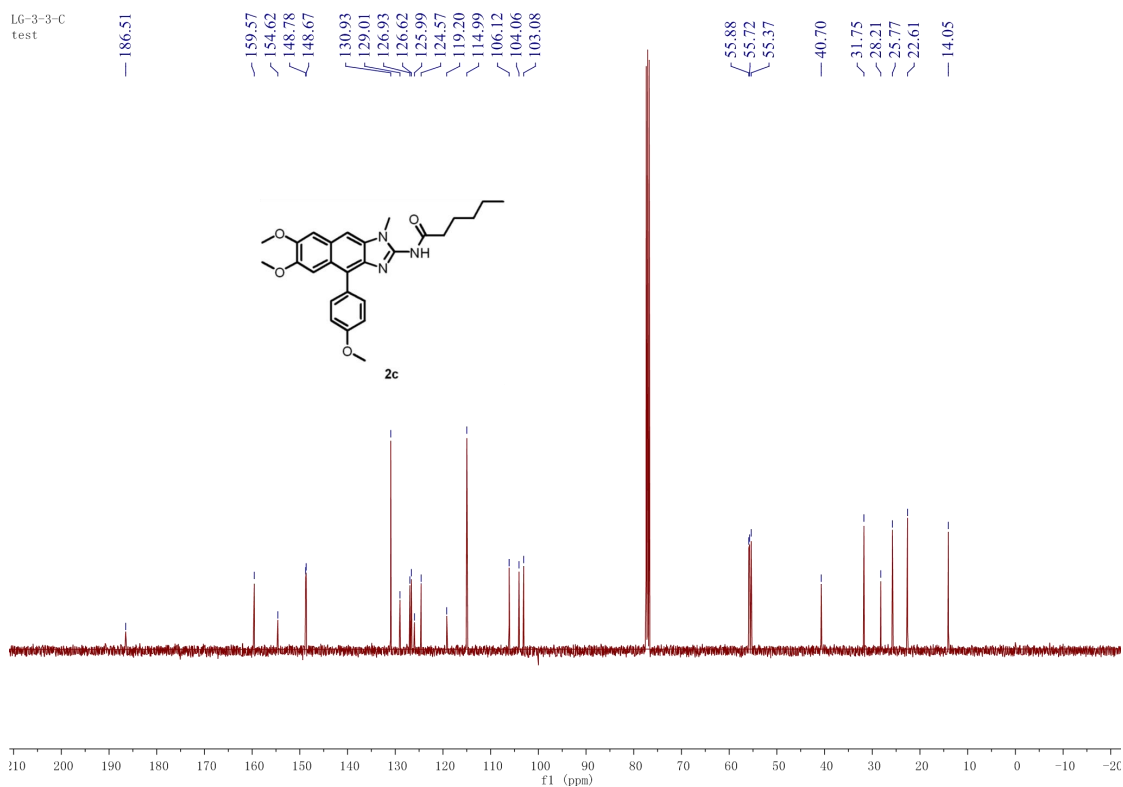

| Sample Name   | Sample13 | Position    | P1-B4     | Instrument Name | Instrument 1 | User Name              |                       |
|---------------|----------|-------------|-----------|-----------------|--------------|------------------------|-----------------------|
| Inj Vol       | -1       | InjPosition |           | SampleType      | Sample       | IRM Calibration Status | Some Ions Missed      |
| Data Filename | LG-3-3.d | ACQ Method  | chen-ms.m | Comment         |              | Acquired Time          | 11/16/2016 5:54:29 PM |

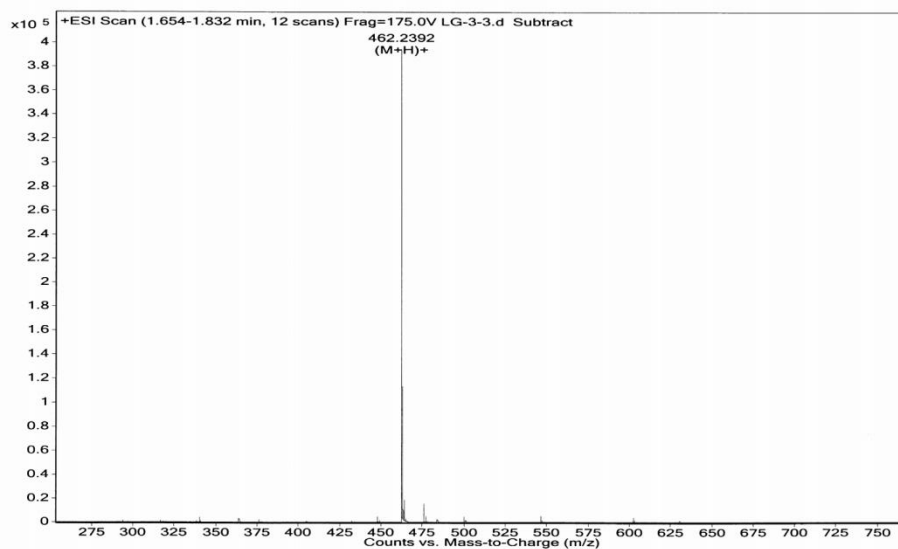

LG-3-1  
test

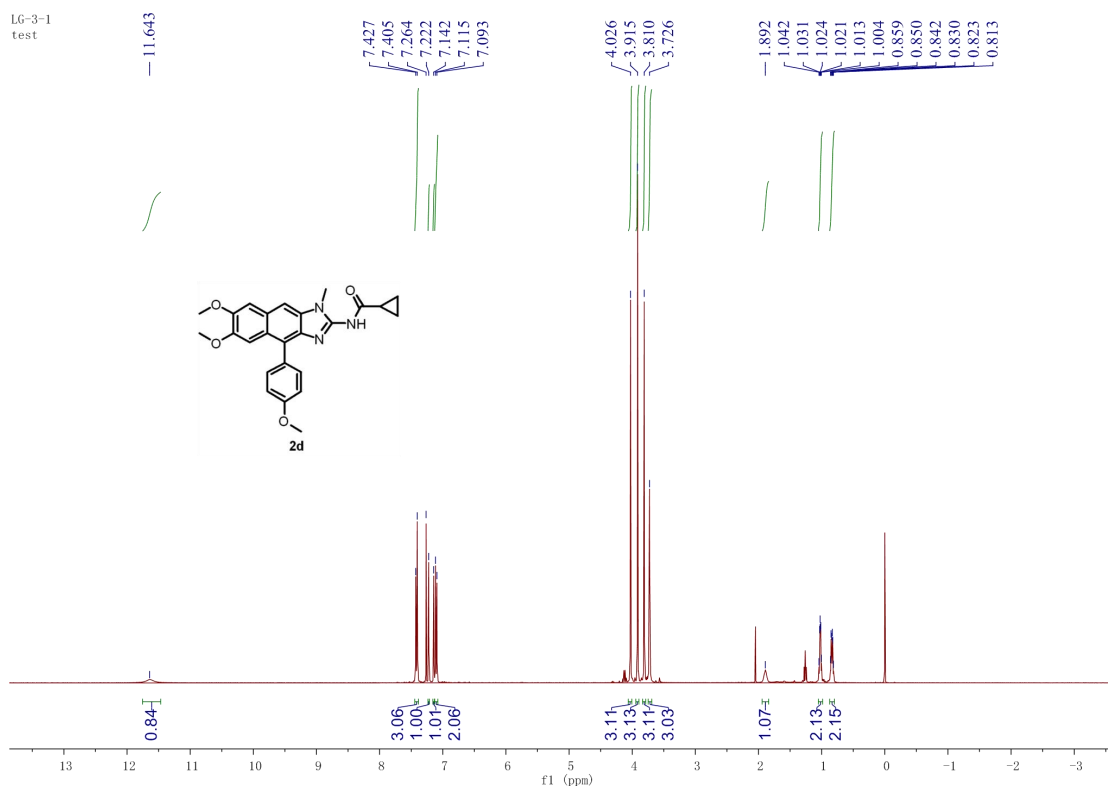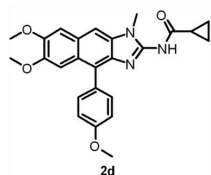

LG-3-1-C  
test

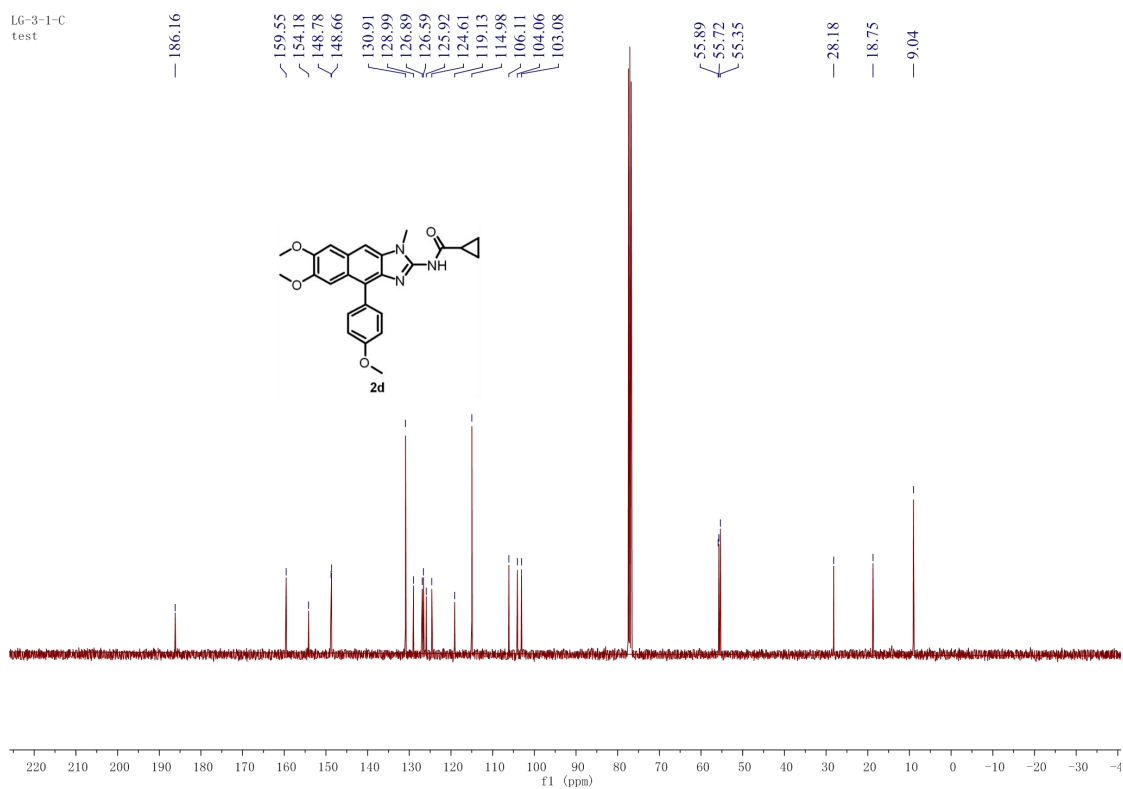

| Sample Name   | Sample12 | Position    | P1-B3     | Instrument Name | Instrument 1 | User Name              |
|---------------|----------|-------------|-----------|-----------------|--------------|------------------------|
| Inj Vol       | -1       | InjPosition |           | SampleType      | Sample       | IRM Calibration Status |
| Data Filename | LG-3-1.d | ACQ Method  | chen-ms.m | Comment         |              | Acquired Time          |

Some Ions Missed  
11/16/2016 5:48:47 PM

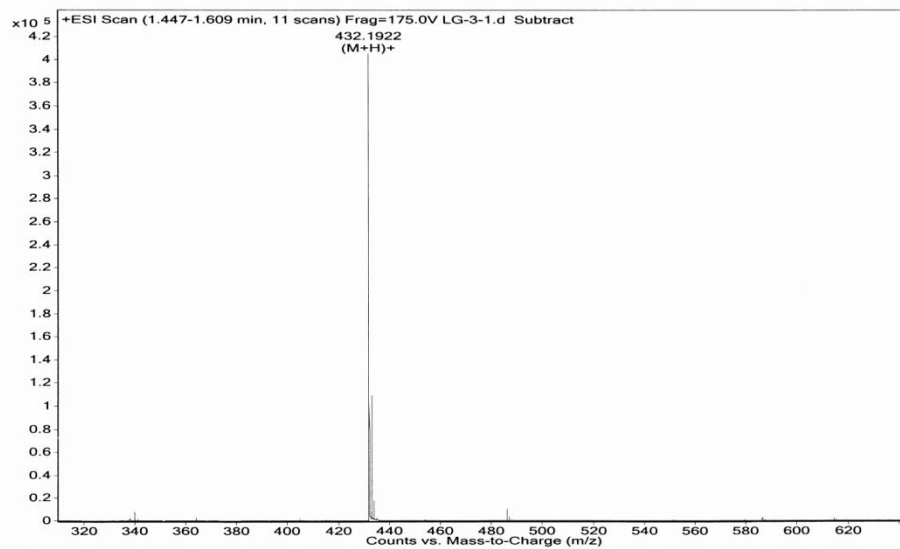

LG-3-17-H  
PROTON

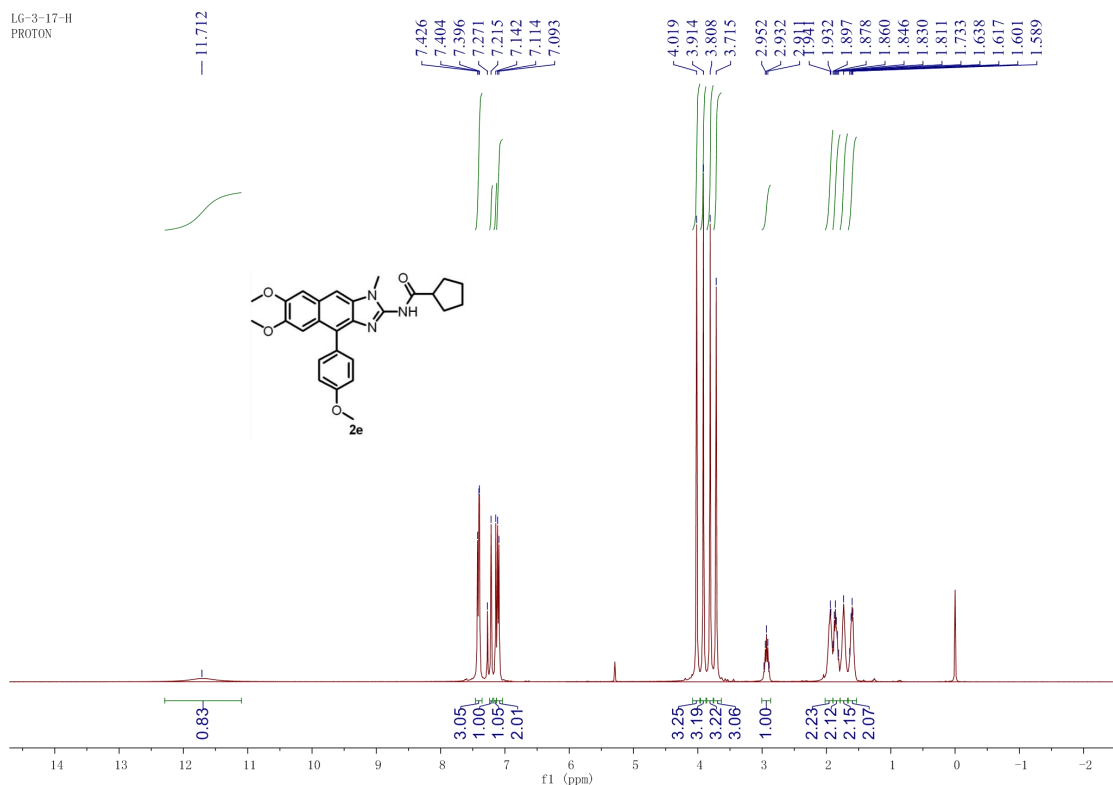

LG-3-17-C  
C13CPD

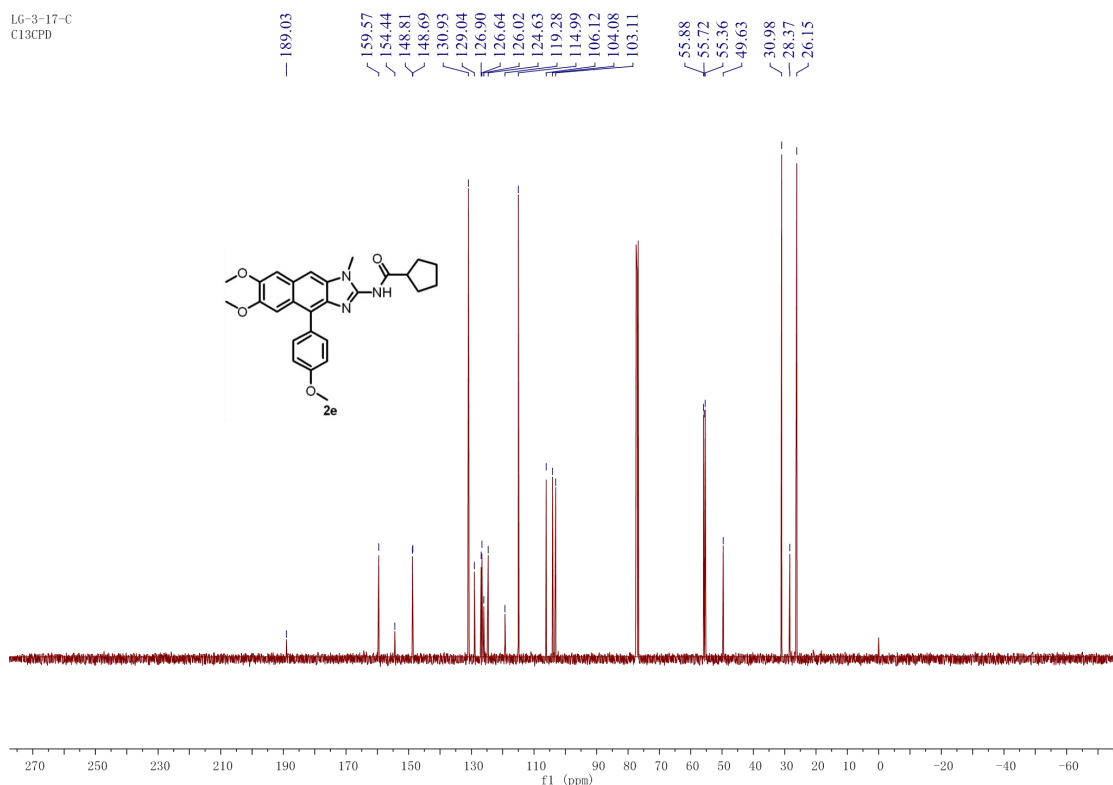

| Sample Name   | Sample16  | Position    | P1-B7     | Instrument Name | Instrument 1 | User Name              |                       |
|---------------|-----------|-------------|-----------|-----------------|--------------|------------------------|-----------------------|
| Inj Vol       | -1        | InjPosition |           | SampleType      | Sample       | IRM Calibration Status | Some Ions Missed      |
| Data Filename | LG-3-17.d | ACQ Method  | chen-ms.m | Comment         |              | Acquired Time          | 11/16/2016 6:11:33 PM |

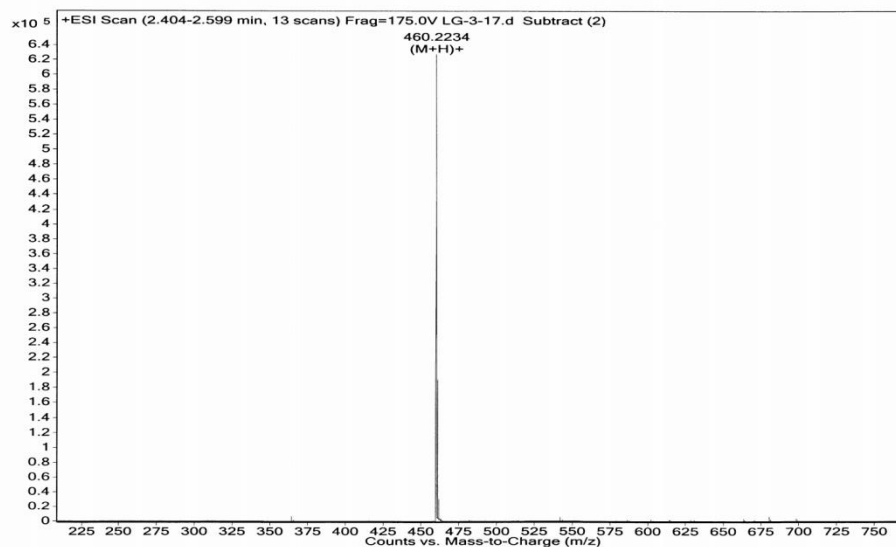

LG-3-71-2  
PROTON

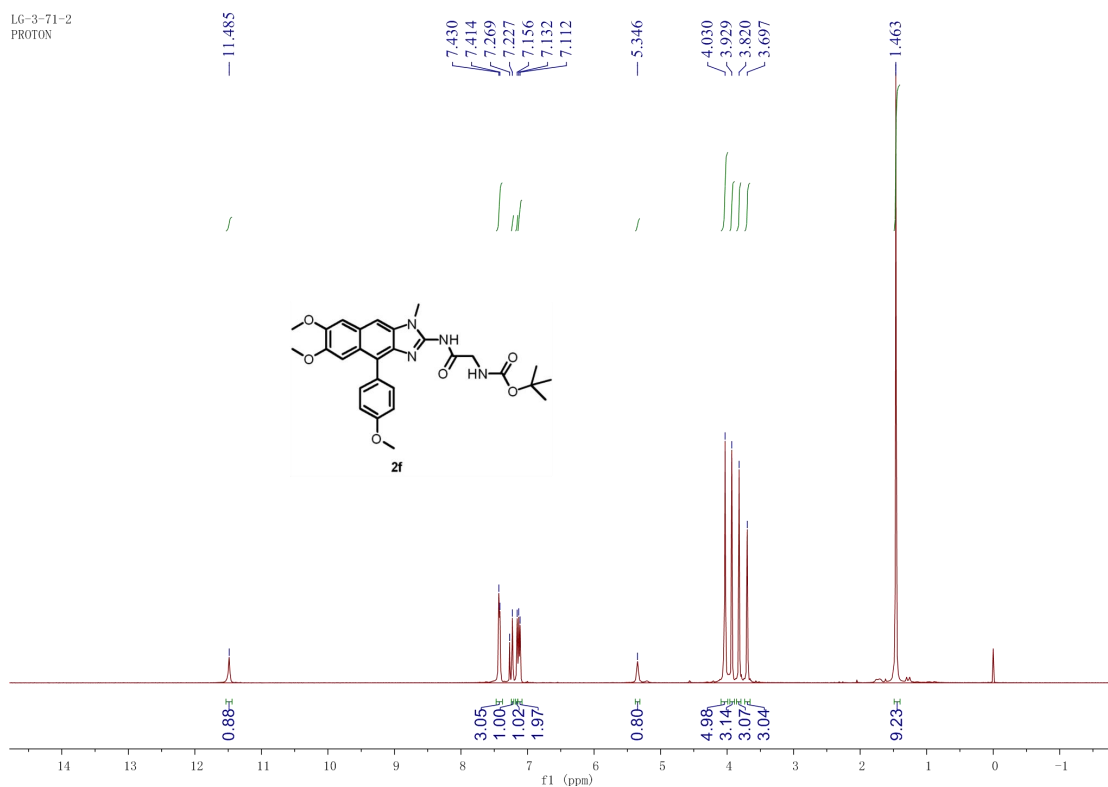

LG-3-71-2  
C13CPD

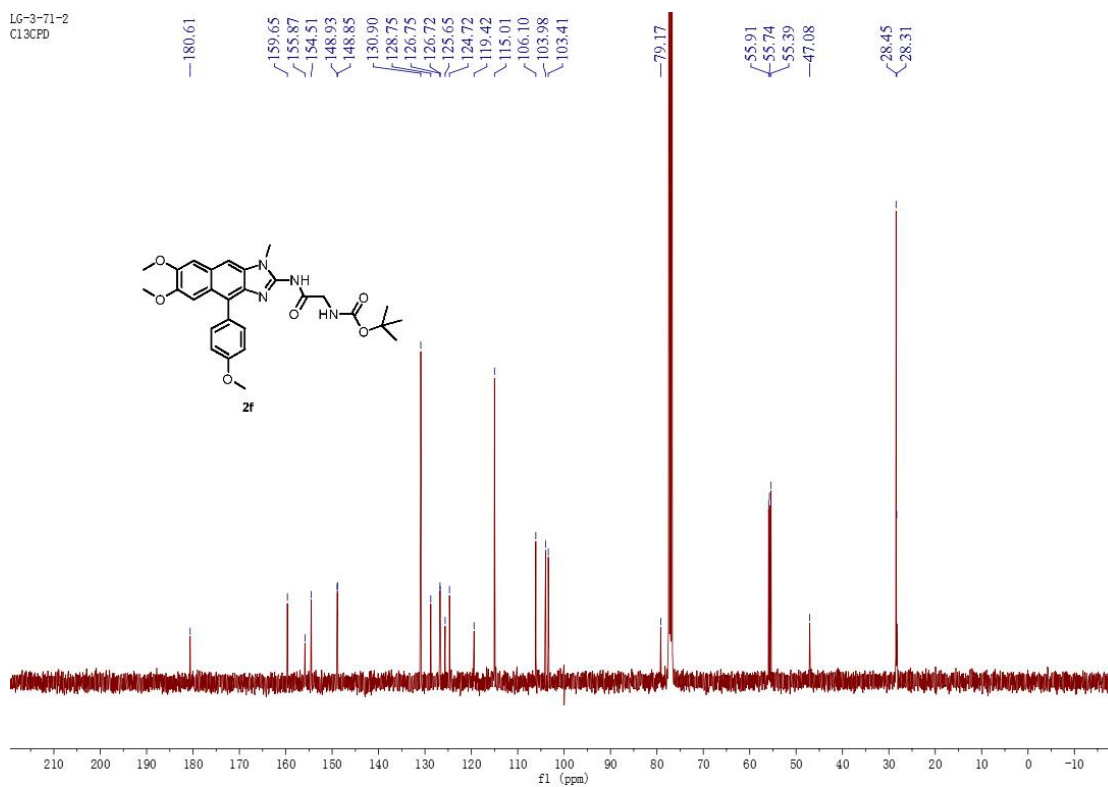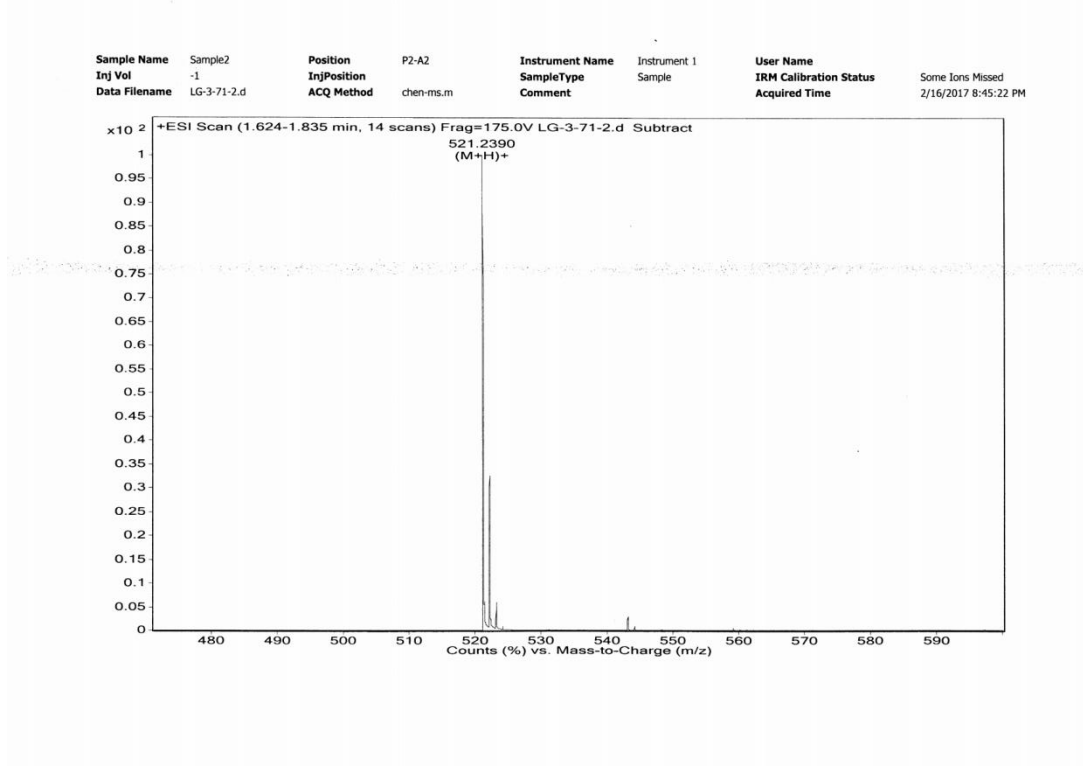



LG-3-60-1  
PROTON

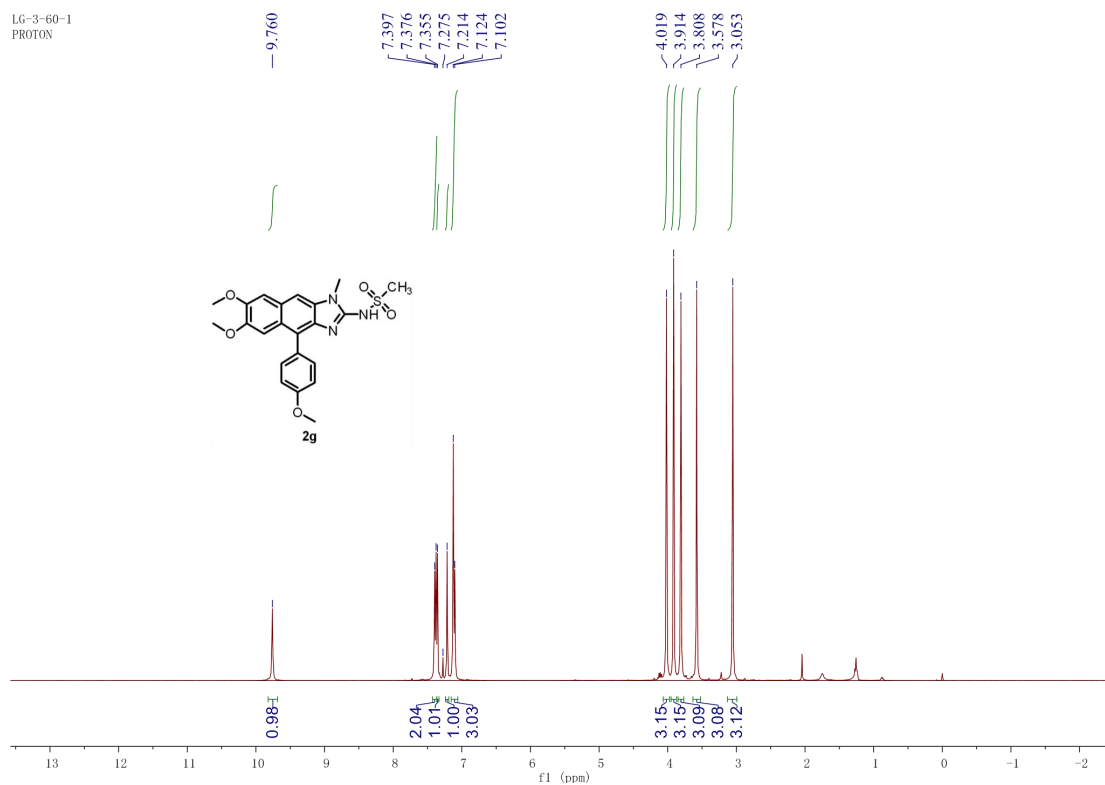

LG-3-60-1  
C13CPD

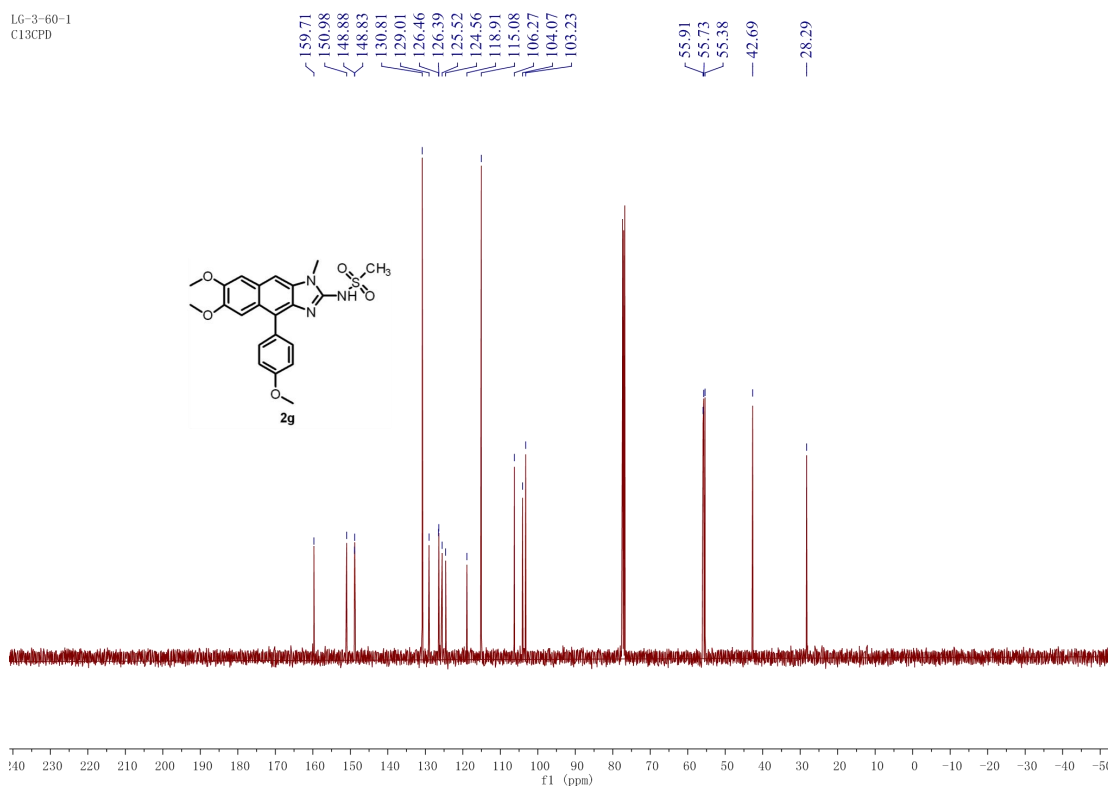

| Sample Name | Position    | Instrument Name | User Name            |
|-------------|-------------|-----------------|----------------------|
| Sample46    | P1-F1-      | Instrument 1    |                      |
| Inj Vol     | InjPosition | SampleType      | Calibration Status   |
| -1          |             | Sample          |                      |
| Data File   | ACQ Method  | Comment         | Acquired Time        |
| LG-3-60.d   | chen-ms.f1  |                 | 2/16/2017 7:48:34 PM |

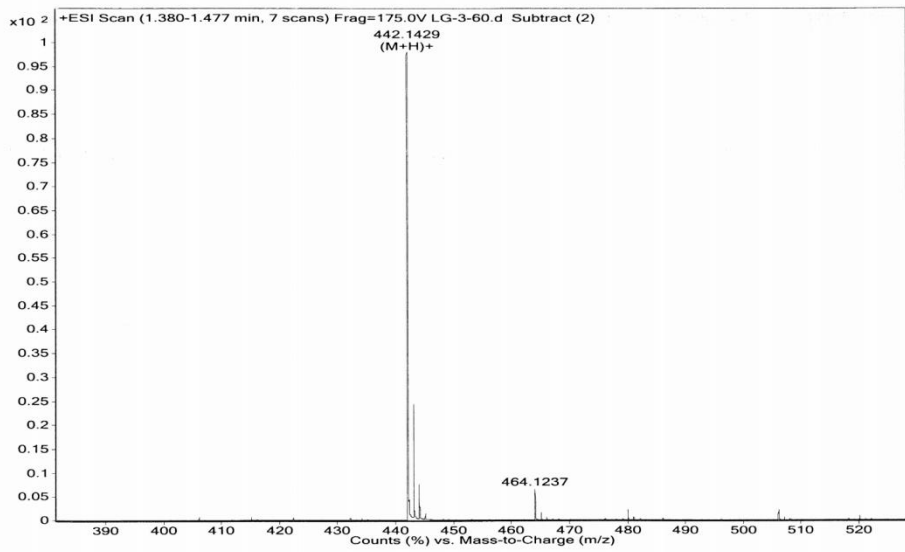

LG-3-62-2  
PROTON

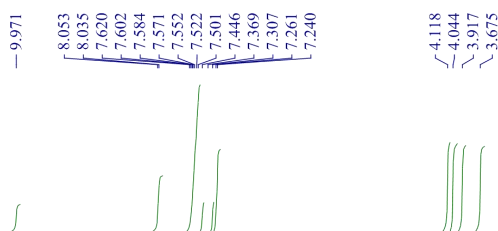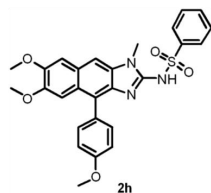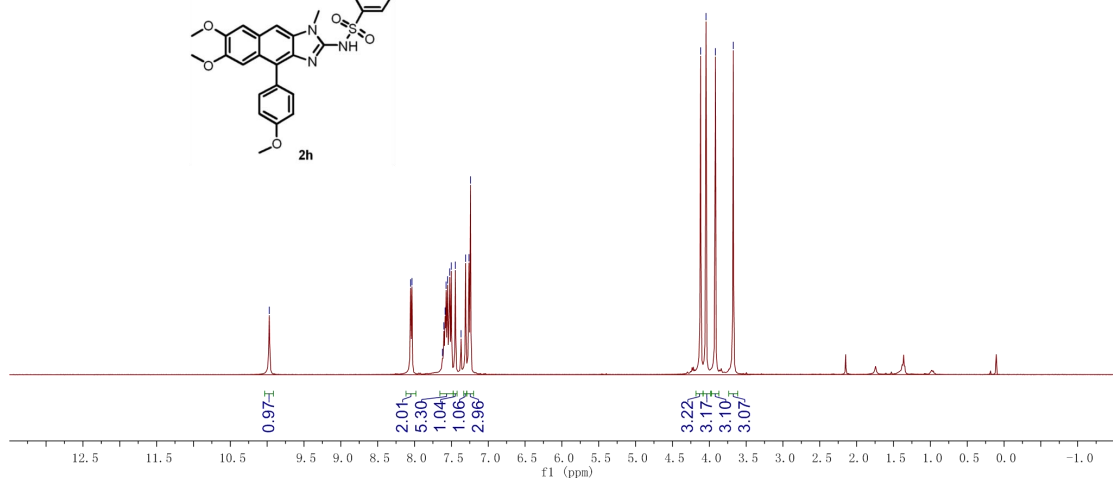

LG-3-62-2  
C13CPD

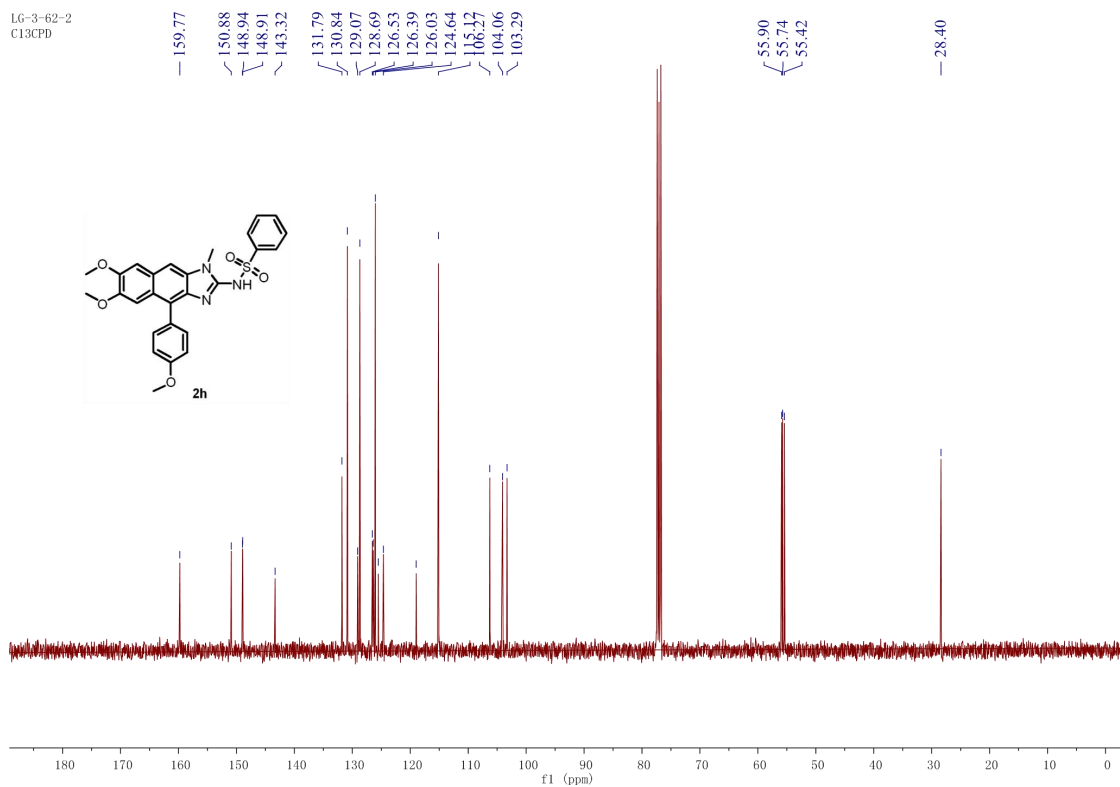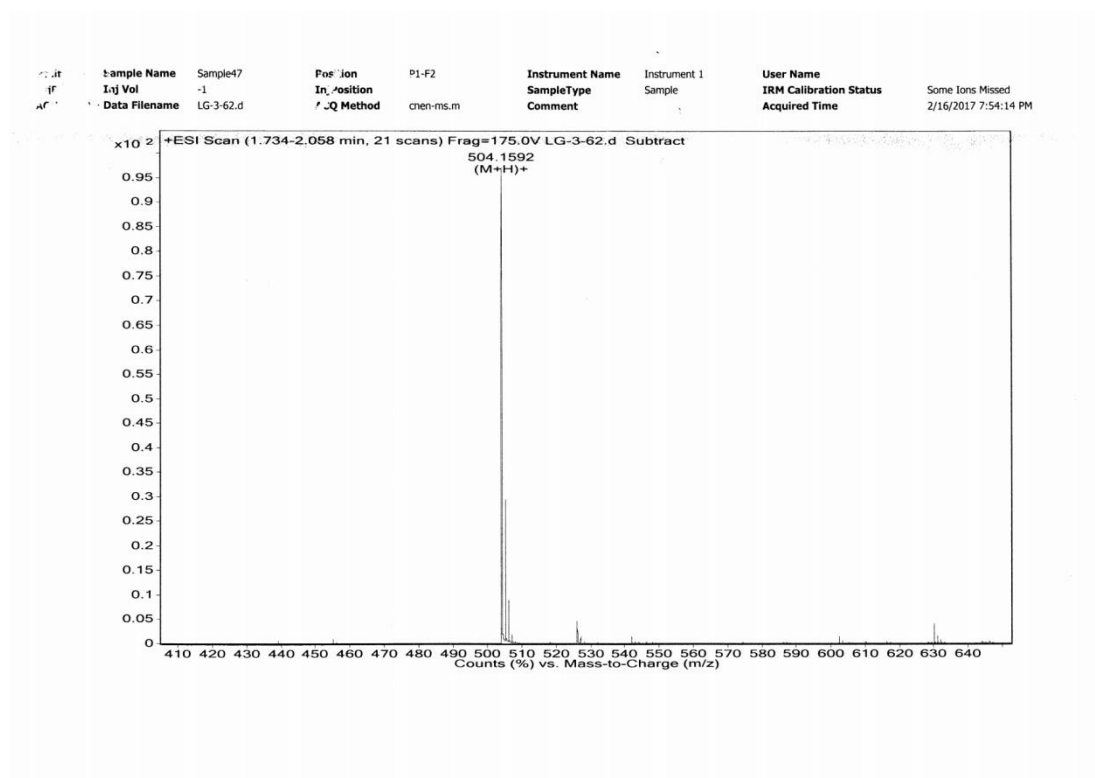

LG-3-48  
PROTON

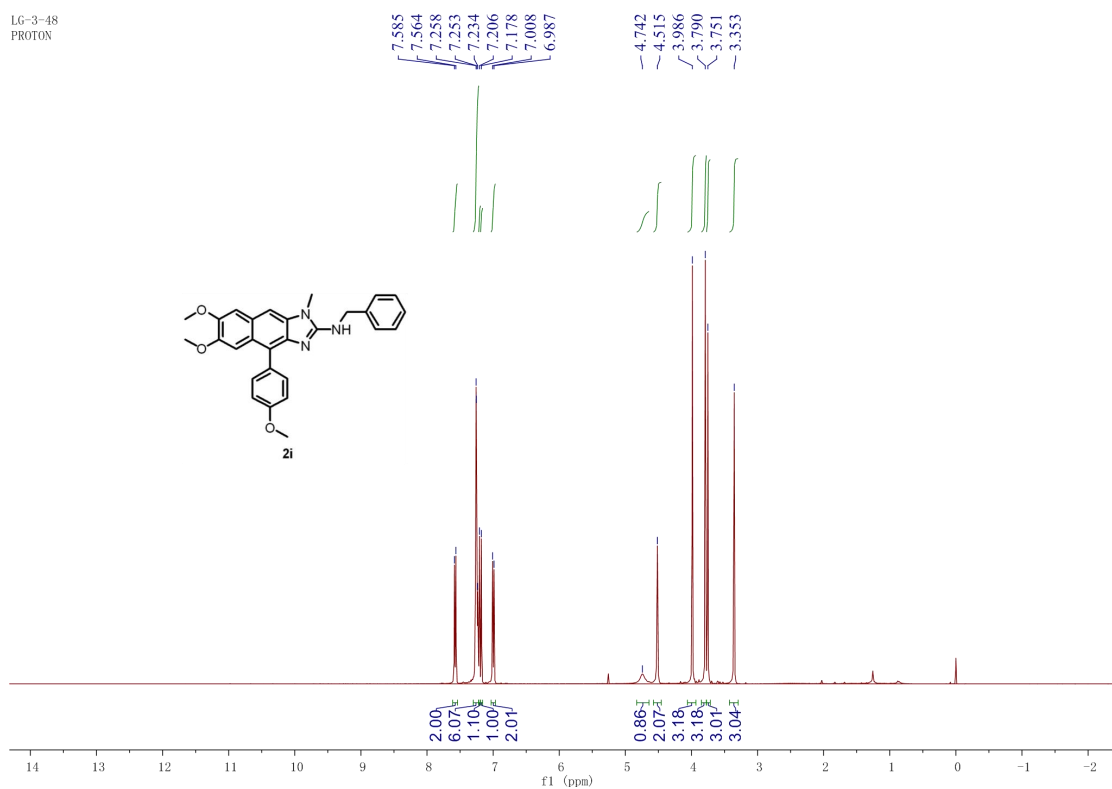

LG-3-48  
C13CPD

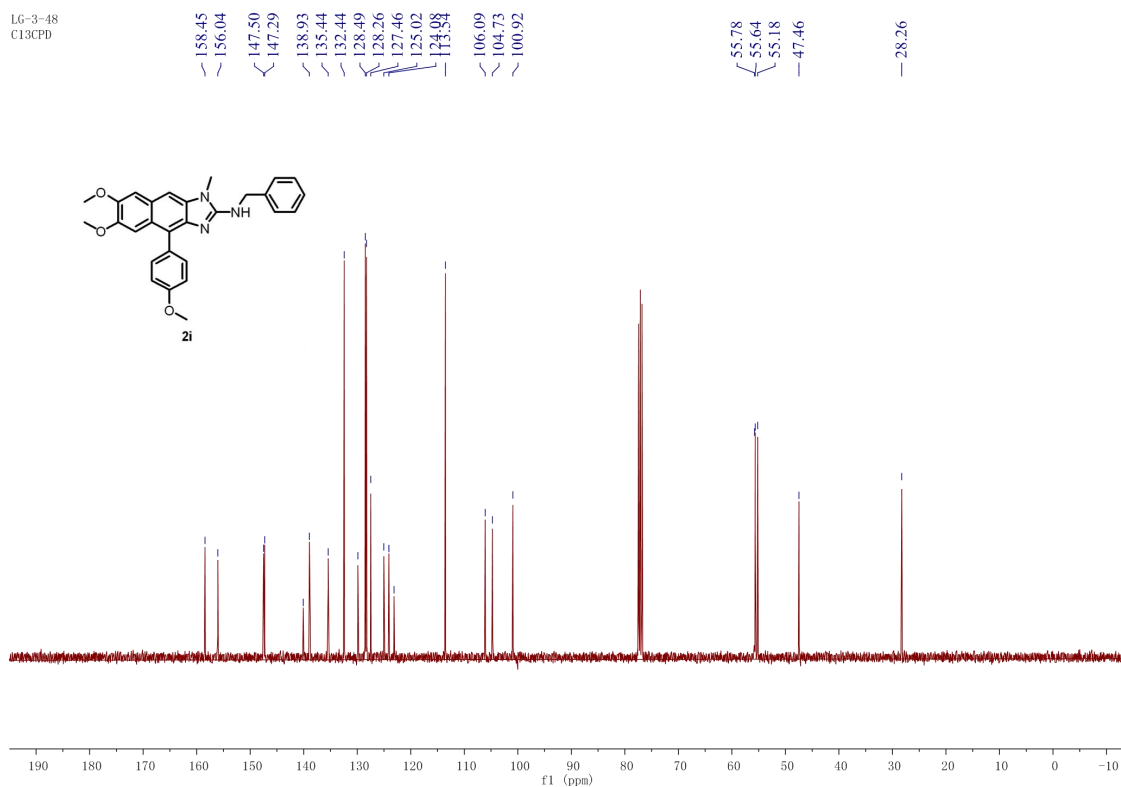

| Sample Name   | Sample53  | Position    | P1-F8     | Instrument Name | Instrument 1 | User Name              |
|---------------|-----------|-------------|-----------|-----------------|--------------|------------------------|
| Inj Vol       | -1        | InjPosition |           | SampleType      | Sample       | IRM Calibration Status |
| Data Filename | LG-3-42.d | ACQ Method  | chen-ms.m | Comment         |              | Acquired Time          |

Some Ions Missed  
2/16/2017 8:28:18 PM

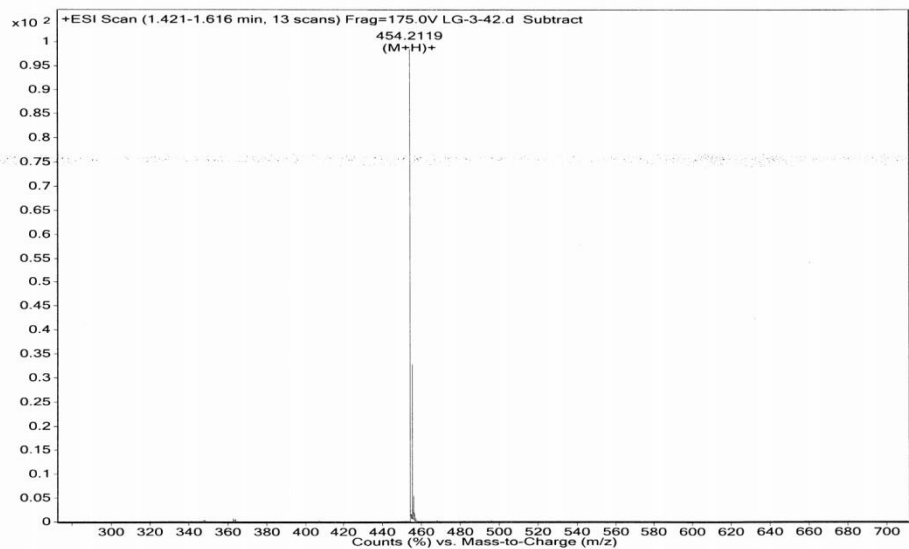

LG-3-43-H  
PROTON

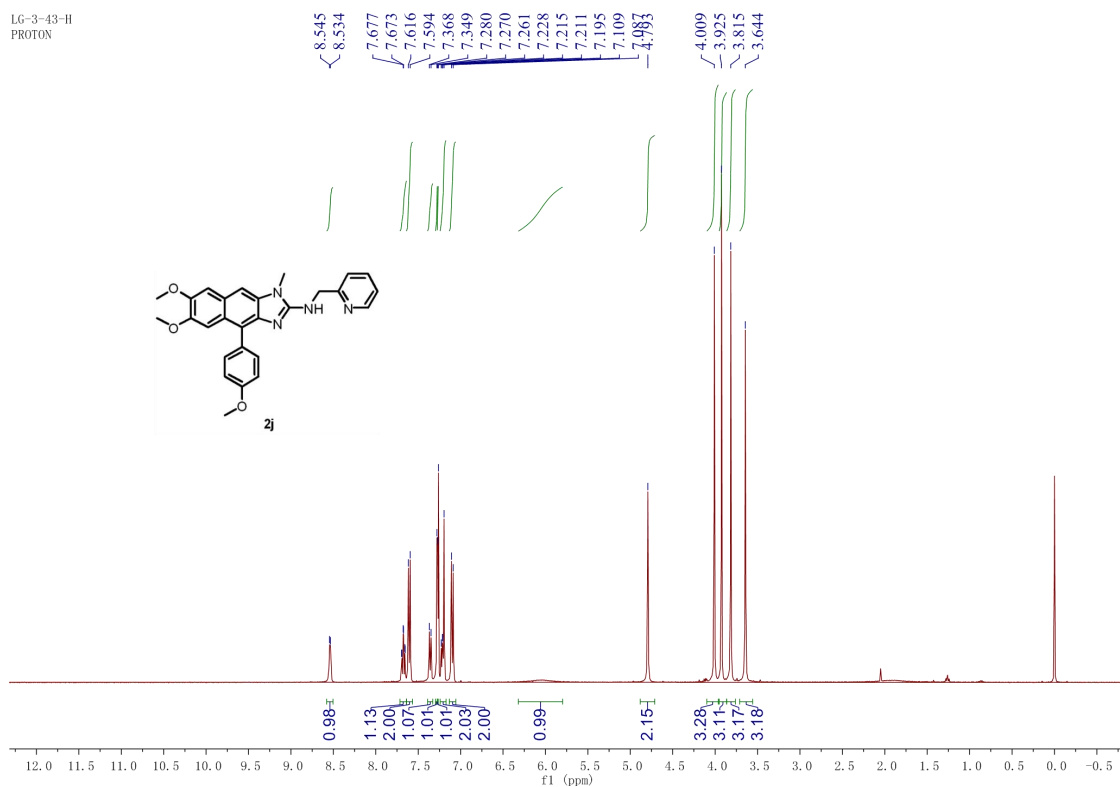

LG-3-43-C  
C13CPD

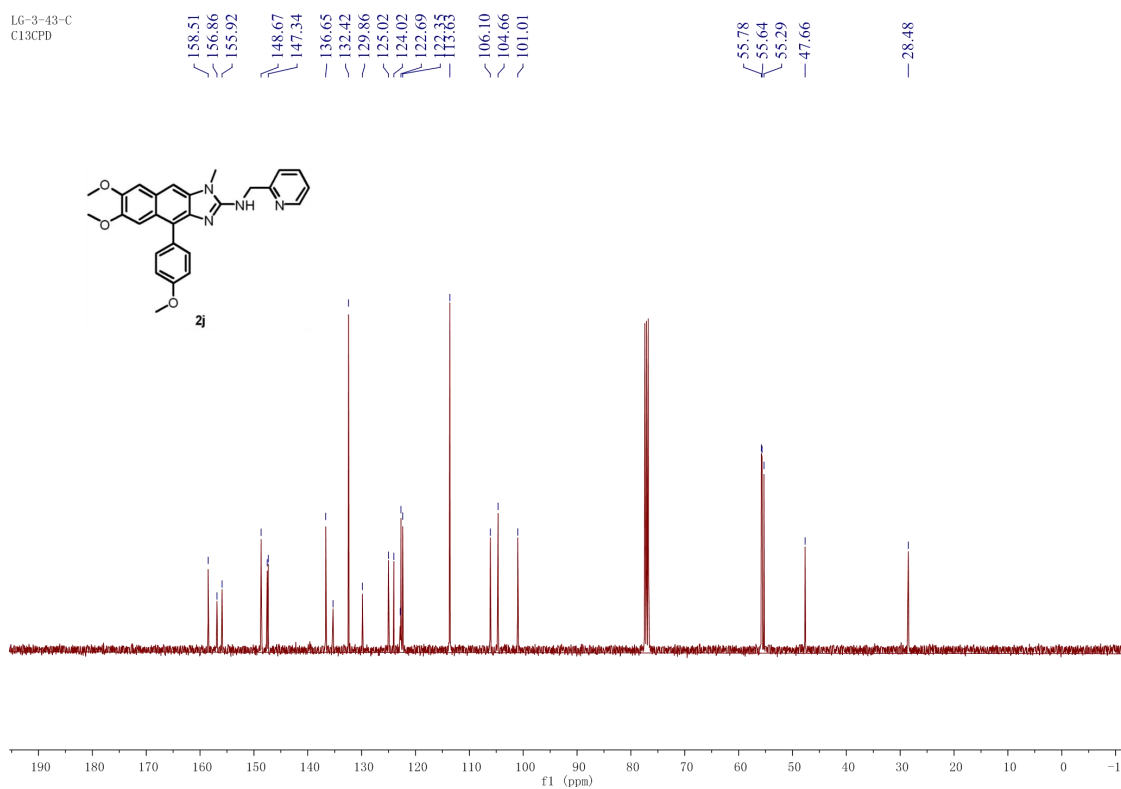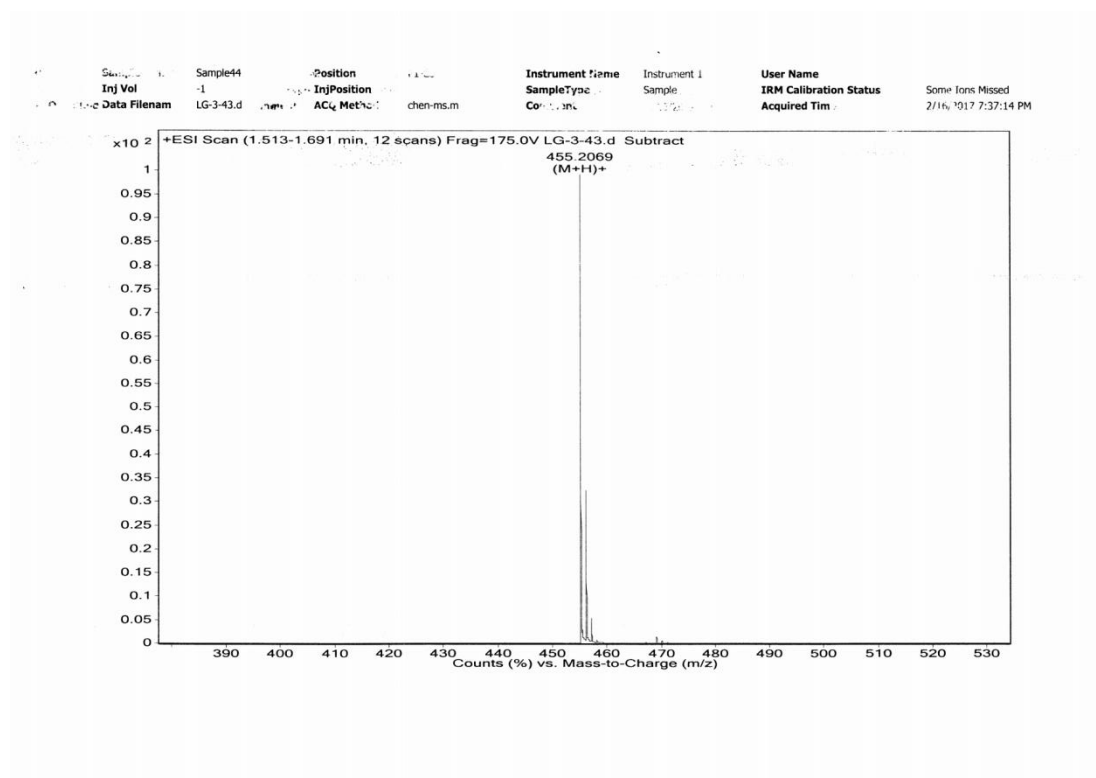

LG-3-93  
PROTON

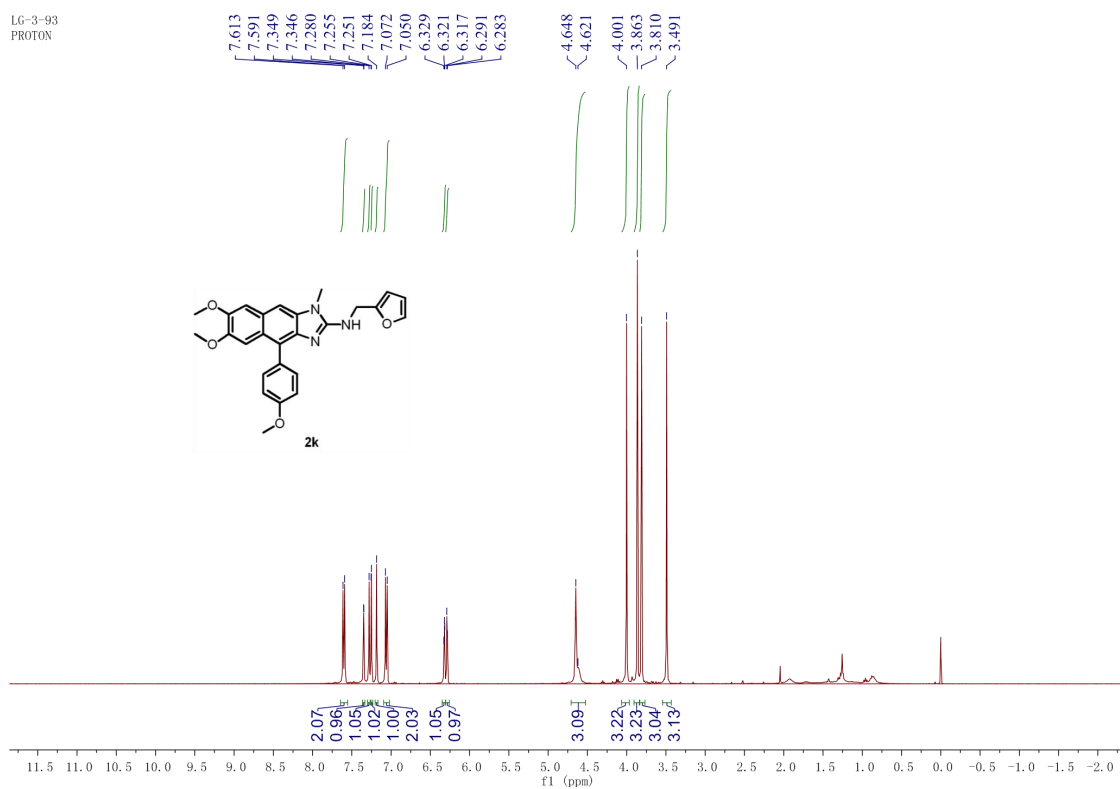

LG-3-93-C  
C13CPD

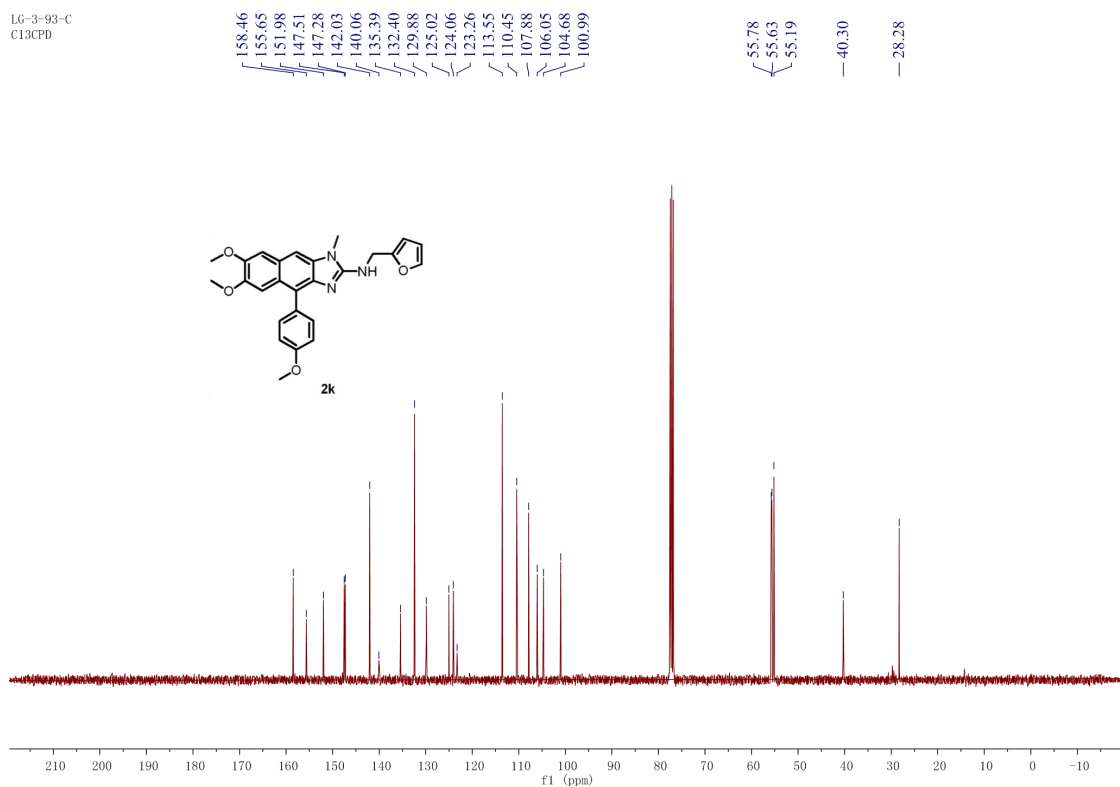

+ESI Scan (1.580-1.727 min, 10 scans) Frag=175.0V LG-3-93.d Subtract

444.1913  
(M+H)<sup>+</sup>

Counts (%) vs. Mass-to-Charge (m/z)

7.645  
7.623  
7.308  
7.261  
7.255  
7.229  
7.217  
7.191  
7.072  
7.050  
7.018  
7.011  
6.955  
6.946  
6.943  
6.934

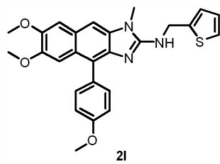



LG-3-91-c  
C13CPD

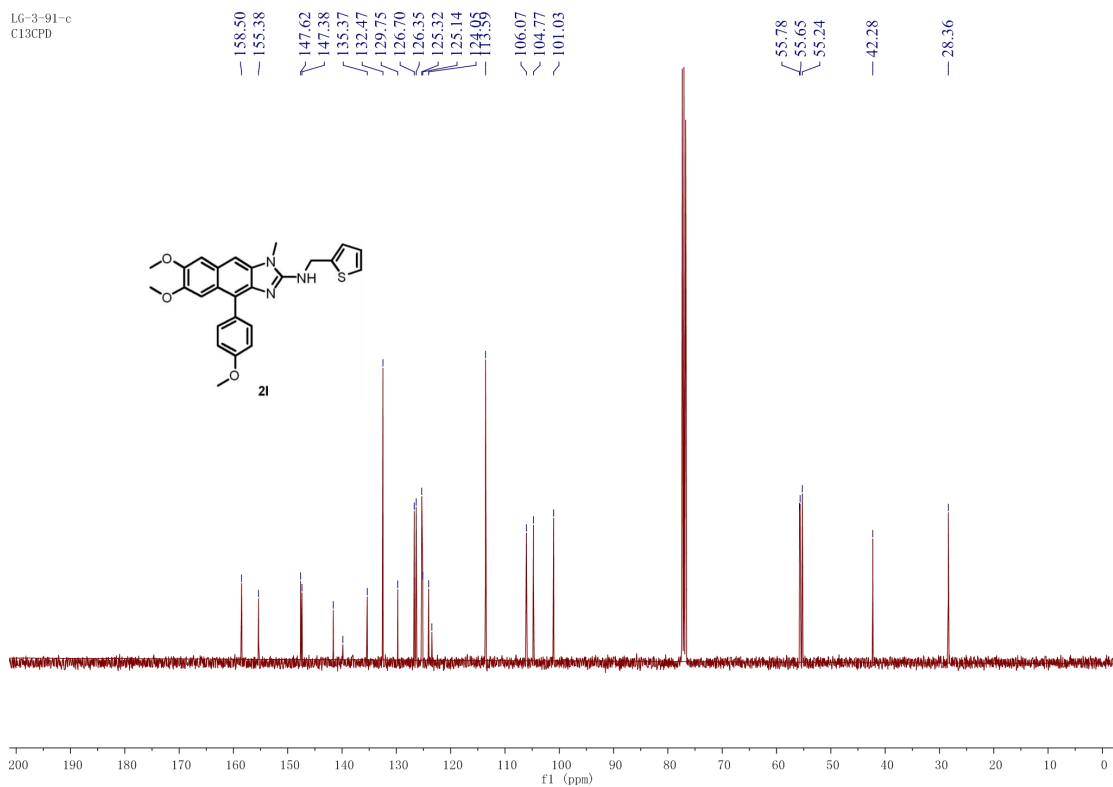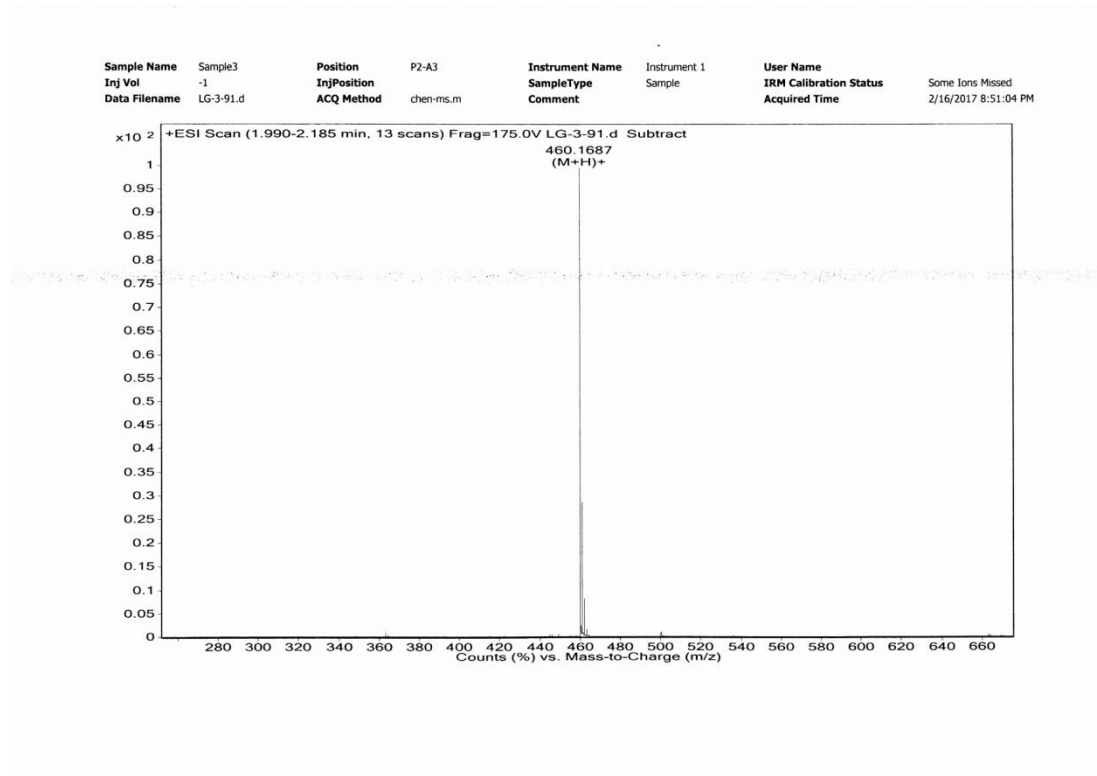

LG-3-92  
PROTON

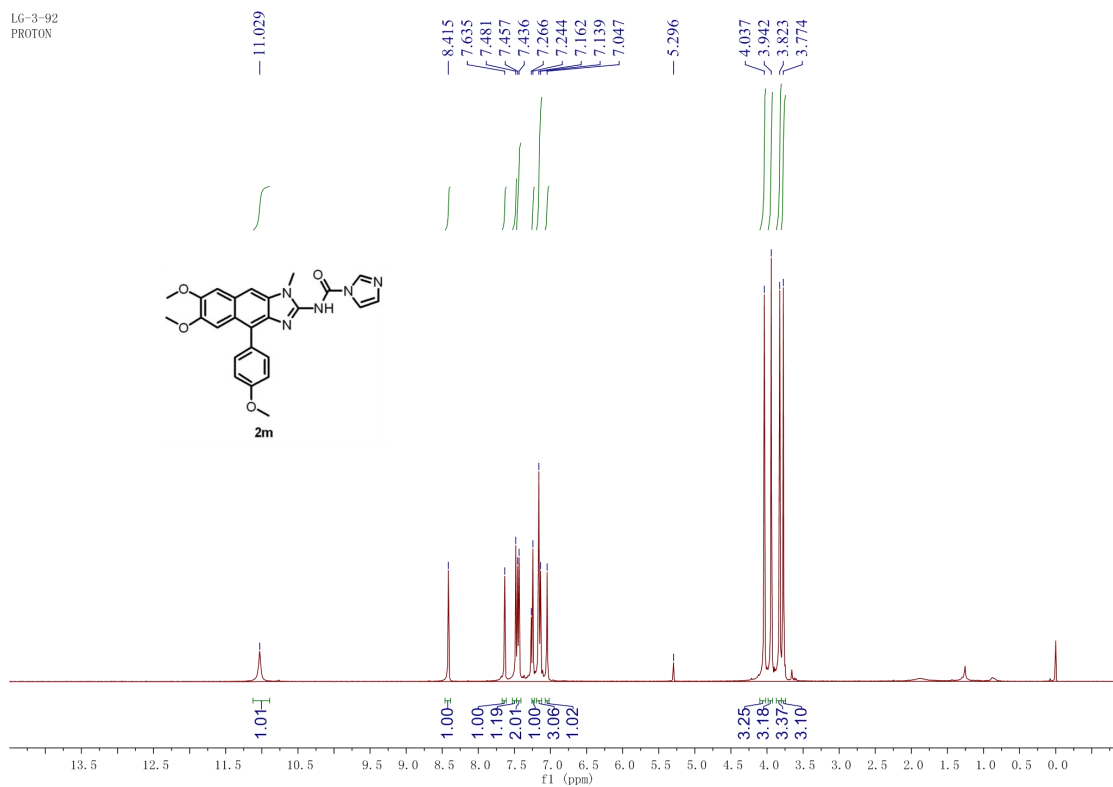

LG-3-92  
C13CPD

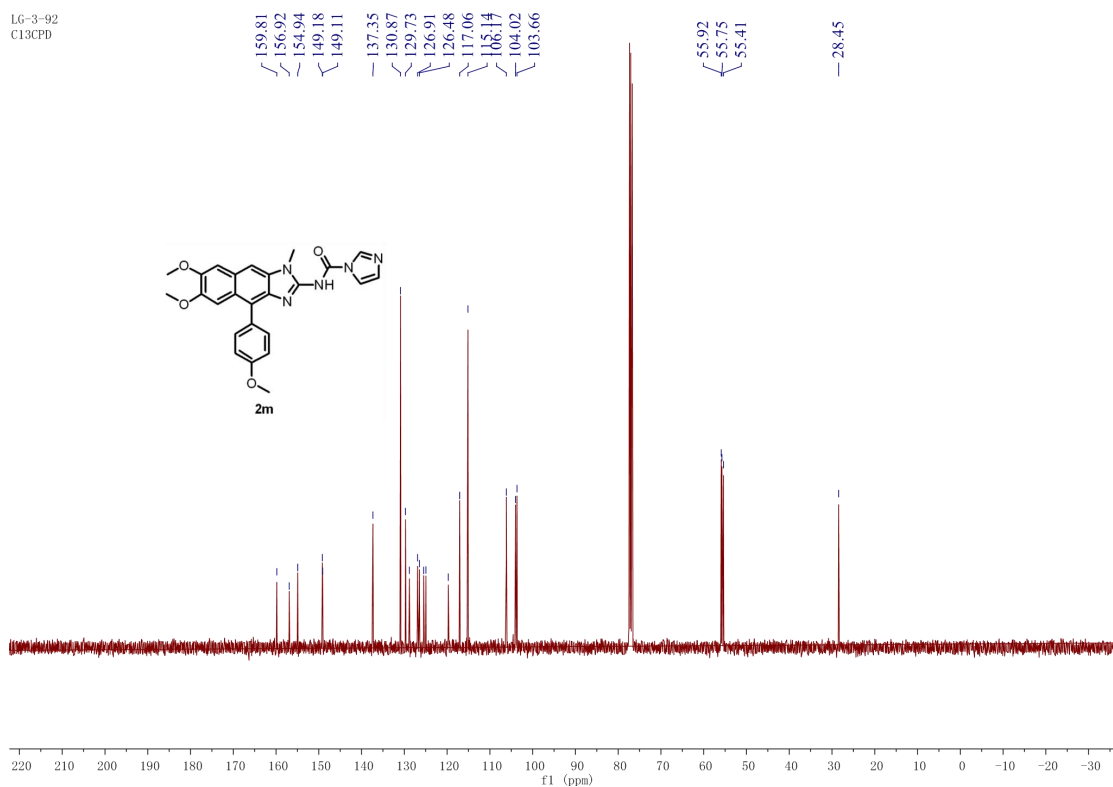

LG-3-94  
PROTON

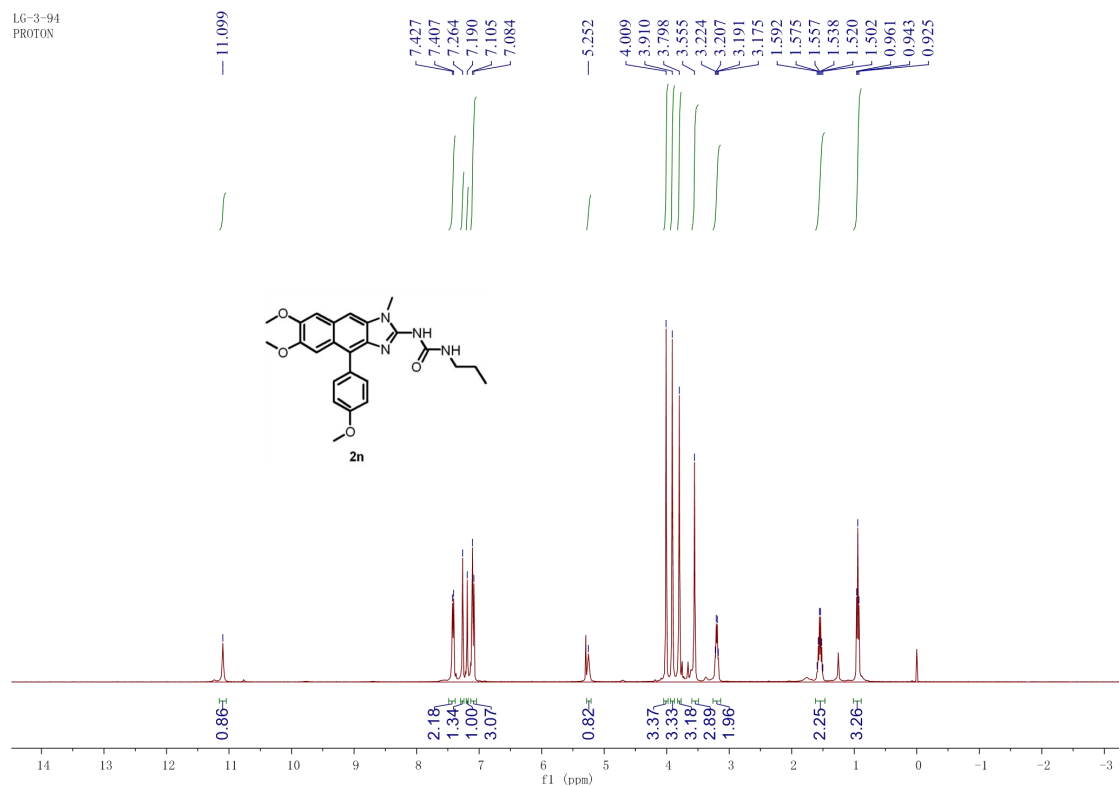

LG-3-94  
C13CPD

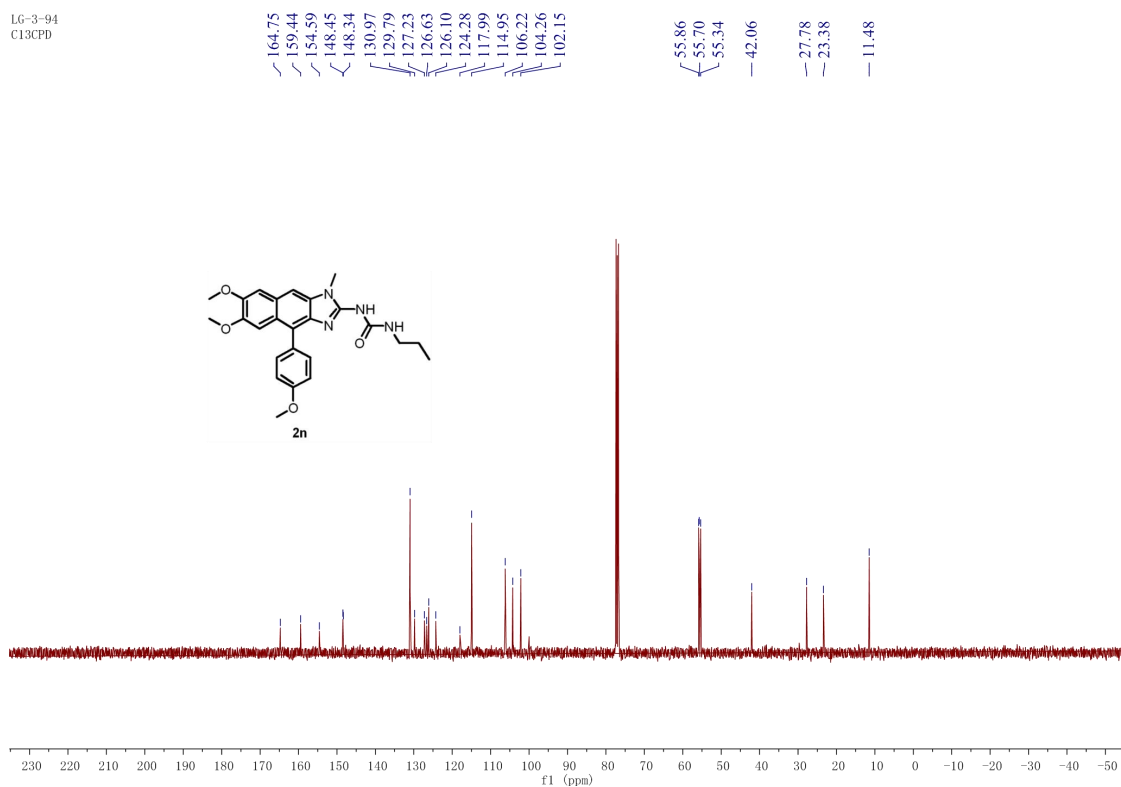

LG-3-98  
PROTON

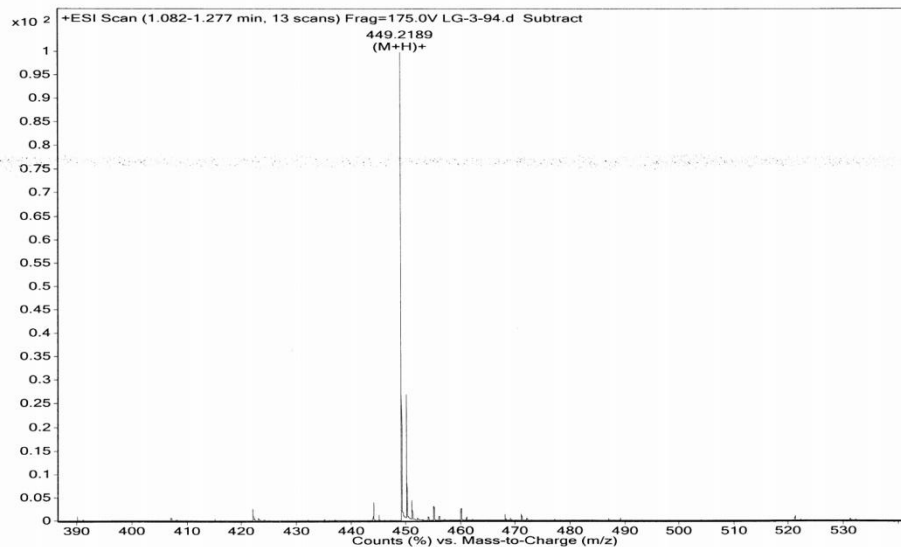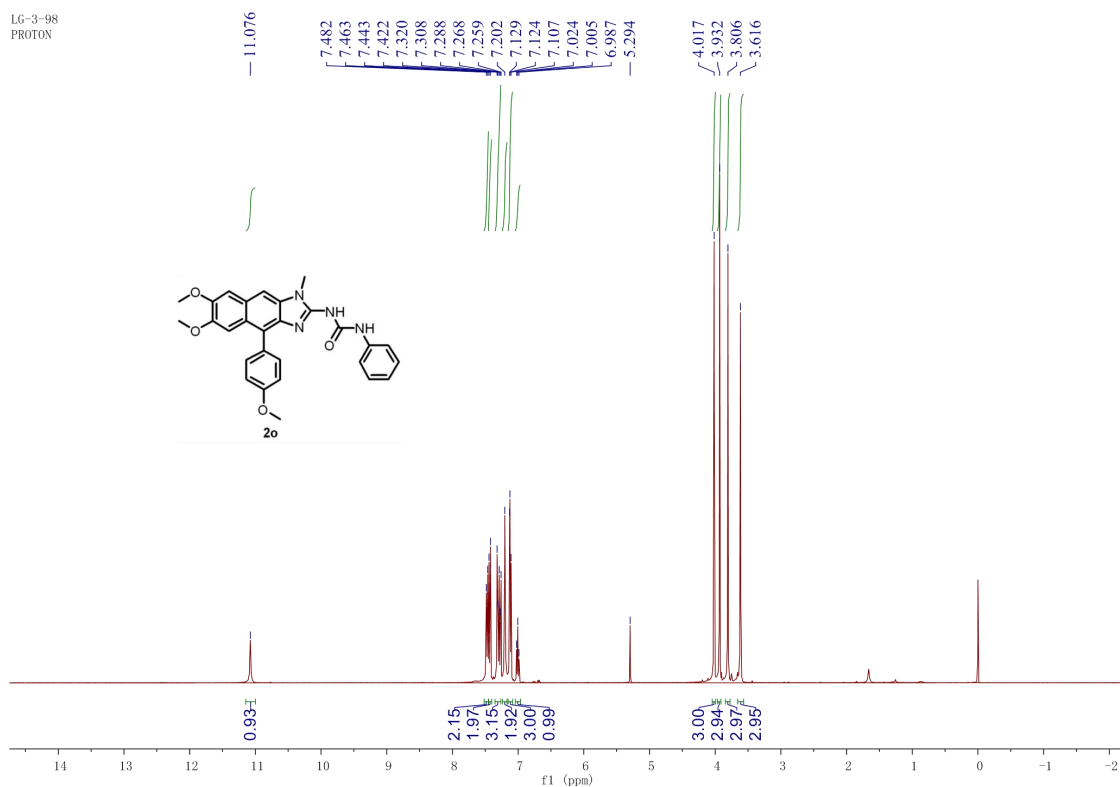

LG-3-98  
C13CPD

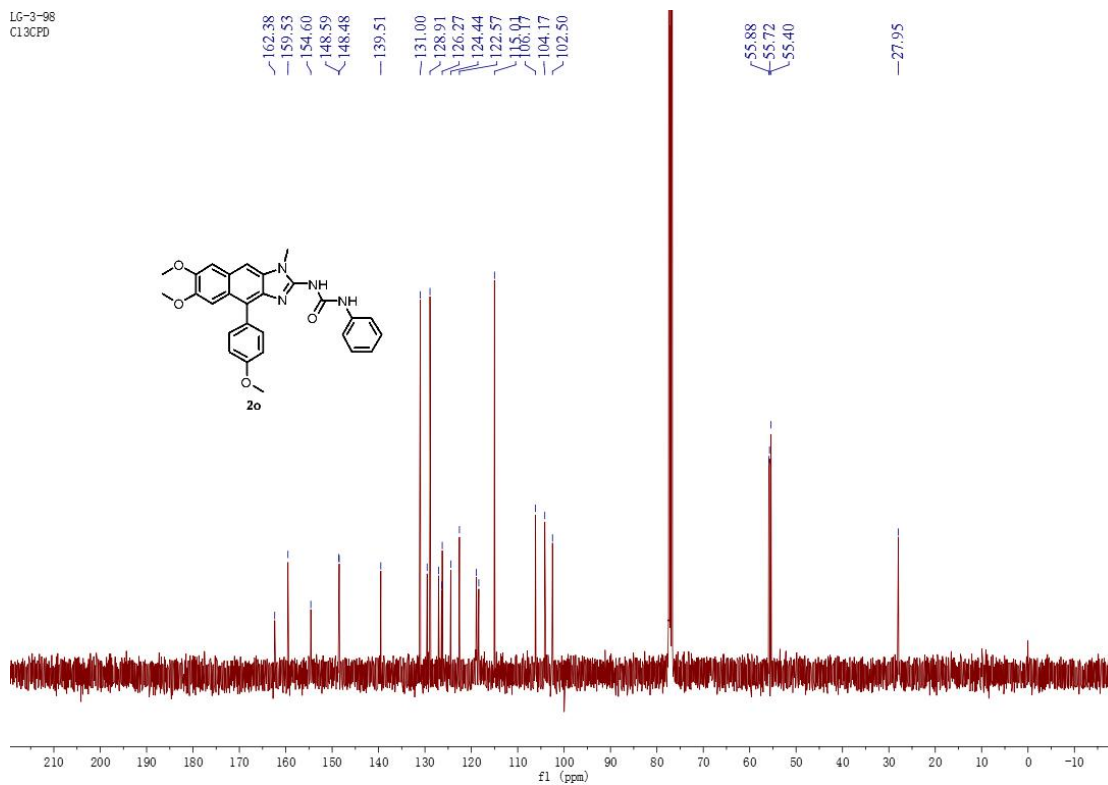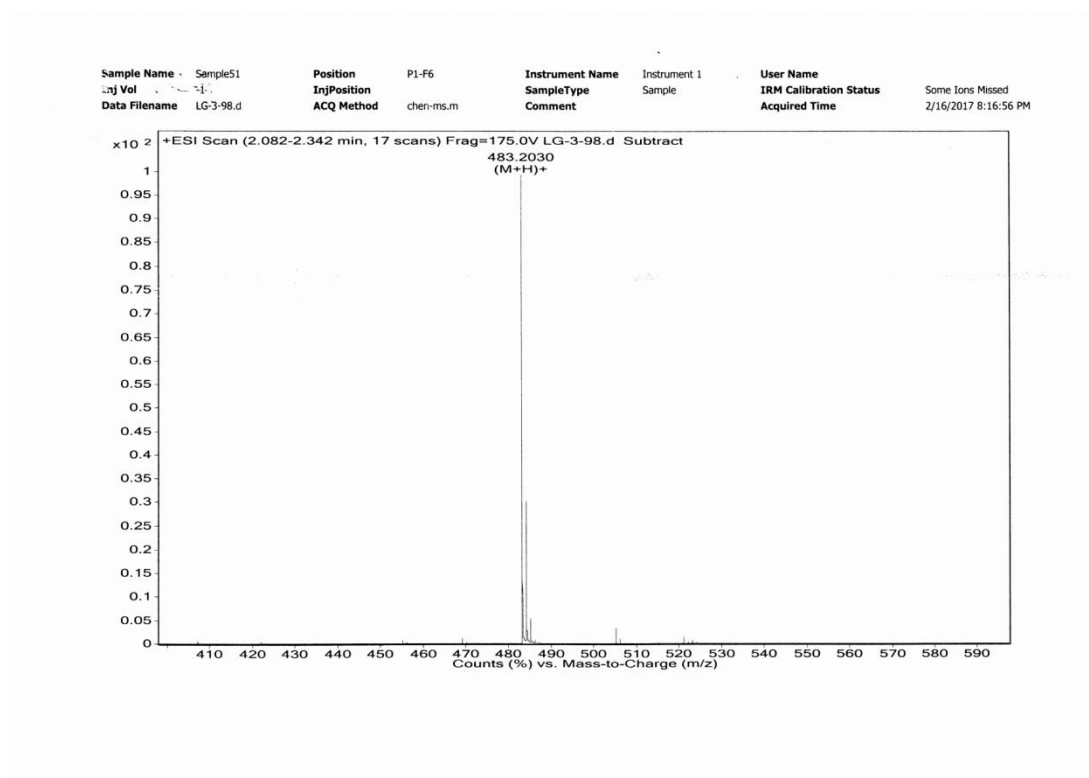

LG-3-99-2-H  
PROTON

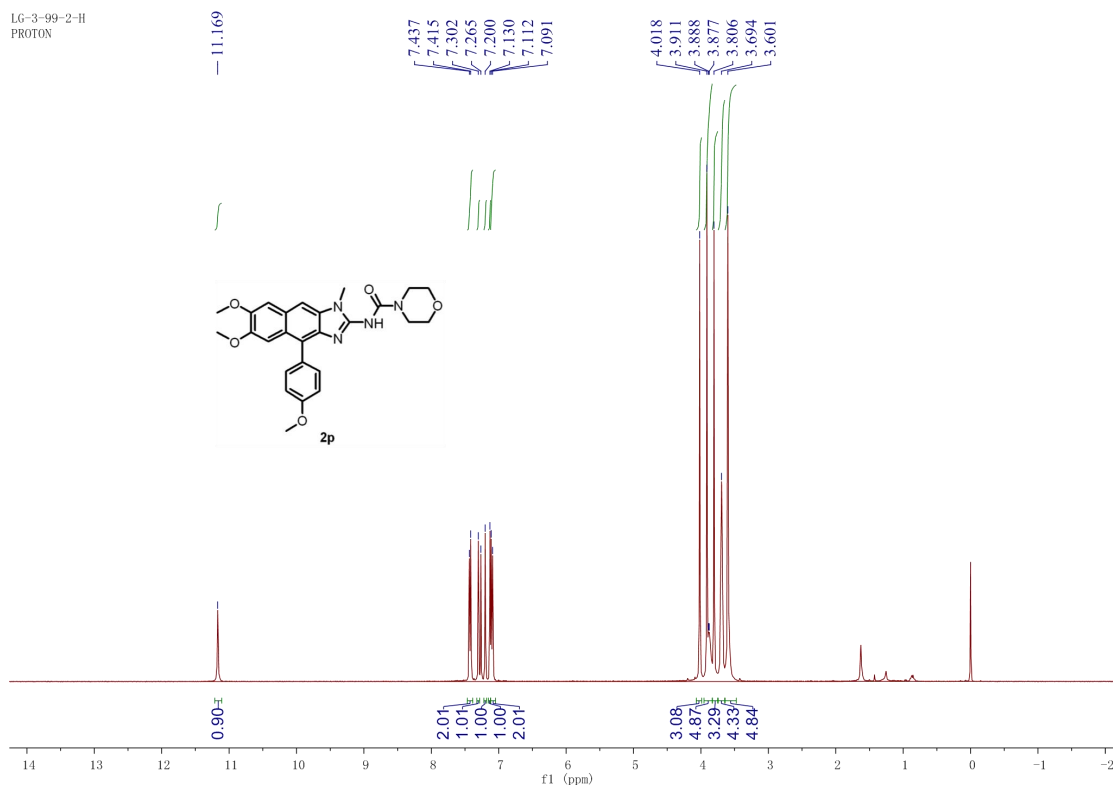

LG-3-99-2-c  
C13CPD

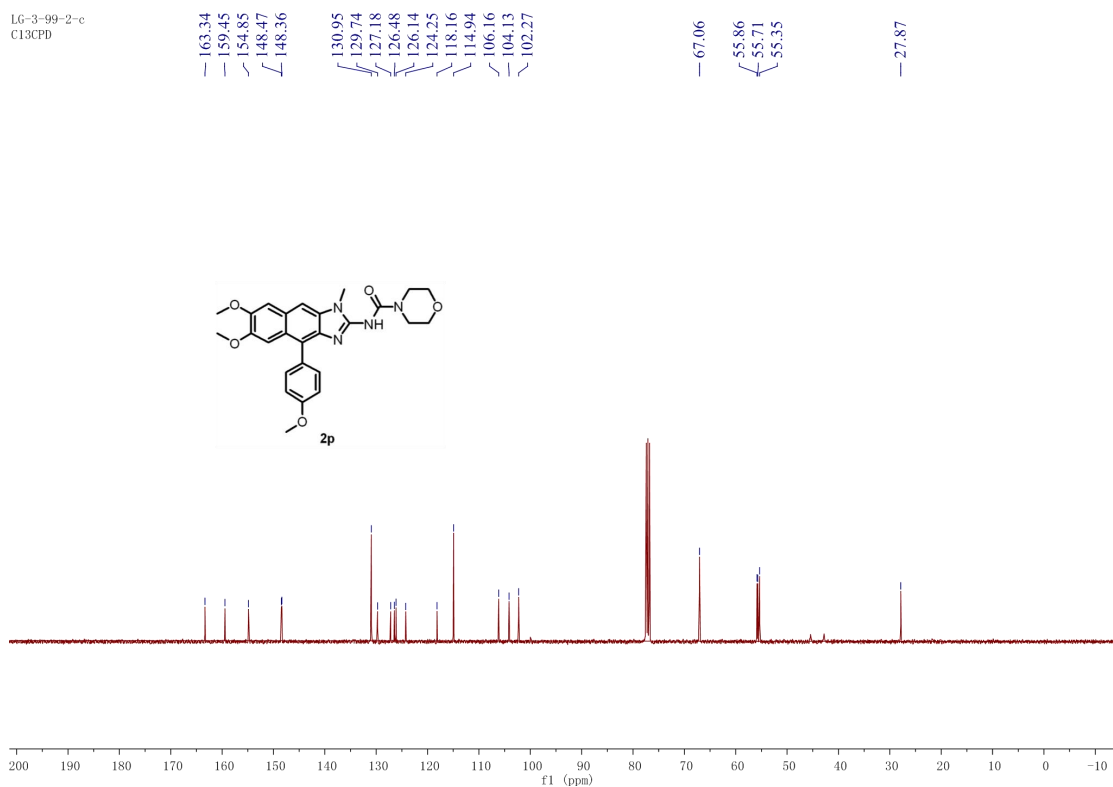

| Sample Name   | Sample4     | Position    | P2-A4     | Instrument Name | Instrument 1 | User Name              |
|---------------|-------------|-------------|-----------|-----------------|--------------|------------------------|
| Inj Vol       | -1          | InjPosition |           | SampleType      | Sample       | IRM Calibration Status |
| Data Filename | LG-3-99-2.d | ACQ Method  | chen-ms.m | Comment         |              | Acquired Time          |

Some Ions Missed  
2/16/2017 8:56:43 PM

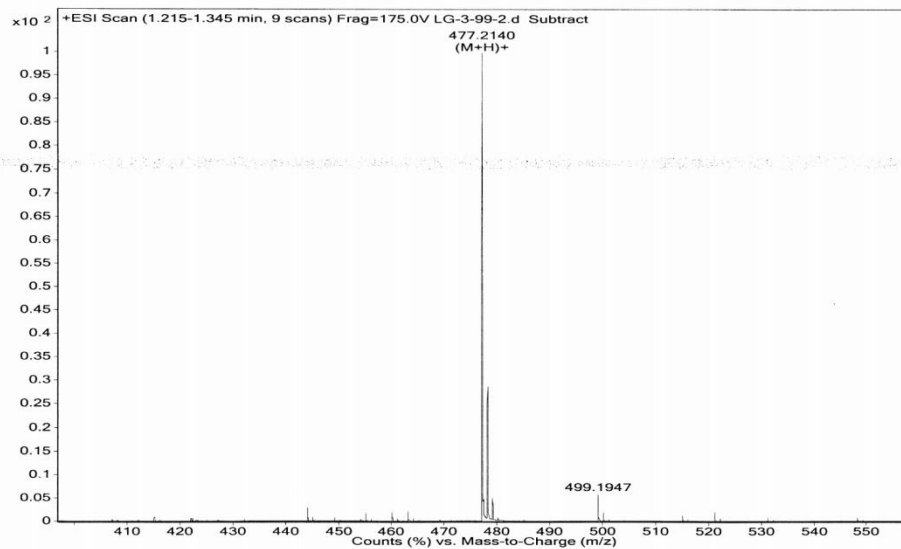

LG-3-102-H

11.099

7.425, 7.406, 7.263, 7.196, 7.102, 7.083

5.153, 5.134

4.016, 3.915, 3.798, 3.606, 3.566

1.961, 1.936, 1.735, 1.702, 1.577, 1.377, 1.347, 1.173, 1.146

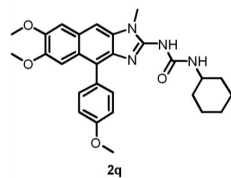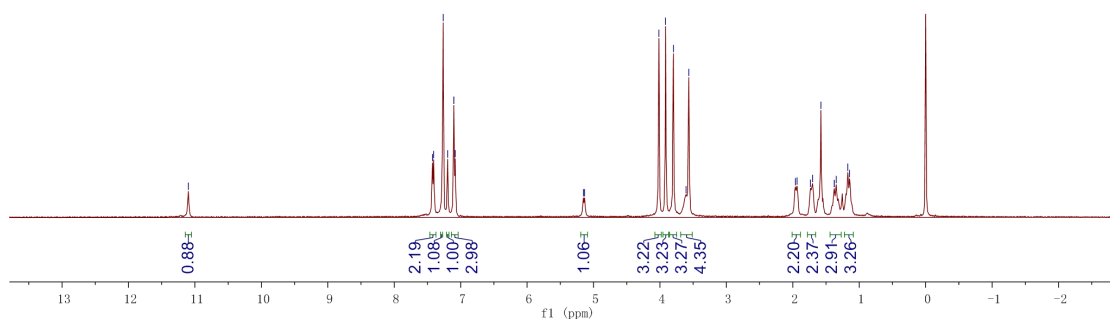

LG-3-102-C  
C13CPD

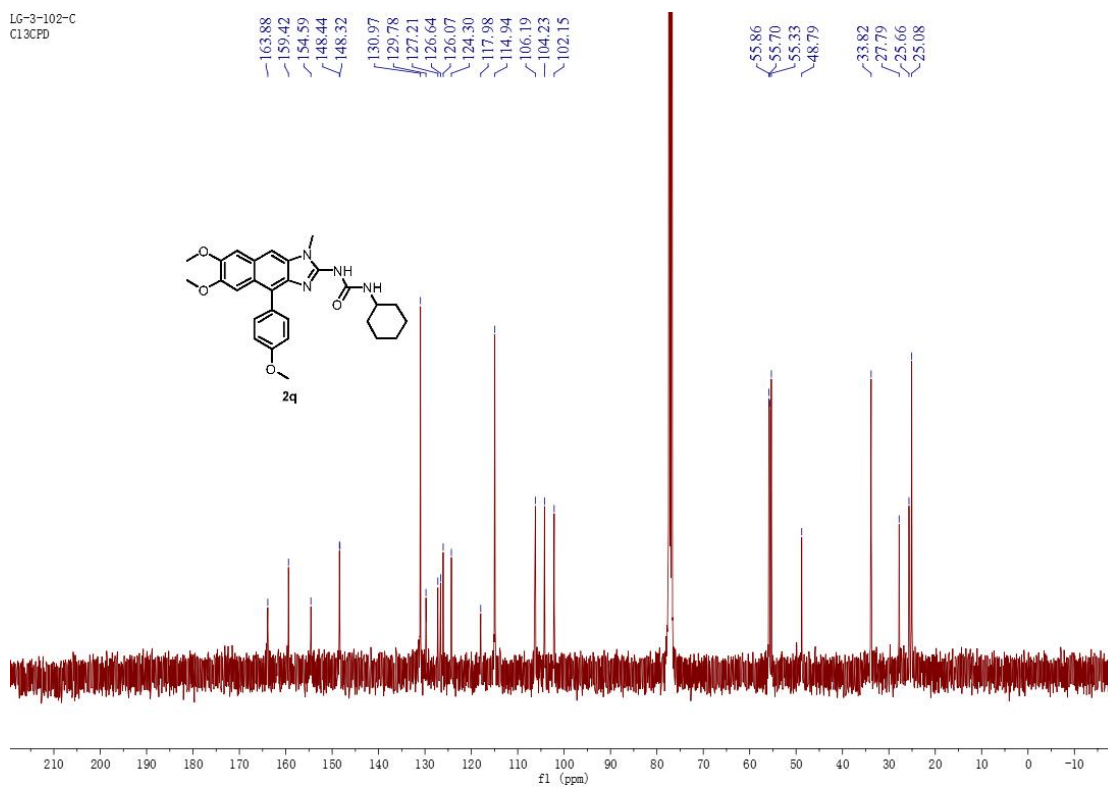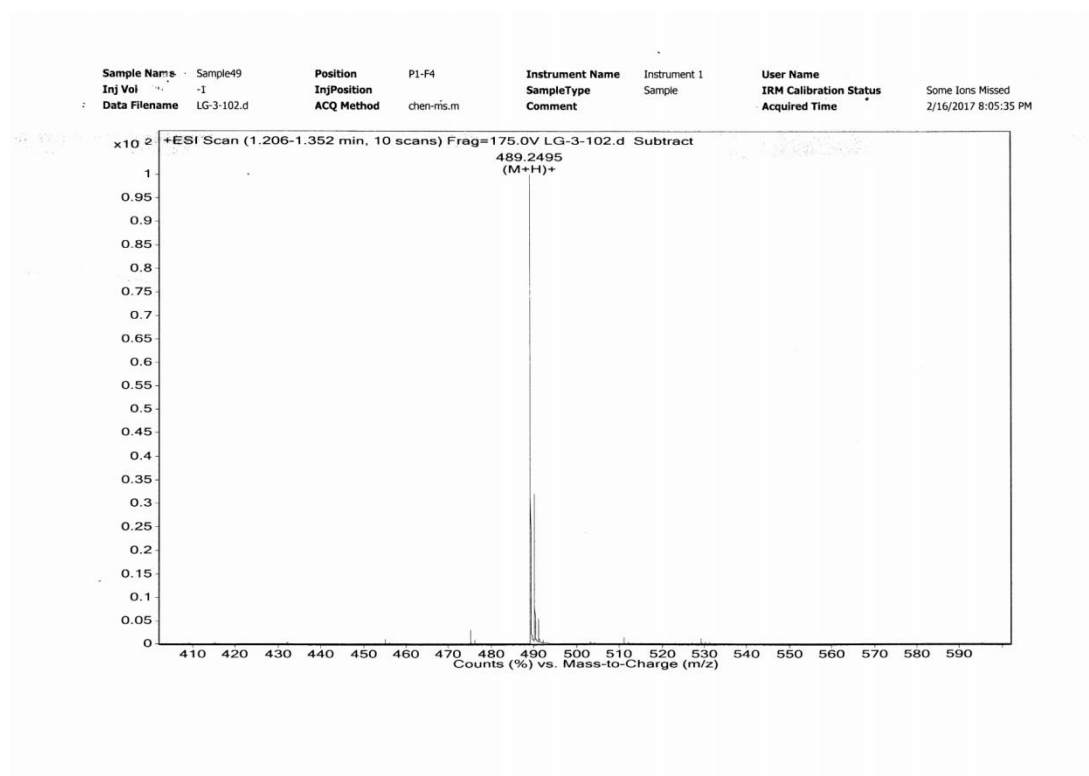



LG-3-103-H  
PROTON

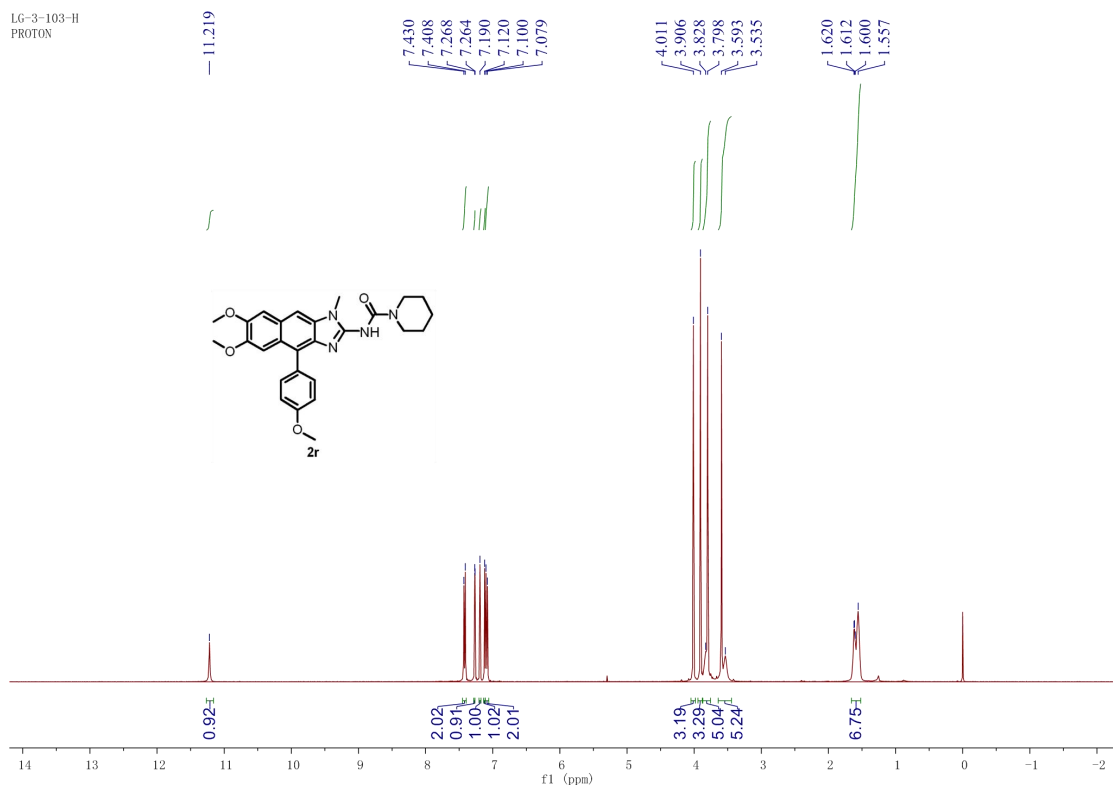

LG-3-103-C  
C13CPD

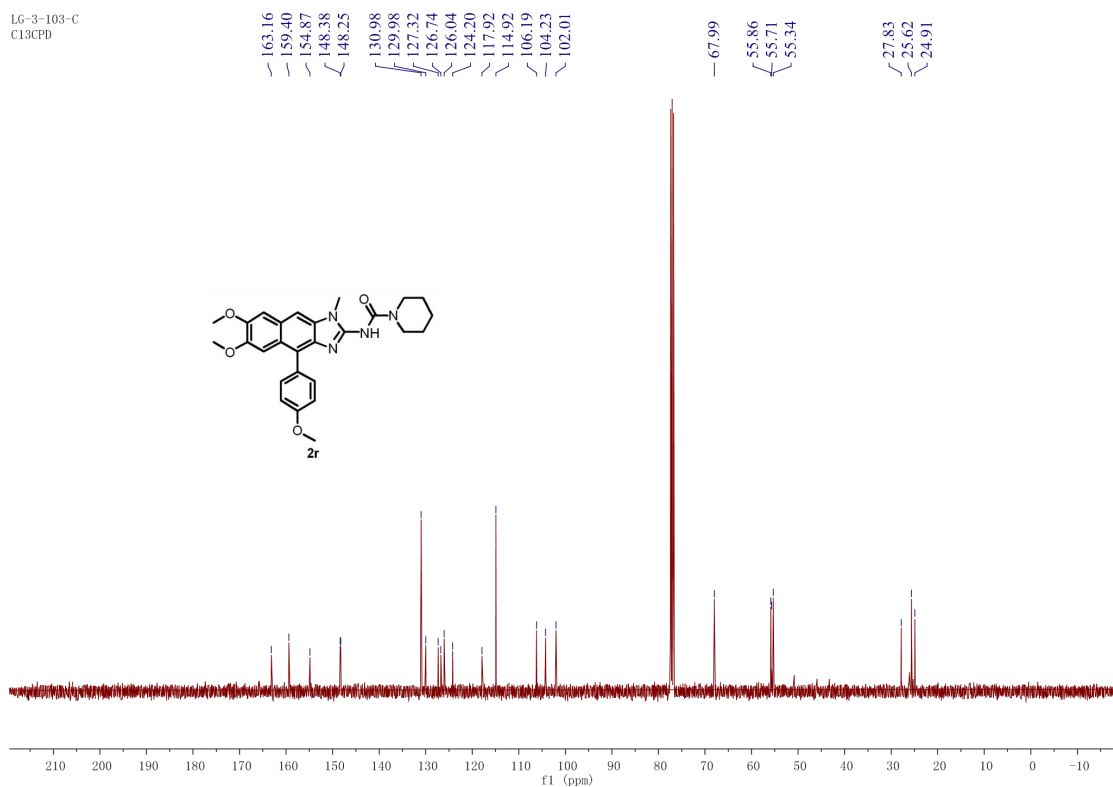

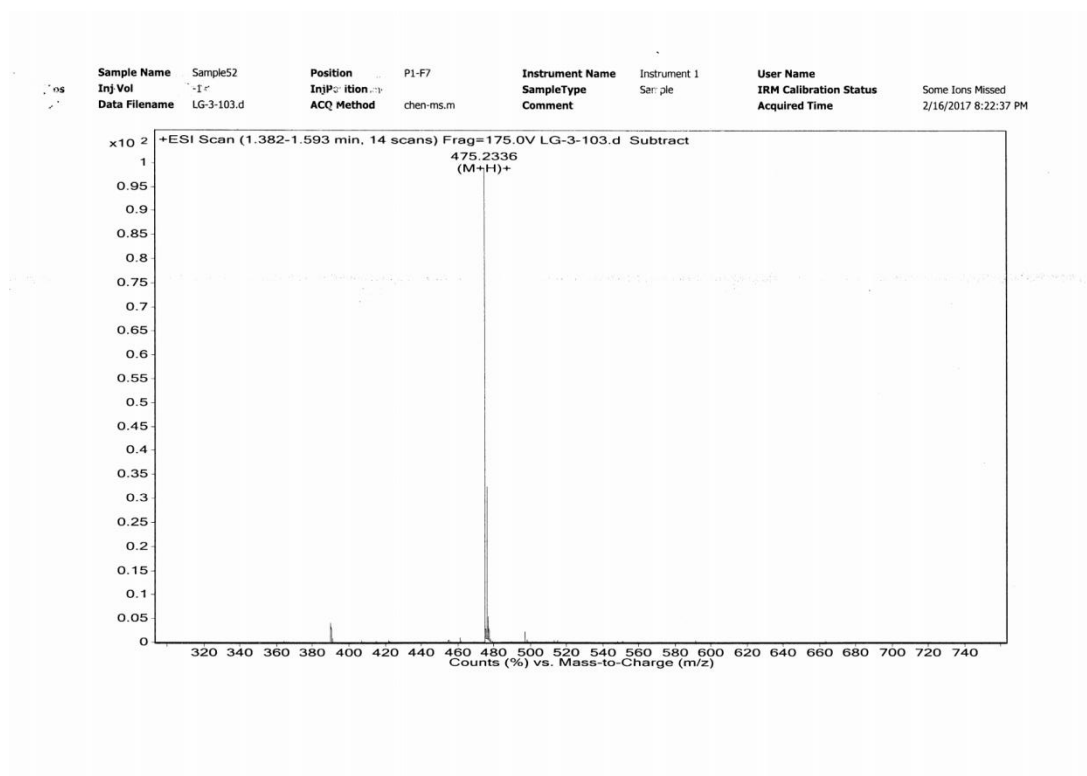

LG-3-104-C  
PROTON

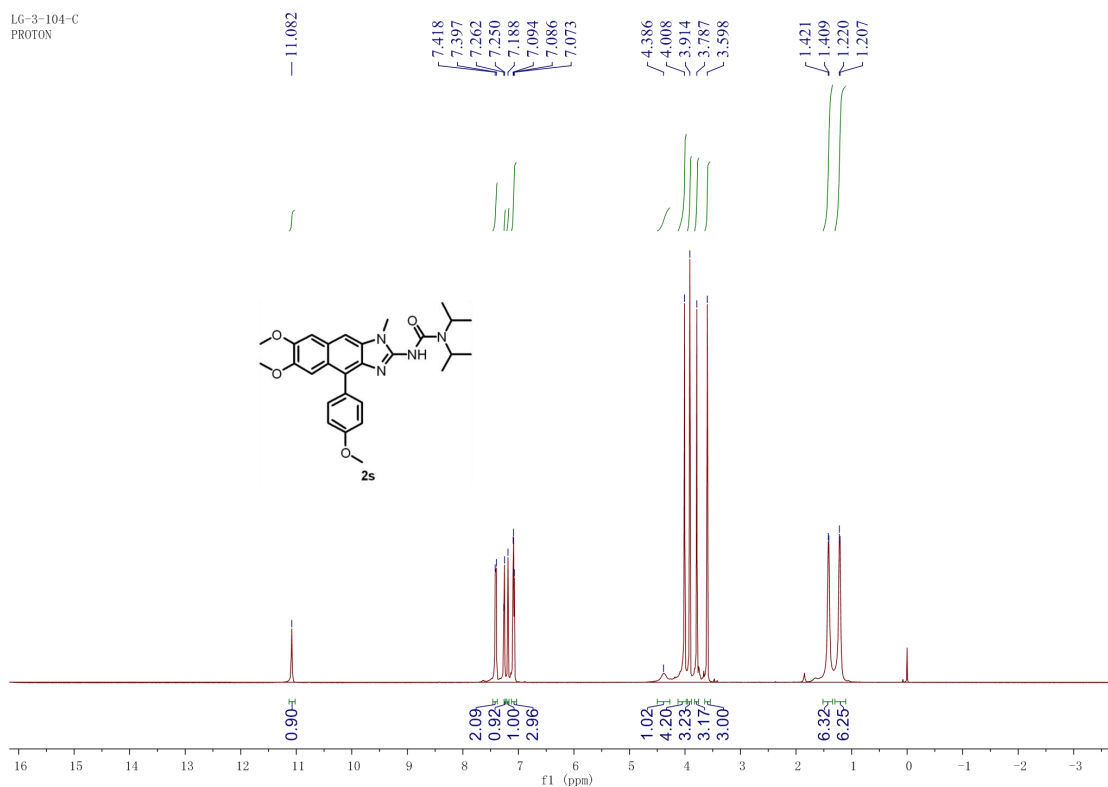

LG-3-104-C  
C13CPD

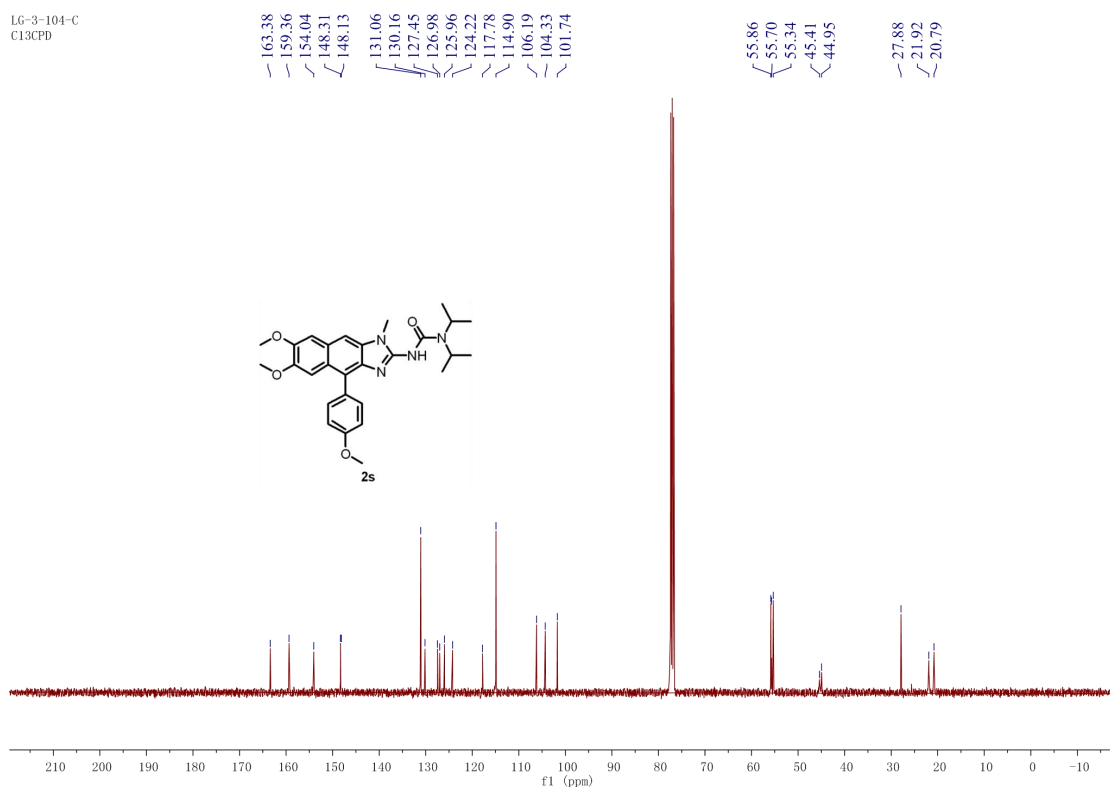

| Sample Name   | Sample7    | Position    | P2-A7     | Instrument Name | Instrument 1 | User Name              |
|---------------|------------|-------------|-----------|-----------------|--------------|------------------------|
| Inj Vol       | -1         | InjPosition |           | SampleType      | Sample       | IRM Calibration Status |
| Data Filename | LG-3-104.d | ACQ Method  | chen-ms.m | Comment         |              | Acquired Time          |

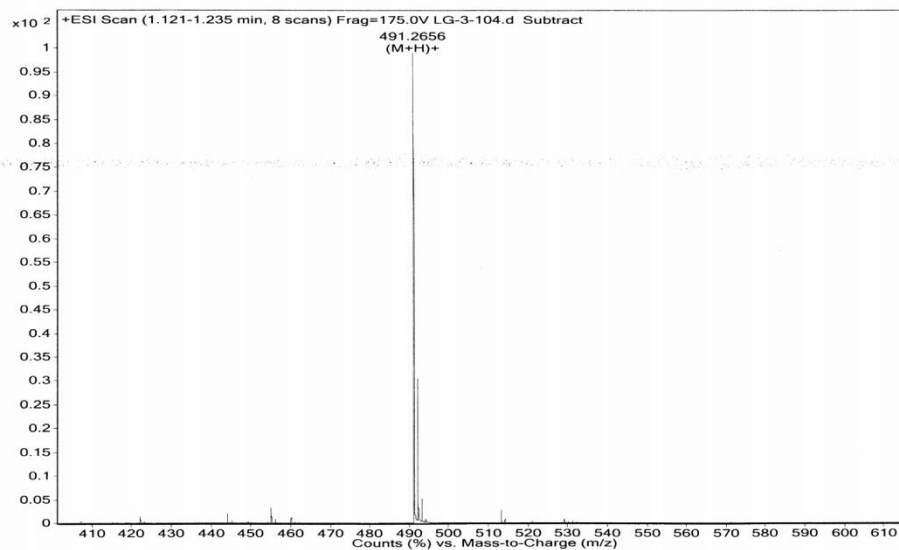

LG-3-98-2  
PROTON

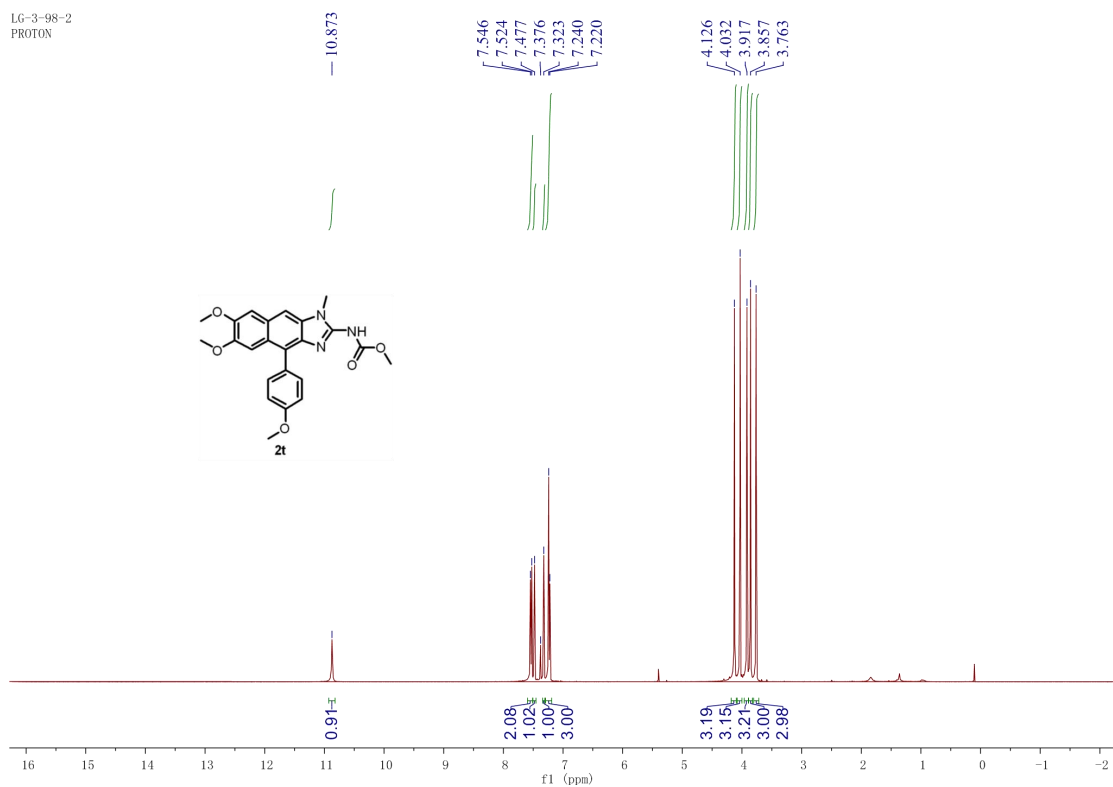

LG-3-97-1  
C13CPD

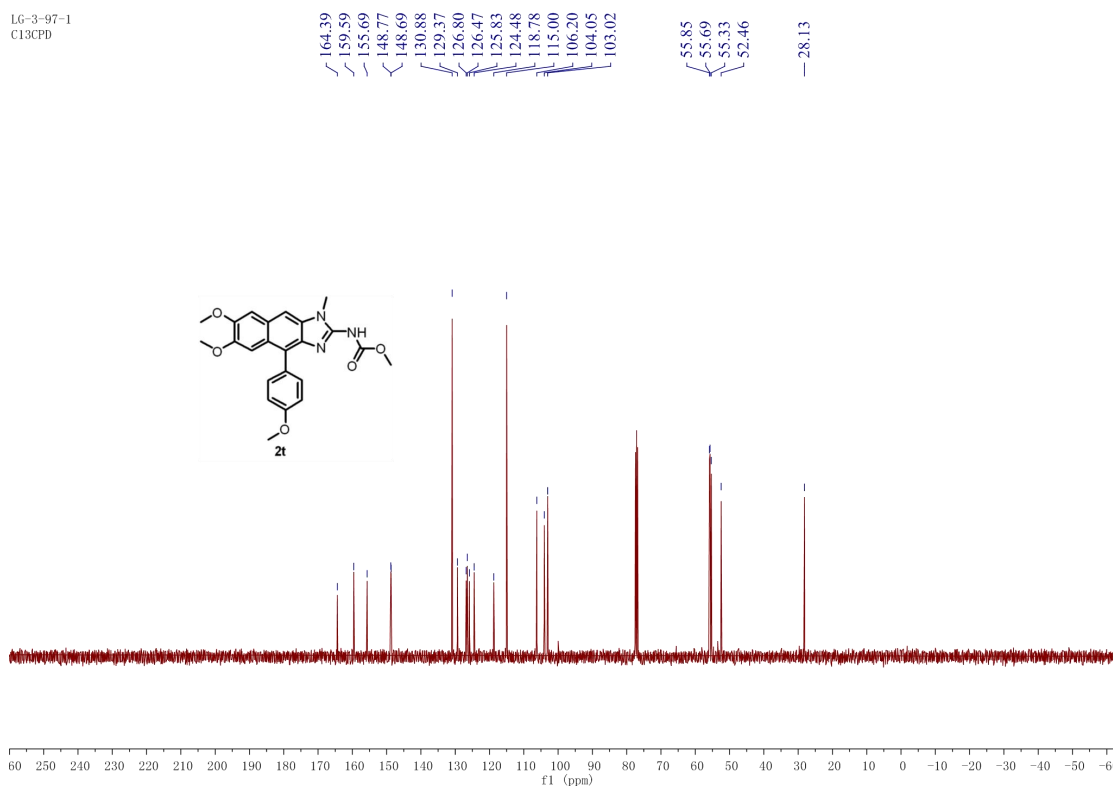

| Sample Name   | Sample11    | Position    | P1-B2     | Instrument Name | Instrument 1 | User Name              |
|---------------|-------------|-------------|-----------|-----------------|--------------|------------------------|
| Inj Vol       | -1          | InjPosition |           | SampleType      | Sample       | IRM Calibration Status |
| Data Filename | LG-3-97-1.d | ACQ Method  | chen-ms.m | Comment         |              | Acquired Time          |

Some Ions Missed  
1/5/2017 10:04:58 AM

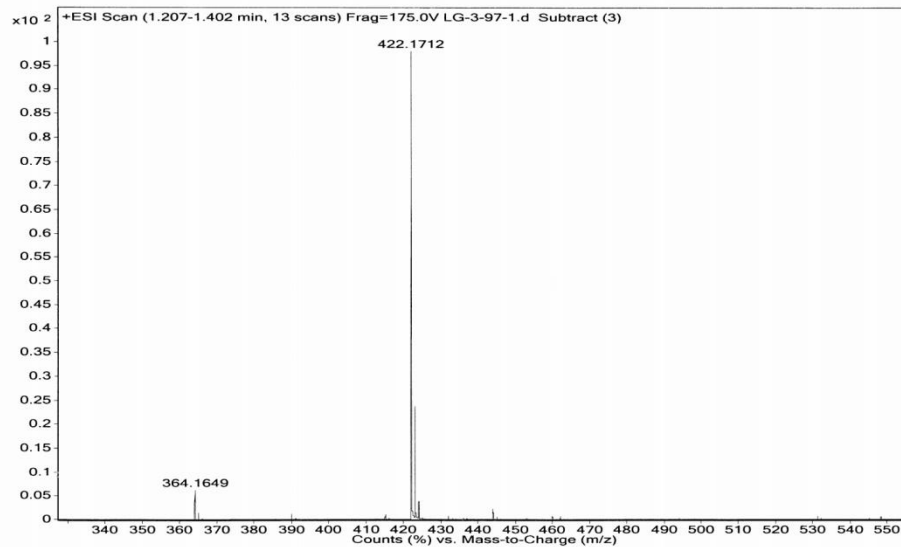

LG-3-105-H

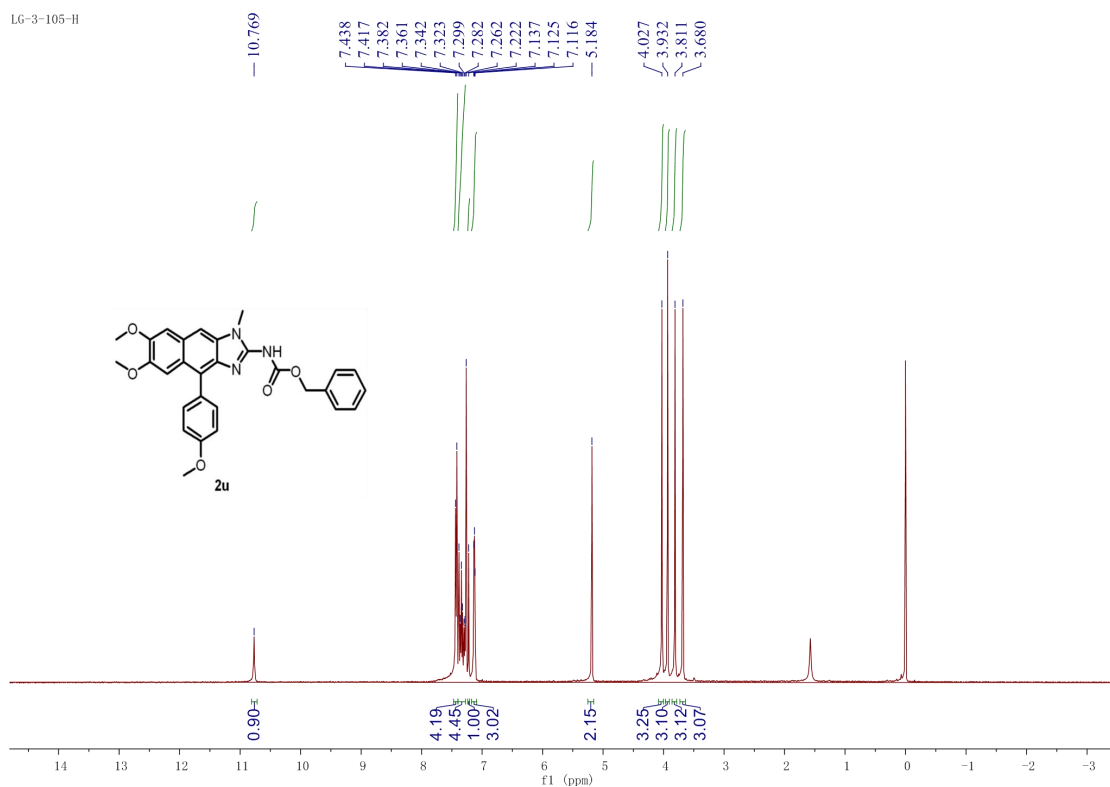

LG-3-105-C  
C13CPD

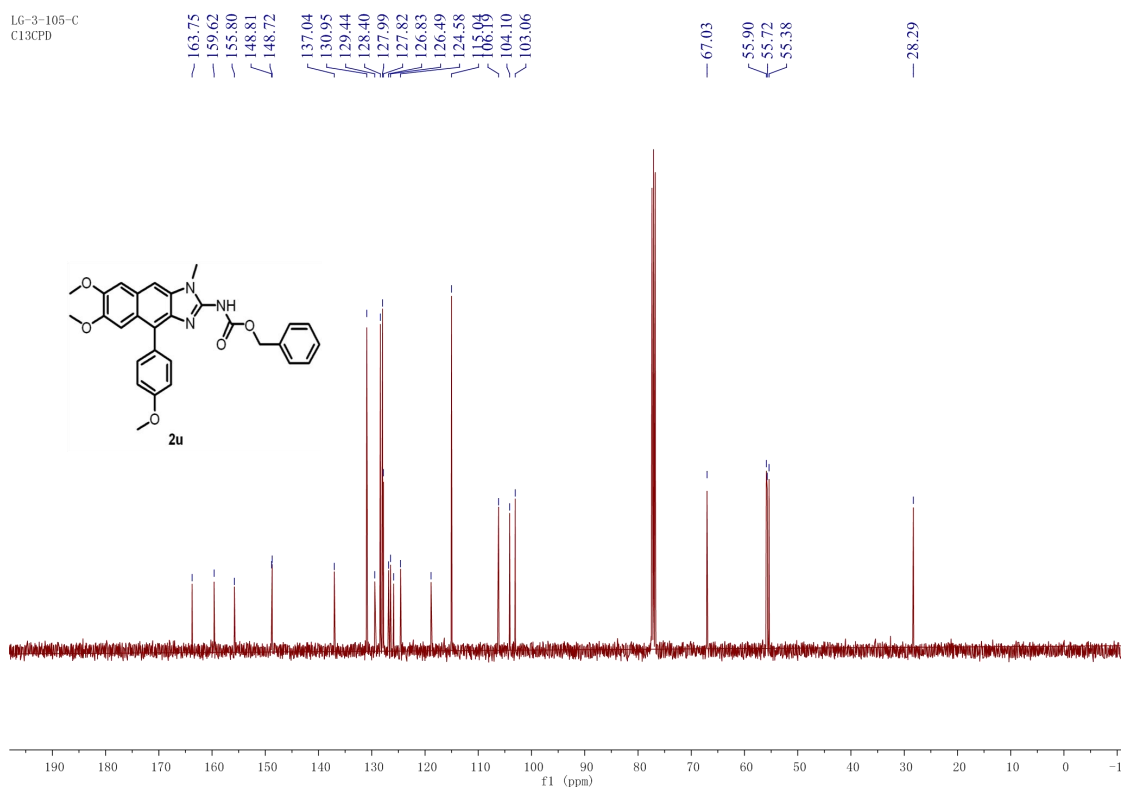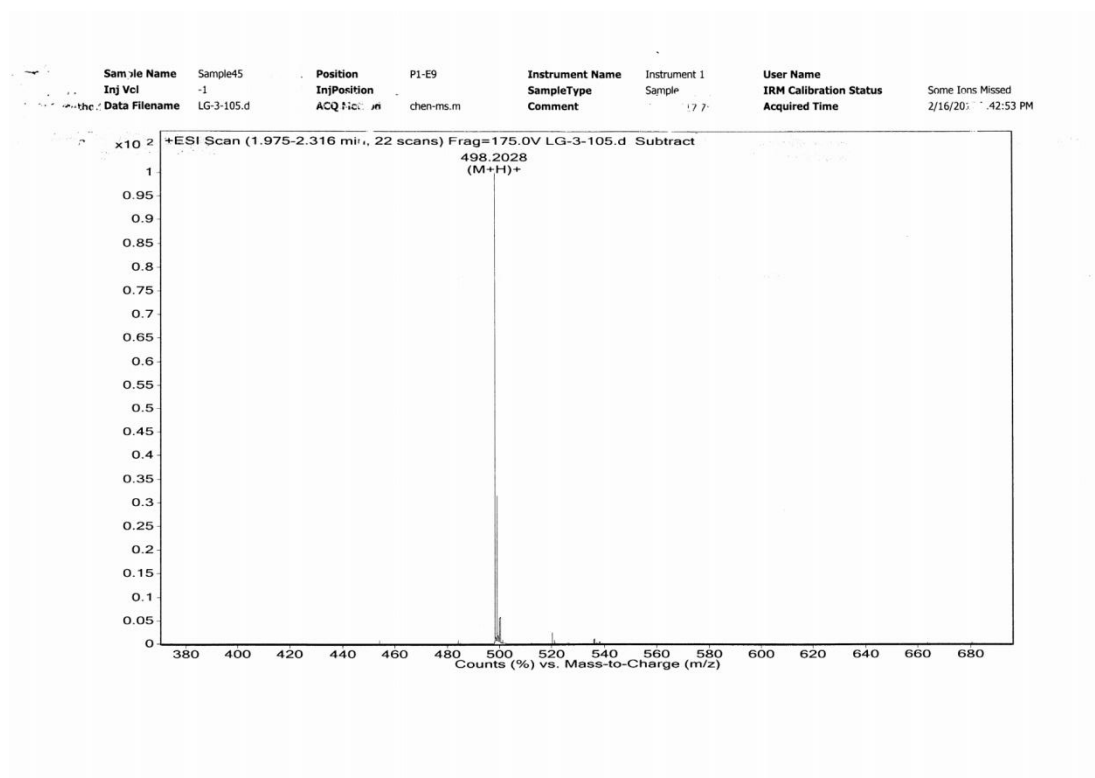

LG-3-5-H  
PROTON

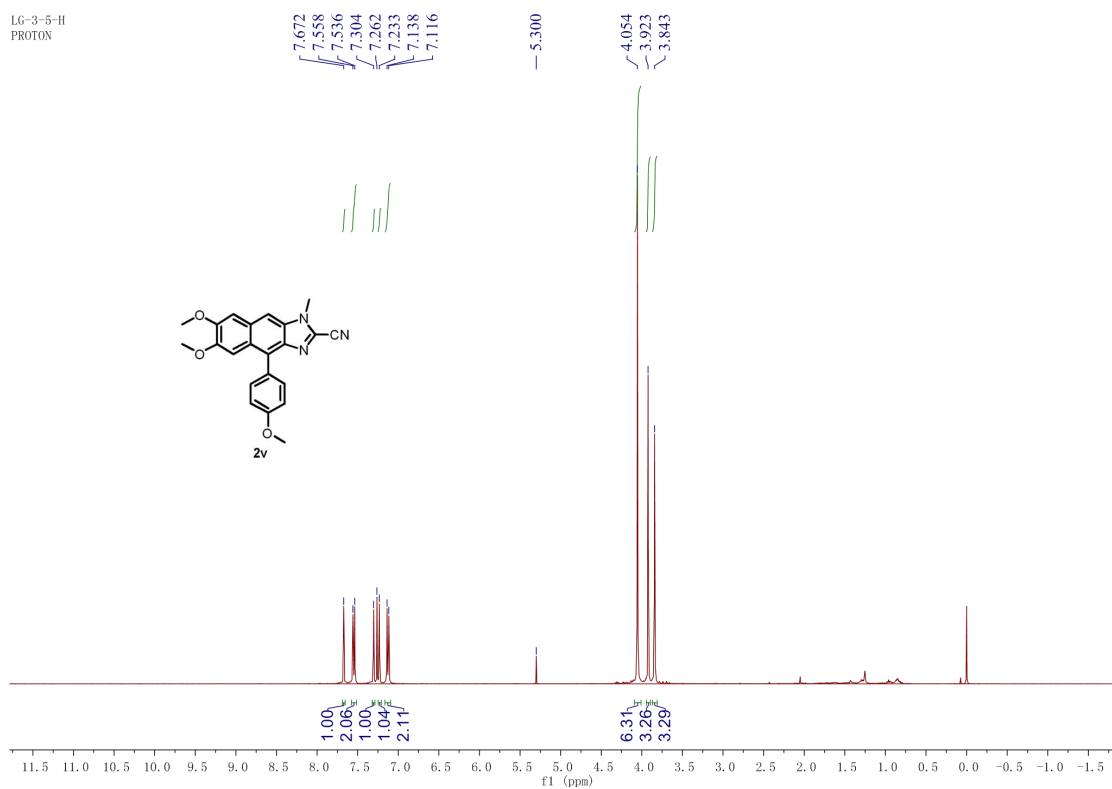

LG-3-5  
C13CPD

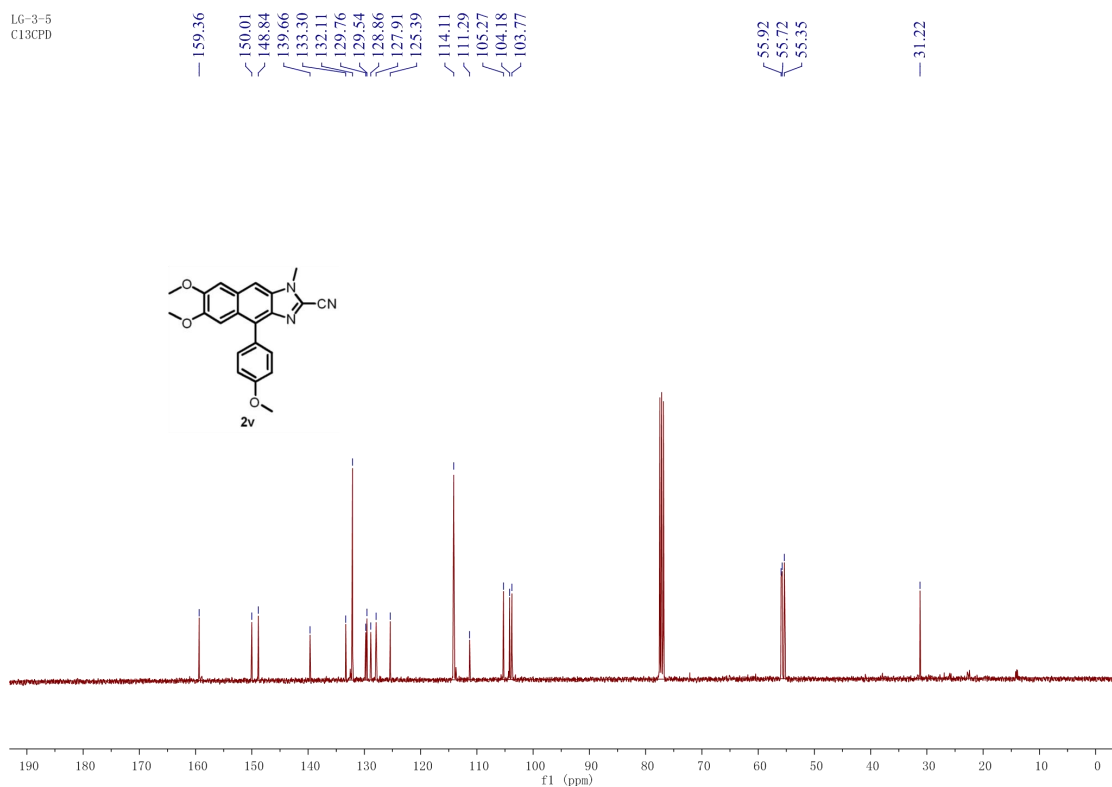

| Sample Name   | Sample14 | Position    | PI-85     | Instrument Name | Instrument 1 | User Name              |                       |
|---------------|----------|-------------|-----------|-----------------|--------------|------------------------|-----------------------|
| Inj Vol       | -1       | InjPosition |           | SampleType      | Sample       | IRM Calibration Status | Some Ions Missed      |
| Data Filename | LG-3-5.d | ACQ Method  | chen-ms.m | Comment         |              | Acquired Time          | 11/16/2016 6:00:11 PM |

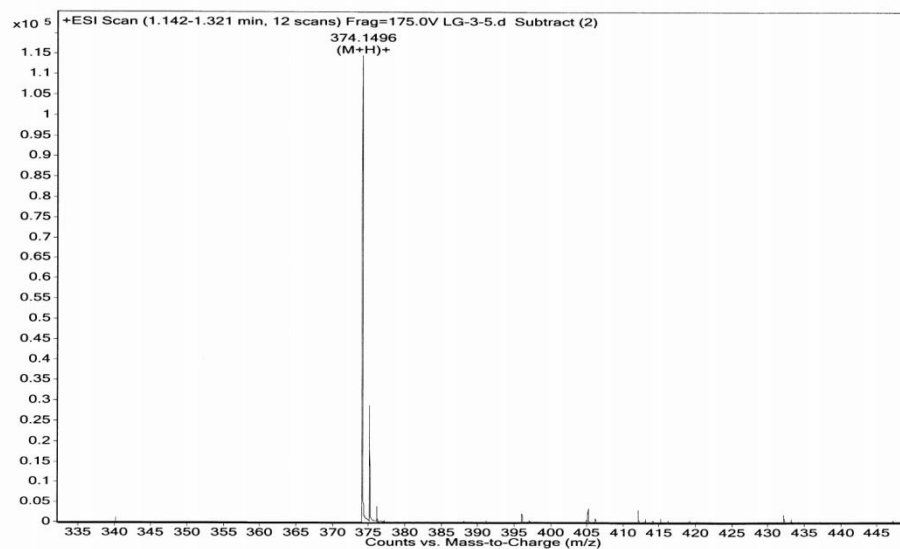

LG-3-27-H  
PROTON

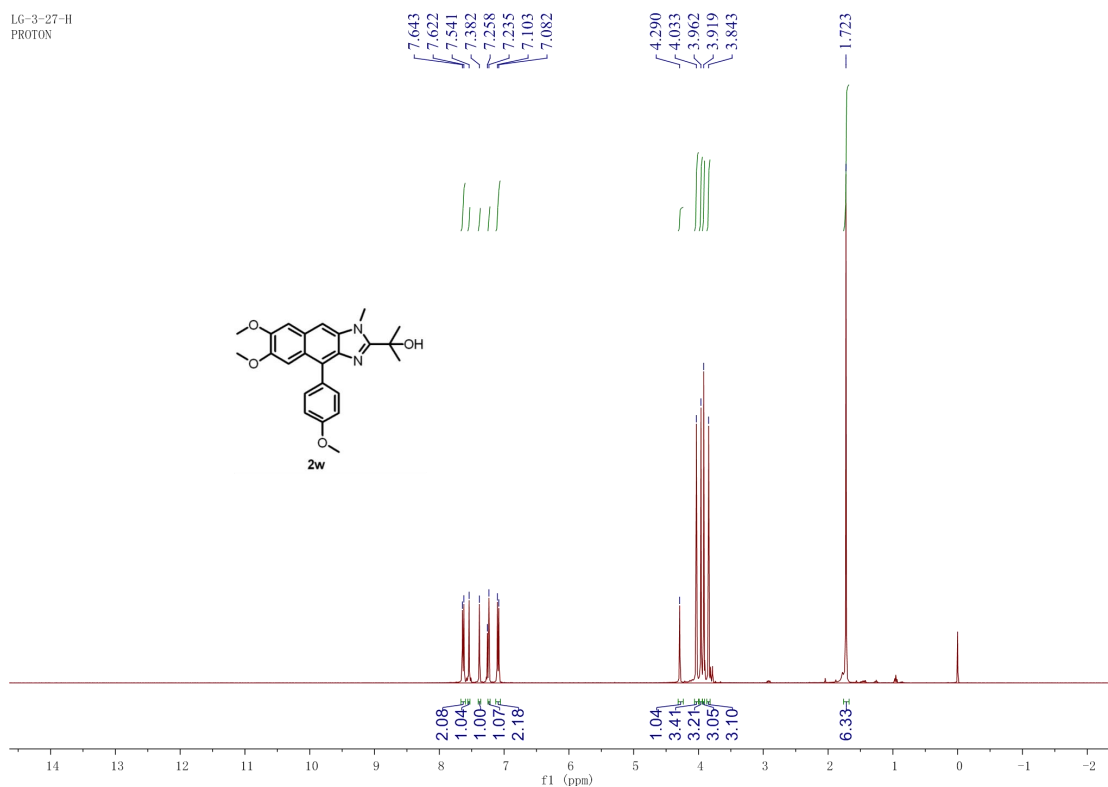



LG-3-27-H  
C13CPD

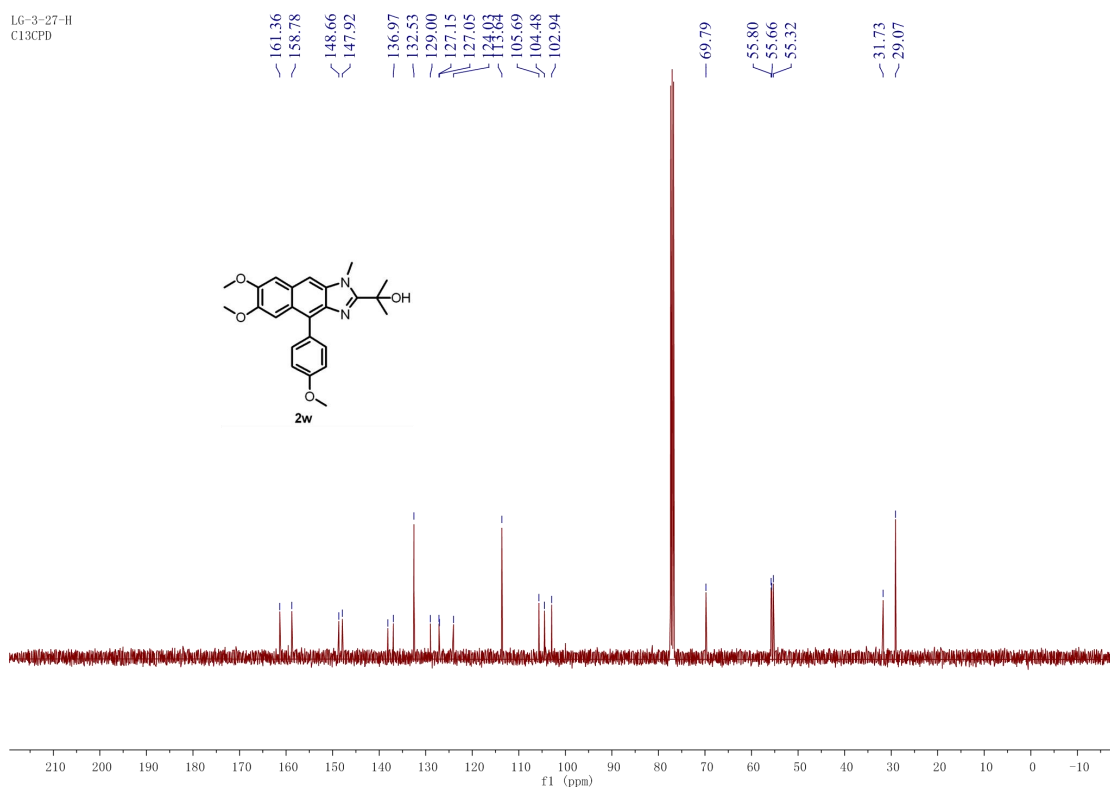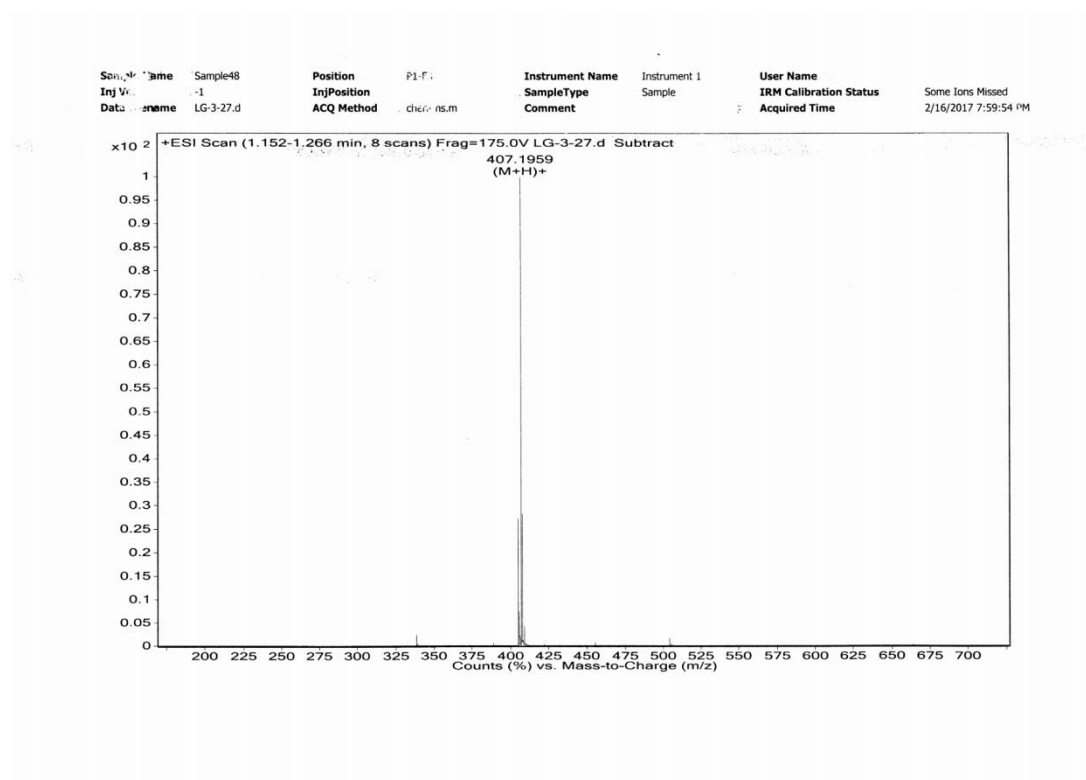

LG-3-6-H  
PROTON

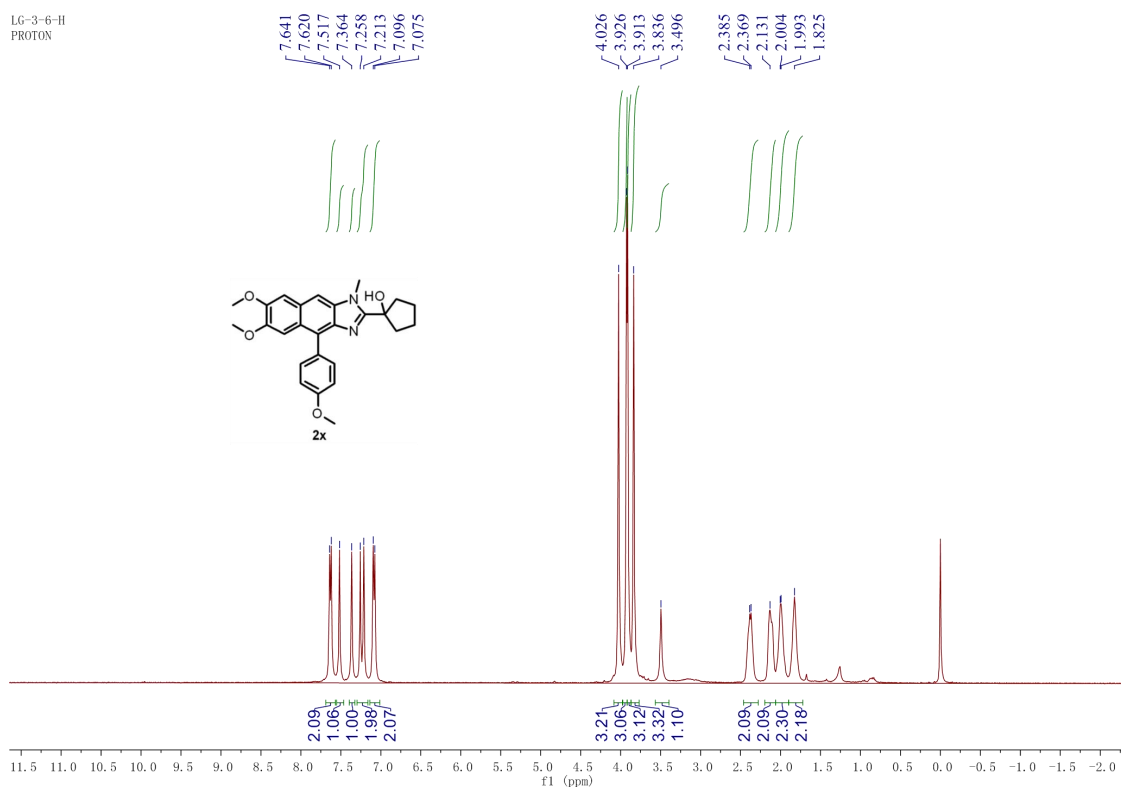

LG-3-6-1  
test

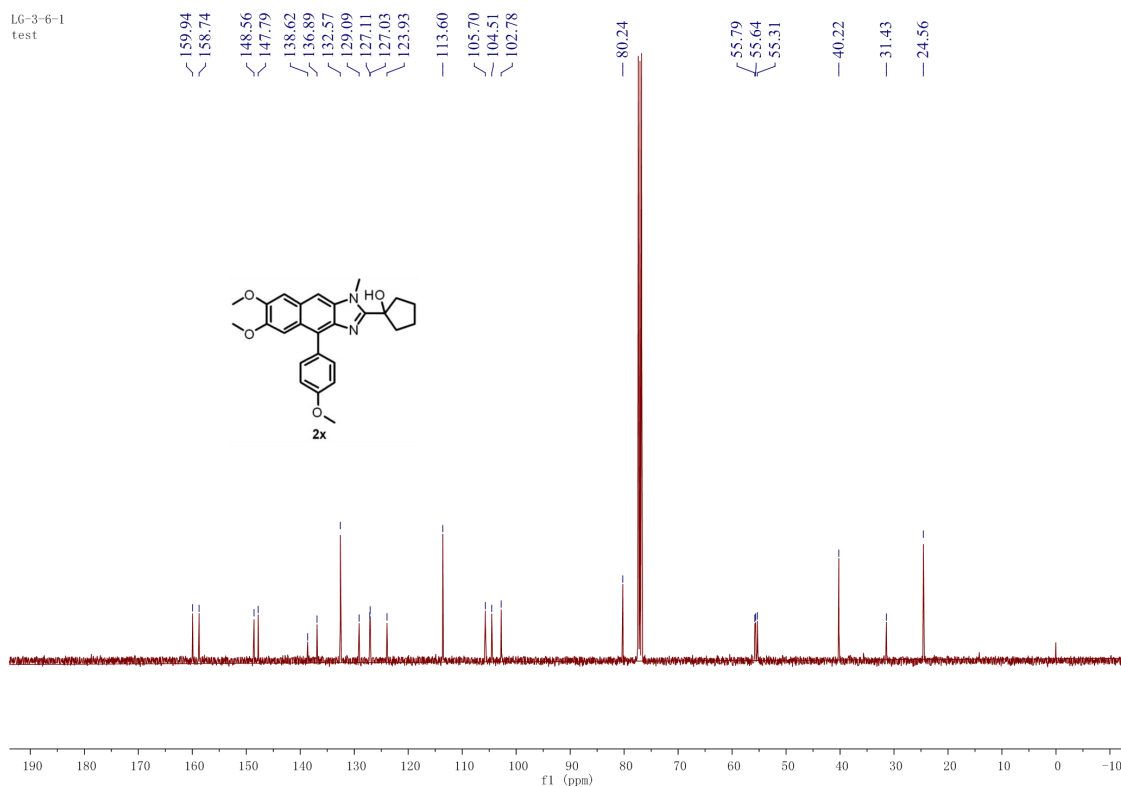

| Sample Name   | Sample15 | Position    | P1-B6     | Instrument Name | Instrument 1 | User Name              |                       |
|---------------|----------|-------------|-----------|-----------------|--------------|------------------------|-----------------------|
| Inj Vol       | -1       | InjPosition |           | SampleType      | Sample       | IRM Calibration Status | Some Ions Missed      |
| Data Filename | LG-3-6.d | ACQ Method  | chen-ms.m | Comment         |              | Acquired Time          | 11/16/2016 6:05:52 PM |

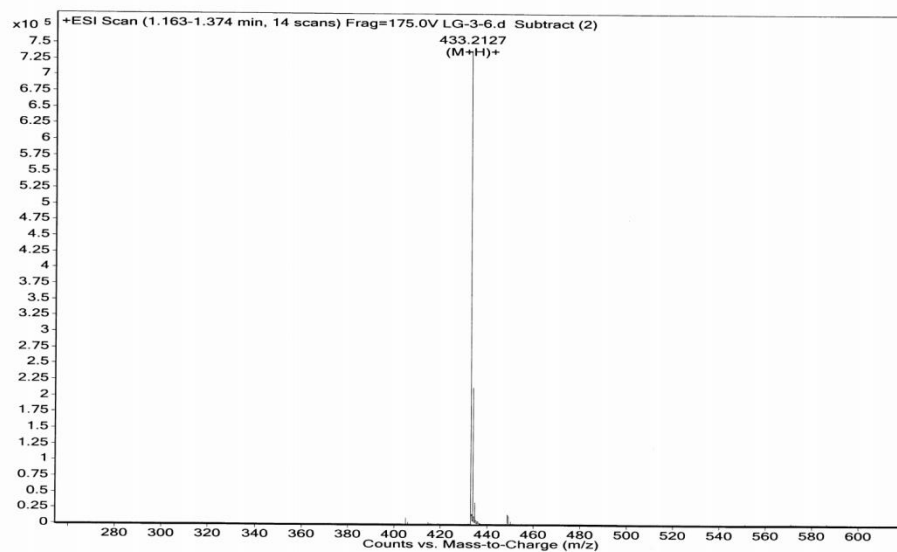

LG-3-20-H  
PROTON

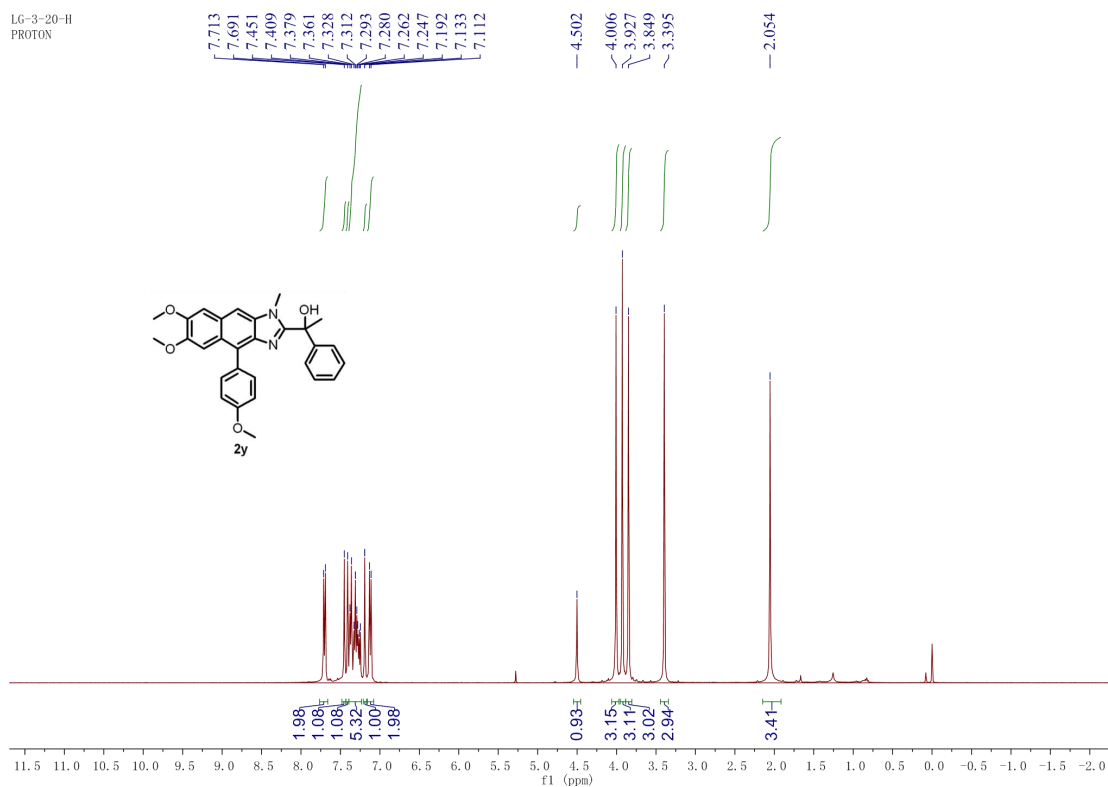

LG-3-20-H  
C13CPD

160.18  
158.84  
148.75  
147.96  
132.64  
128.55  
127.77  
127.19  
123.73  
105.66  
104.54  
102.95  
73.21  
55.80  
55.67  
55.33  
31.04  
29.00

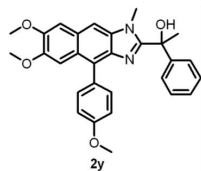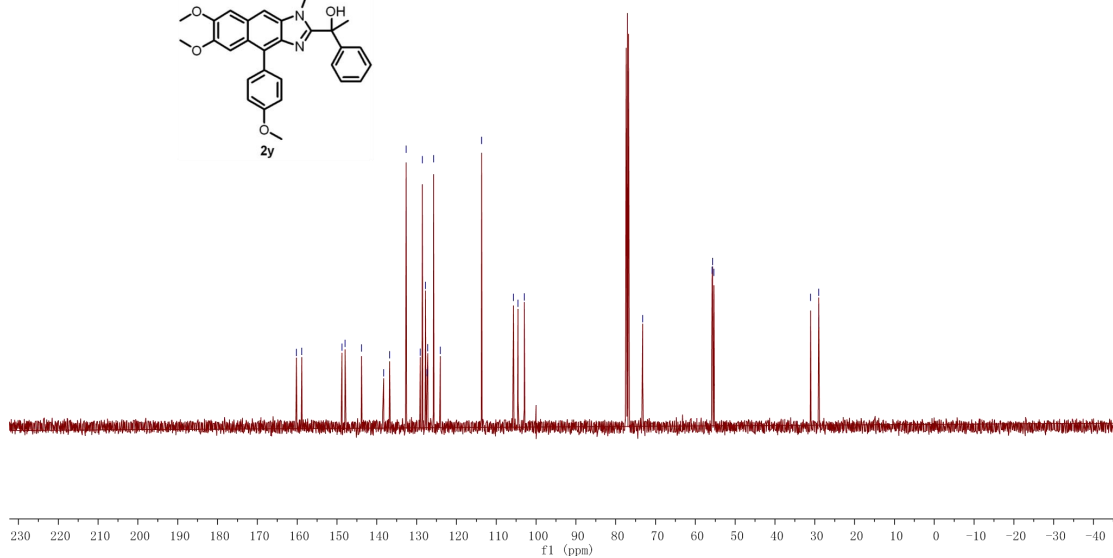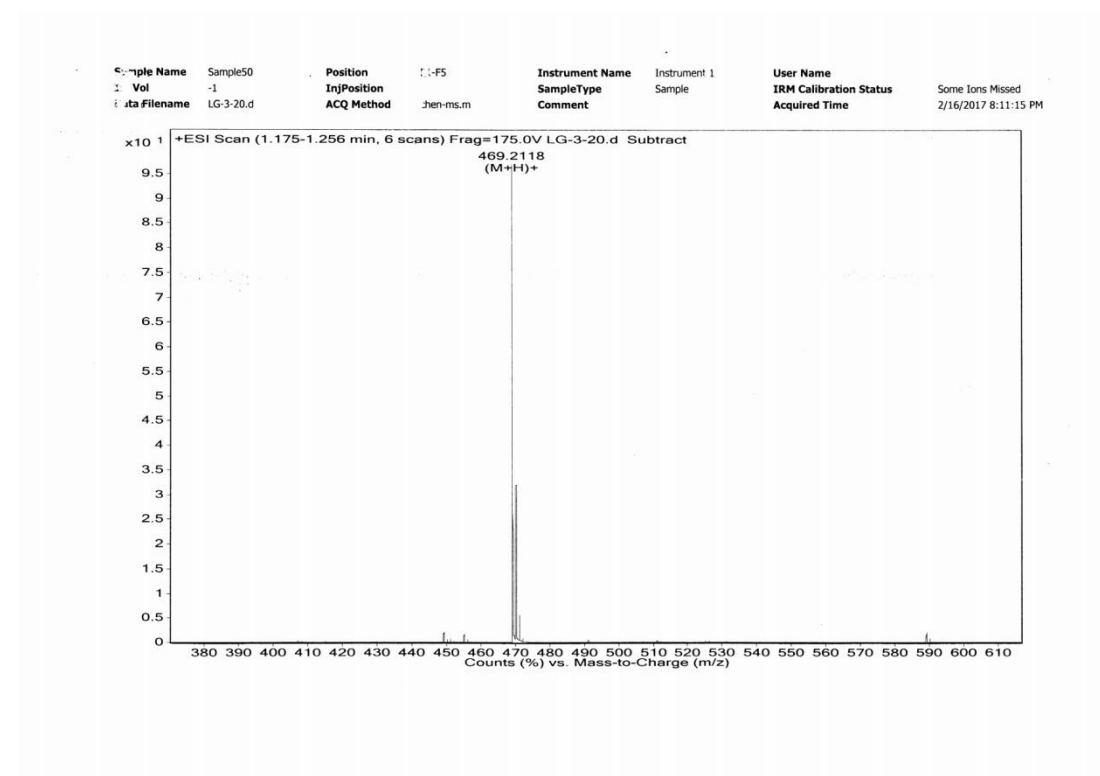

LG-3-49-C  
PROTON

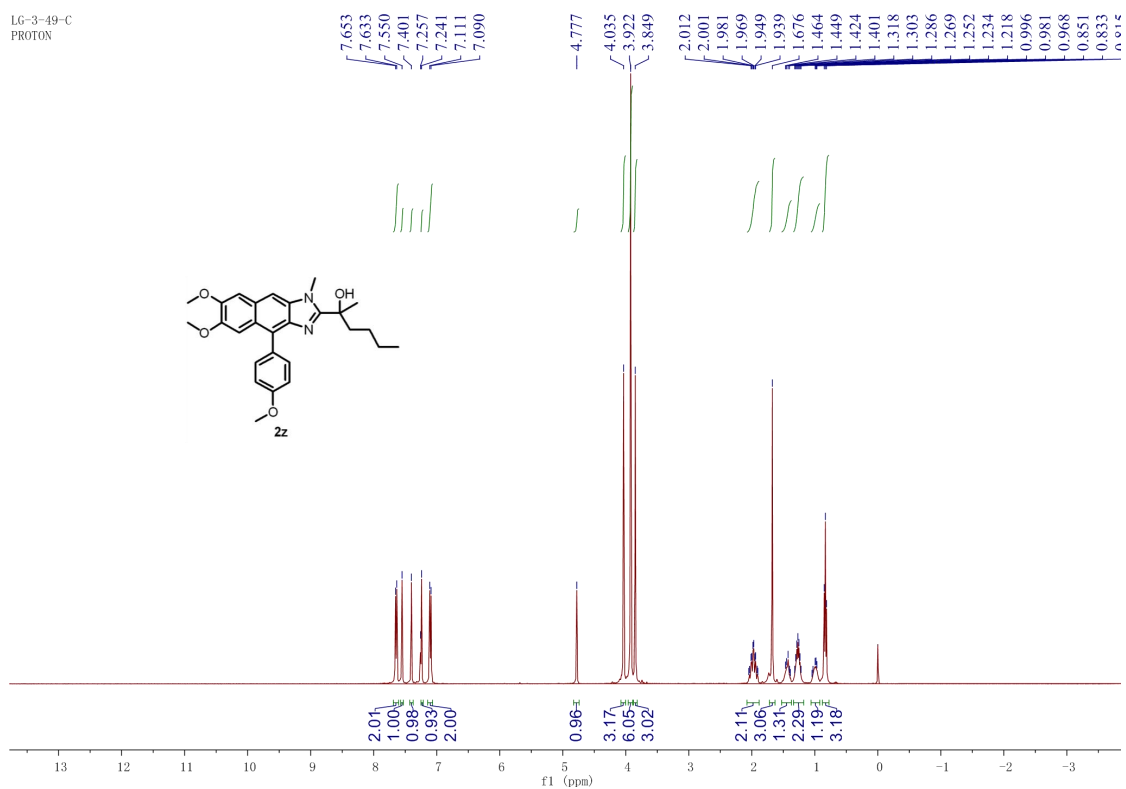

LG-3-49-C  
C13CPD

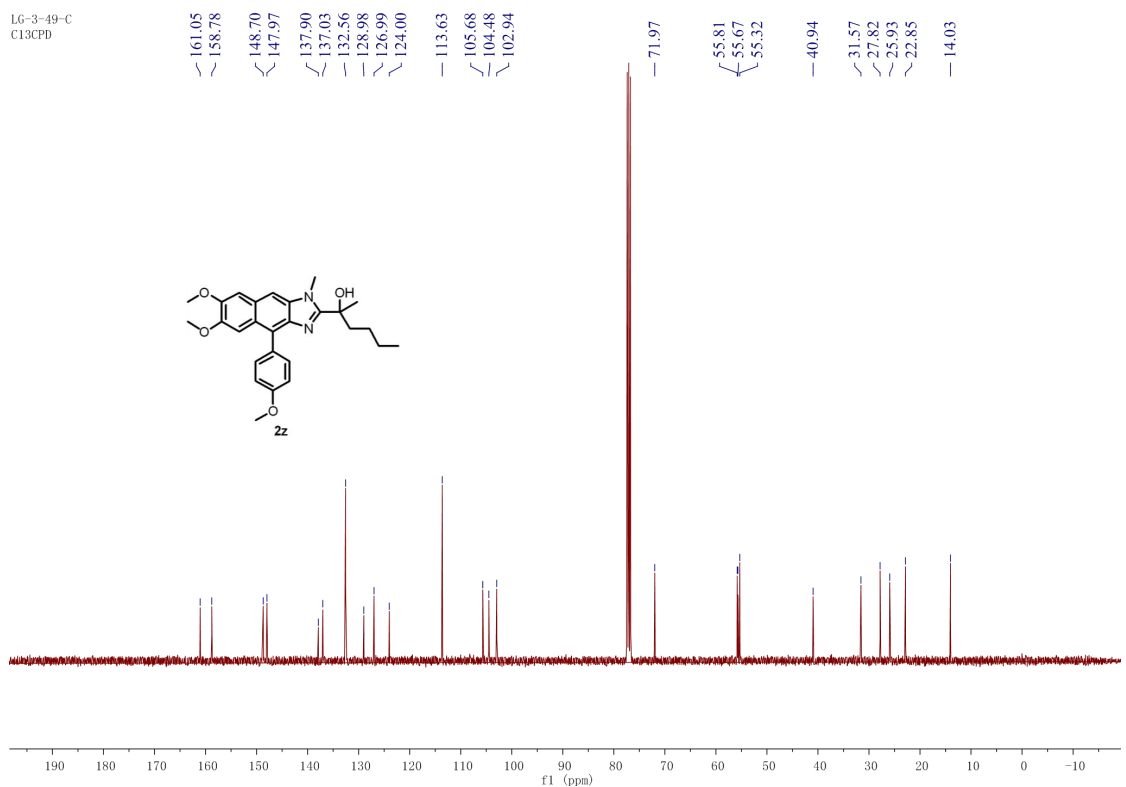

| Sample Name   | Position    | Instrument Name | User Name              |
|---------------|-------------|-----------------|------------------------|
| Sample54      | P1-F9       | Instrument 1    |                        |
| Inj Vol       | InjPosition | SampleType      | IRM Calibration Status |
| -1            |             |                 | 2/16/2017 8:33:58 PM   |
| Data Filename | ACQ Method  | Comment         | Acquired Time          |
| LG-3-49.d     | chen-ms.m   |                 |                        |

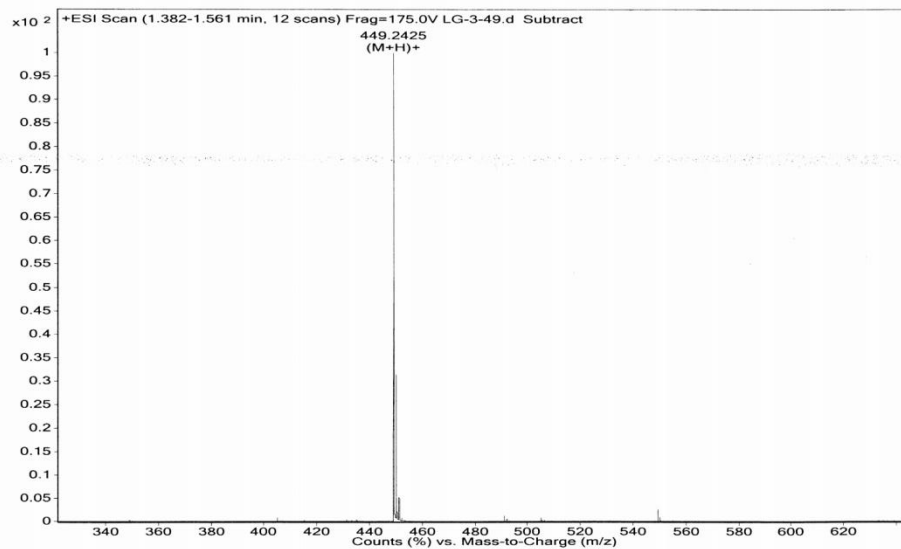

LG-2-55  
PROTON

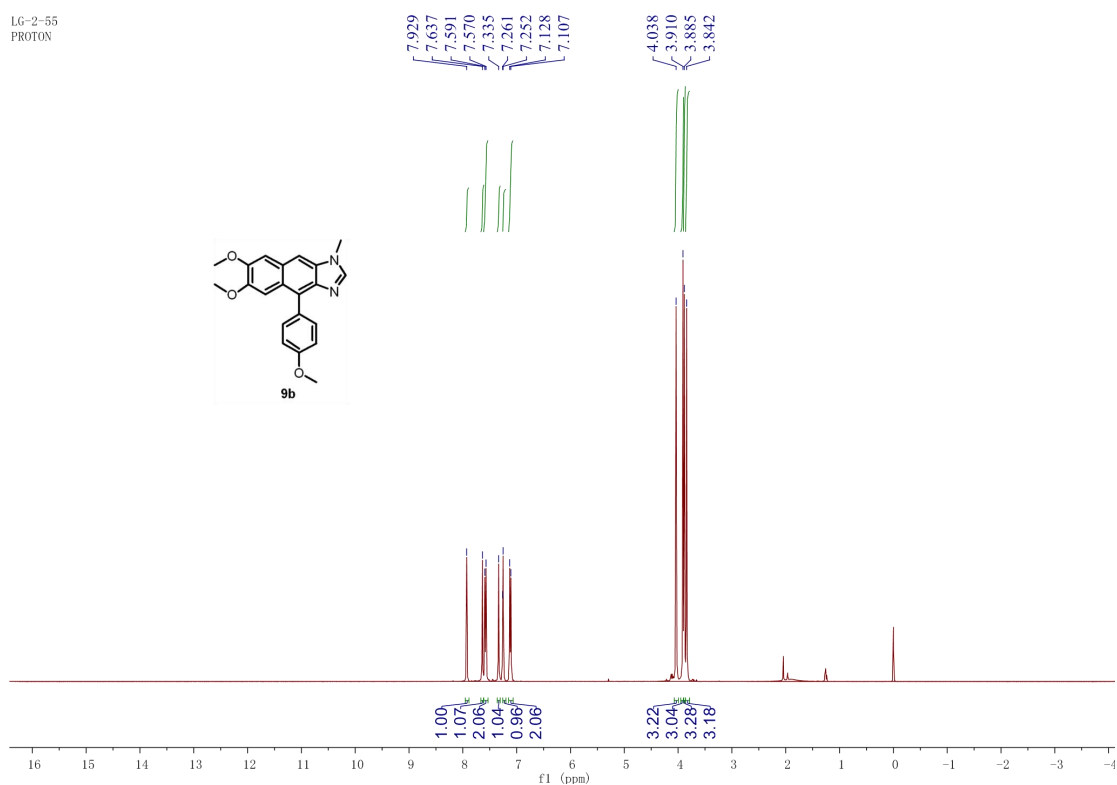

LG-2-55  
C13CPD

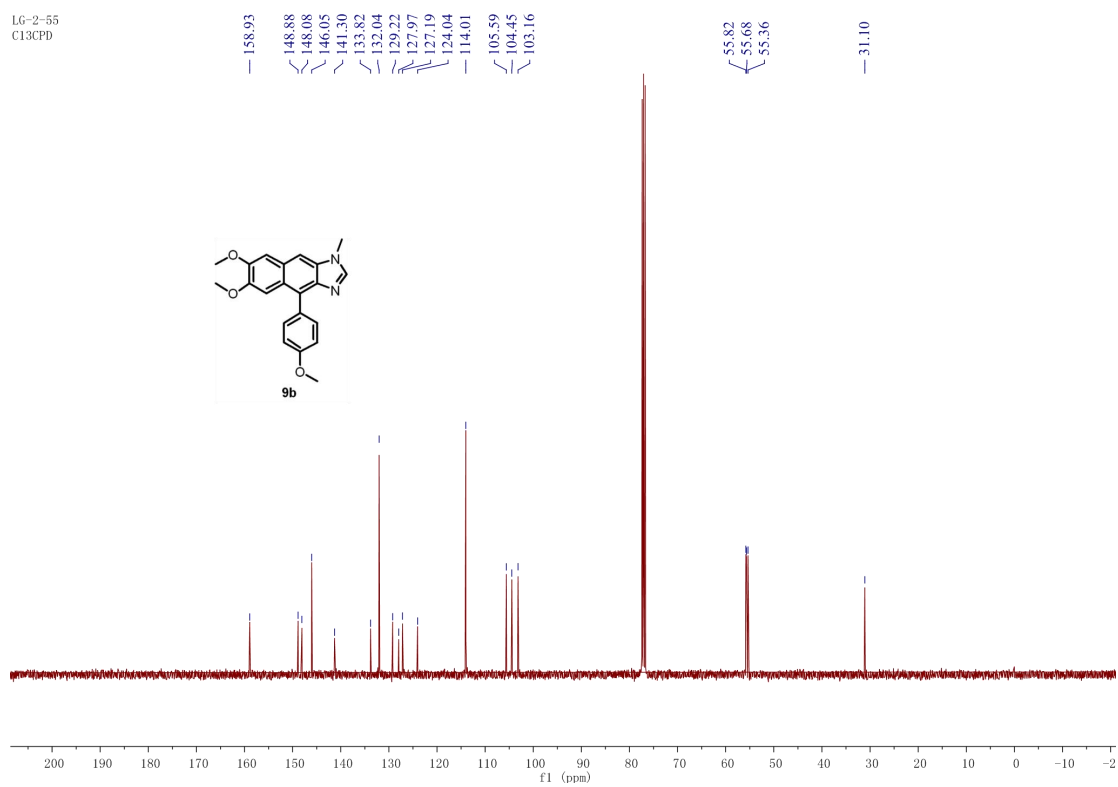

Crystal data and structure refinement for **2d**.

|                                   |                                                                                                                       |
|-----------------------------------|-----------------------------------------------------------------------------------------------------------------------|
| Identification code               | <b>2d</b>                                                                                                             |
| Empirical formula                 | C <sub>25</sub> H <sub>25</sub> N <sub>3</sub> O <sub>4</sub>                                                         |
| Formula weight                    | 431.48                                                                                                                |
| Temperature                       | 113(2) K                                                                                                              |
| Crystal system, space group       | Monoclinic, P2(1)/c                                                                                                   |
| Unit cell dimensions              | a = 10.901(2) Å    alpha = 90 deg.<br>b = 18.268(3) Å    beta = 100.519(5) deg.<br>c = 10.756(2) Å    gamma = 90 deg. |
| Volume                            | 2106.0(7) Å <sup>3</sup>                                                                                              |
| Z, Calculated density             | 4, 1.361 Mg/m <sup>3</sup>                                                                                            |
| Absorption coefficient            | 0.093 mm <sup>-1</sup>                                                                                                |
| F(000)                            | 912                                                                                                                   |
| Crystal size                      | 0.20×0.18 ×0.12 mm                                                                                                    |
| Theta range for data collection   | 3.15 to 27.54 deg.                                                                                                    |
| Limiting indices                  | -13≤h≤14, -23≤k≤23, -13≤l≤13                                                                                          |
| Reflections collected / unique    | 26655 / 4813 [R(int) = 0.0327]                                                                                        |
| Radiation                         | MoK $\alpha$ ( $\lambda$ = 0.71073)                                                                                   |
| Data / restraints / parameters    | 4813 / 1 / 296                                                                                                        |
| Goodness-of-fit on F <sup>2</sup> | 1.032                                                                                                                 |
| Final R indices [I>2sigma(I)]     | R1 = 0.0364, wR2 = 0.0890                                                                                             |
| R indices (all data)              | R1 = 0.0455, wR2 = 0.0951                                                                                             |
| Largest diff. peak and hole       | 0.289 and -0.265 e. Å <sup>-3</sup>                                                                                   |
| CCDC numbers                      | 1827519                                                                                                               |
